# Supplementary material for: Neoadjuvant Durvalumab Alone or Combined with Novel Immuno-Oncology Agents in Resectable Lung Cancer: The Phase II NeoCOAST Platform Trial
Source: PubMed Central journal article supplement — Cancer Discov. 2023 Sep 14;13(11):2394–411. doi: 10.1158/2159-8290.CD-23-0436 (PMC10618740; doi:10.1158/2159-8290.cd-23-0436), 2023-09-14
Supplement: cd-23-0436_supplementary_data_-_supplementary_table_7_suppsd1.pdf [file cd-23-0436_supplementary_data_-_supplementary_table_7_suppsd1.pdf]

**Supplementary Table 7. Tumor RNA Sequencing**

| <b>Durvalumab monotherapy arm</b> |                       |               |             |
|-----------------------------------|-----------------------|---------------|-------------|
| <b>gene</b>                       | <b>log2FoldChange</b> | <b>pvalue</b> | <b>padj</b> |
| SEMA3A                            | 1.695062585           | 3.12E-06      | 0.05177346  |
| MFSD2A                            | -1.625482454          | 4.61E-06      | 0.05177346  |
| CPM                               | -1.533789428          | 1.26E-05      | 0.07078467  |
| COL7A1                            | 1.600358439           | 9.83E-06      | 0.07078467  |
| SPATA31A7                         | -5.905841366          | 2.69E-05      | 0.09861845  |
| PLA2G4F                           | -1.791252627          | 4.39E-05      | 0.09861845  |
| HPGD                              | -1.524416071          | 4.22E-05      | 0.09861845  |
| DIO2                              | 1.361386452           | 3.27E-05      | 0.09861845  |
| OR2A4                             | -4.490420754          | 4.50E-05      | 0.09861845  |
| SLC26A9                           | -2.7856324            | 3.32E-05      | 0.09861845  |
| RNA5S9                            | -3.597278806          | 4.83E-05      | 0.09861845  |

| <b>Durvalumab + Oleclumab arm</b> |                       |               |             |
|-----------------------------------|-----------------------|---------------|-------------|
| <b>gene</b>                       | <b>log2FoldChange</b> | <b>pvalue</b> | <b>padj</b> |
| GPX2                              | -4.0774704            | 3.74E-18      | 6.39E-14    |
| PDK4                              | 3.76706965            | 1.62E-16      | 1.38E-12    |
| TSC22D3                           | 3.60070276            | 6.66E-16      | 3.79E-12    |
| FKBP5                             | 2.70268737            | 8.91E-14      | 3.80E-10    |
| DUSP1                             | 3.43890151            | 8.97E-13      | 3.06E-09    |
| HBA1                              | 4.23179515            | 1.94E-12      | 5.51E-09    |
| HBB                               | 4.46879135            | 2.95E-12      | 7.20E-09    |
| CEACAM5                           | -2.9888098            | 1.42E-10      | 3.03E-07    |
| KLRD1                             | 2.55404739            | 1.61E-10      | 3.05E-07    |
| CXCR4                             | 2.15046287            | 3.33E-10      | 5.68E-07    |
| CABYR                             | -2.6103425            | 5.04E-10      | 7.82E-07    |
| PER1                              | 2.48896302            | 1.12E-09      | 1.60E-06    |
| CD69                              | 2.99078992            | 1.65E-09      | 2.17E-06    |
| CHRD1                             | 2.06896528            | 2.17E-09      | 2.65E-06    |
| FAM107A                           | 3.05095261            | 3.10E-09      | 3.53E-06    |
| TXNIP                             | 1.65606804            | 3.65E-09      | 3.89E-06    |
| RGS2                              | 2.25395133            | 6.77E-09      | 6.80E-06    |
| ZBTB16                            | 4.84871171            | 9.15E-09      | 8.68E-06    |
| KRT80                             | -2.0396194            | 1.03E-08      | 9.23E-06    |
| DEPP1                             | 2.30137459            | 1.26E-08      | 1.08E-05    |
| AFAP1-AS1                         | -3.0486829            | 1.64E-08      | 1.33E-05    |
| RGS1                              | 4.64514465            | 2.45E-08      | 1.90E-05    |
| KLF9                              | 2.01732451            | 3.39E-08      | 2.52E-05    |
| SRGN                              | 1.69552509            | 3.55E-08      | 2.53E-05    |
| LAMB3                             | -1.7446958            | 3.70E-08      | 2.53E-05    |

|           |            |          |            |
|-----------|------------|----------|------------|
| CLEC4E    | 2.79583707 | 4.73E-08 | 3.10E-05   |
| BRDT      | -2.9547255 | 5.61E-08 | 3.55E-05   |
| LGSN      | -2.6962289 | 6.07E-08 | 3.70E-05   |
| PIK3IP1   | 1.50052048 | 6.85E-08 | 4.03E-05   |
| SCN7A     | 1.9831659  | 8.09E-08 | 4.61E-05   |
| SCARA5    | 3.37531927 | 8.91E-08 | 4.91E-05   |
| LINC02446 | 2.87077403 | 1.14E-07 | 6.10E-05   |
| SLA       | 1.93245147 | 1.44E-07 | 7.25E-05   |
| MMP19     | 2.03868645 | 1.42E-07 | 7.25E-05   |
| ETS1      | 1.39001622 | 1.79E-07 | 8.71E-05   |
| TCF21     | 1.64574461 | 1.96E-07 | 9.30E-05   |
| MAP3K9    | -1.6531635 | 2.26E-07 | 0.00010443 |
| CAVIN2    | 1.82670865 | 2.37E-07 | 0.00010649 |
| SLC6A4    | 3.90201207 | 2.52E-07 | 0.00010764 |
| OGFRL1    | 1.7532429  | 2.48E-07 | 0.00010764 |
| ZFP36     | 2.06556852 | 4.17E-07 | 0.00017355 |
| CCL4      | 2.10760413 | 4.77E-07 | 0.00019381 |
| BCL2      | 1.23996544 | 5.26E-07 | 0.00020891 |
| ERBB4     | 2.19191256 | 5.71E-07 | 0.0002166  |
| DDIT4     | 1.87117204 | 5.63E-07 | 0.0002166  |
| ADAMTS1   | 2.29752374 | 6.73E-07 | 0.00024965 |
| CYP24A1   | -2.2773589 | 7.83E-07 | 0.00028451 |
| AKR1C2    | -2.3587938 | 1.08E-06 | 0.00038457 |
| DSP       | -1.597455  | 1.14E-06 | 0.00039729 |
| CCN2      | 1.91092042 | 1.25E-06 | 0.00042808 |
| ZFP36L2   | 1.50976392 | 1.37E-06 | 0.00044909 |
| APOLD1    | 1.90067275 | 1.37E-06 | 0.00044909 |
| B4GALNT3  | -1.4123885 | 1.50E-06 | 0.00048177 |
| KCNE1     | 2.10032017 | 1.63E-06 | 0.00051616 |
| CCL5      | 1.26863503 | 1.70E-06 | 0.00052846 |
| ITIH5     | 1.74034252 | 1.83E-06 | 0.00053102 |
| ZFAND5    | 1.06591284 | 1.83E-06 | 0.00053102 |
| MET       | -1.2046001 | 1.83E-06 | 0.00053102 |
| IQANK1    | -1.9165979 | 1.83E-06 | 0.00053102 |
| JCHAIN    | 1.22104138 | 1.99E-06 | 0.00056697 |
| SOX4      | -1.4525482 | 2.37E-06 | 0.00065387 |
| RAB15     | -1.3750179 | 2.37E-06 | 0.00065387 |
| ACADL     | 3.09027829 | 2.51E-06 | 0.0006806  |
| NLRP3     | 1.95976125 | 2.57E-06 | 0.00068506 |
| ITK       | 1.565554   | 2.66E-06 | 0.00069812 |
| KLRK1     | 1.66778613 | 2.80E-06 | 0.00072506 |
| FOS       | 3.96467753 | 2.92E-06 | 0.00074522 |

|           |            |          |            |
|-----------|------------|----------|------------|
| PLAU      | -1.4621657 | 3.07E-06 | 0.00077043 |
| GRHL2     | -1.7008261 | 3.36E-06 | 0.00083127 |
| AKR1C3    | -1.6830476 | 3.60E-06 | 0.0008558  |
| CTLA4     | 1.69922382 | 3.59E-06 | 0.0008558  |
| KLF2      | 1.56524243 | 3.61E-06 | 0.0008558  |
| SMAP2     | 1.58881828 | 3.87E-06 | 0.00090493 |
| SLC29A4   | -2.1112949 | 4.31E-06 | 0.00099399 |
| EPCAM     | -1.7200131 | 4.62E-06 | 0.00105251 |
| TNXB      | 1.30883329 | 4.85E-06 | 0.00108867 |
| INMT      | 1.63952604 | 5.05E-06 | 0.00111964 |
| MARVELD2  | -1.7263656 | 5.14E-06 | 0.00112421 |
| AFF3      | 1.45036581 | 5.23E-06 | 0.00113104 |
| MMP13     | -2.4912315 | 5.33E-06 | 0.0011381  |
| RNF43     | -1.4015048 | 5.47E-06 | 0.00115335 |
| ADAMTS15  | 1.98948346 | 5.73E-06 | 0.00118007 |
| CCN1      | 2.11141868 | 5.74E-06 | 0.00118007 |
| OGN       | 2.59719876 | 5.94E-06 | 0.00120747 |
| ELN       | 1.76957079 | 6.01E-06 | 0.00120747 |
| LRRK2     | 1.84462947 | 6.20E-06 | 0.00123039 |
| JAML      | 1.23643467 | 7.37E-06 | 0.00144715 |
| TMC5      | -1.7796278 | 8.65E-06 | 0.00166207 |
| IQGAP2    | 1.04145026 | 8.66E-06 | 0.00166207 |
| MS4A7     | 1.29714618 | 8.91E-06 | 0.00169042 |
| BTNL9     | 1.61755315 | 9.34E-06 | 0.00175241 |
| CLDN18    | 2.32460067 | 9.61E-06 | 0.00178313 |
| NOS1AP    | -1.46117   | 9.79E-06 | 0.00179788 |
| SLED1     | 2.76673822 | 1.00E-05 | 0.00181815 |
| CD8A      | 1.35571146 | 1.01E-05 | 0.00181837 |
| CLEC3B    | 1.90527101 | 1.04E-05 | 0.00183104 |
| NUDT16    | 1.06504469 | 1.04E-05 | 0.00183104 |
| PDE3B     | 1.30892154 | 1.05E-05 | 0.00183736 |
| LINC01123 | -1.737911  | 1.07E-05 | 0.00184242 |
| MAP2      | -1.2341606 | 1.12E-05 | 0.00191355 |
| STAT4     | 1.30740984 | 1.16E-05 | 0.00196308 |
| MMP11     | -1.636639  | 1.18E-05 | 0.00197488 |
| PSTPIP2   | 1.48023371 | 1.26E-05 | 0.00207449 |
| ETV4      | -1.9698556 | 1.26E-05 | 0.00207449 |
| SCML4     | 1.41209788 | 1.29E-05 | 0.00209353 |
| SLC11A1   | 1.59027779 | 1.30E-05 | 0.00209353 |
| MGP       | 1.40093488 | 1.32E-05 | 0.00210532 |
| ADCYAP1   | 2.69083781 | 1.57E-05 | 0.0024771  |
| ABI3BP    | 1.47979184 | 1.62E-05 | 0.00253185 |

|           |            |          |            |
|-----------|------------|----------|------------|
| PRRG3     | 2.05256071 | 1.68E-05 | 0.00260738 |
| THBS1-IT1 | 2.07241758 | 1.71E-05 | 0.00261262 |
| LINC02471 | 4.10260836 | 1.71E-05 | 0.00261262 |
| IL1RL1    | 1.98154419 | 1.77E-05 | 0.00267436 |
| KLRC1     | 2.90768747 | 1.81E-05 | 0.0027156  |
| FAM83G    | -1.4905762 | 1.84E-05 | 0.00273684 |
| MEX3A     | -1.5824302 | 1.89E-05 | 0.00277703 |
| SFN       | -1.7756195 | 1.94E-05 | 0.00283834 |
| CELSR1    | -0.9847327 | 1.99E-05 | 0.00287945 |
| CLEC2D    | 0.95302514 | 2.03E-05 | 0.00291076 |
| LAMC2     | -1.2791322 | 2.16E-05 | 0.00307568 |
| SH3BP5    | 1.13300407 | 2.27E-05 | 0.00319777 |
| TLR2      | 1.18883147 | 2.53E-05 | 0.00354238 |
| ATF3      | 2.03128132 | 2.60E-05 | 0.00361348 |
| ADAMTS9   | 1.14033095 | 2.70E-05 | 0.00370282 |
| SLC44A5   | -1.8374911 | 2.71E-05 | 0.00370282 |
| EDNRB     | 1.28426378 | 3.06E-05 | 0.00414598 |
| SERPINE1  | 1.68138029 | 3.12E-05 | 0.00416699 |
| UGDH      | -1.3082198 | 3.11E-05 | 0.00416699 |
| IL18R1    | 1.35599752 | 3.16E-05 | 0.00418514 |
| LAPTM4B   | -1.447631  | 3.32E-05 | 0.00436481 |
| C6orf223  | -2.2357413 | 3.38E-05 | 0.00440647 |
| BIRC3     | 1.15793129 | 3.52E-05 | 0.00452849 |
| LTF       | 1.98325987 | 3.53E-05 | 0.00452849 |
| GZMK      | 1.55800041 | 3.57E-05 | 0.00455089 |
| GPX3      | 1.05728368 | 3.66E-05 | 0.00463002 |
| PTPRH     | -2.1010595 | 3.70E-05 | 0.00464442 |
| C7        | 1.8906617  | 3.80E-05 | 0.00473838 |
| PTPRC     | 0.93952998 | 3.95E-05 | 0.00485268 |
| SLC12A7   | -1.0462768 | 3.95E-05 | 0.00485268 |
| TRIM17    | -1.6626892 | 4.04E-05 | 0.00493063 |
| FOSB      | 5.30113454 | 4.23E-05 | 0.00512329 |
| PRF1      | 1.46878332 | 4.32E-05 | 0.00517393 |
| RAB25     | -1.9013567 | 4.33E-05 | 0.00517393 |
| GADD45B   | 2.02131542 | 4.40E-05 | 0.00518487 |
| ANGPTL1   | 2.39162614 | 4.40E-05 | 0.00518487 |
| SPTB      | -1.6343567 | 4.62E-05 | 0.00539808 |
| PIP4K2A   | 0.91930445 | 4.68E-05 | 0.00544151 |
| CD163     | 1.27556922 | 4.77E-05 | 0.00550364 |
| BCAR1     | -1.233044  | 5.01E-05 | 0.00566782 |
| PRKCH     | 1.10674364 | 4.96E-05 | 0.00566782 |
| EMP1      | 1.85567129 | 5.03E-05 | 0.00566782 |

|         |            |            |            |
|---------|------------|------------|------------|
| SPINT1  | -1.2815657 | 5.05E-05   | 0.00566782 |
| PRAME   | -2.2919788 | 5.50E-05   | 0.00606135 |
| ERICH6B | 3.43655532 | 5.49E-05   | 0.00606135 |
| DTX4    | -1.0650814 | 5.48E-05   | 0.00606135 |
| KCTD12  | 0.96234002 | 5.63E-05   | 0.00616613 |
| DSG2    | -1.4492183 | 5.74E-05   | 0.00623913 |
| SLC1A3  | 1.20122135 | 5.79E-05   | 0.0062611  |
| GPIHBP1 | 2.32476984 | 5.91E-05   | 0.00635068 |
| BNIP3   | -1.5413467 | 6.00E-05   | 0.00639901 |
| USP53   | 1.08069344 | 6.03E-05   | 0.00639901 |
| GPR21   | -4.6036376 | 6.15E-05   | 0.00648304 |
| ERAP2   | 1.04151592 | 6.28E-05   | 0.00654169 |
| PHLDA3  | -1.3898025 | 6.28E-05   | 0.00654169 |
| KLF4    | 2.2195551  | 6.65E-05   | 0.00685178 |
| FHL1    | 1.96585419 | 6.66E-05   | 0.00685178 |
| MMRN1   | 1.85503526 | 7.17E-05   | 0.00732623 |
| GFOD1   | 1.16497703 | 7.27E-05   | 0.00738891 |
| CD36    | 1.57309379 | 7.35E-05   | 0.00741275 |
| TOM1L1  | -1.226686  | 7.38E-05   | 0.00741275 |
| ESRP1   | -1.584139  | 7.84E-05   | 0.00782712 |
| SALL4   | -1.7885234 | 7.98E-05   | 0.00792364 |
| METTL7A | 1.21746486 | 8.30E-05   | 0.00819264 |
| XKR4    | 2.8538541  | 8.55E-05   | 0.00839144 |
| HAPLN1  | 2.89747893 | 8.82E-05   | 0.00860079 |
| PDE4B   | 1.19172186 | 9.05E-05   | 0.0087799  |
| ESRP2   | -1.4173858 | 9.44E-05   | 0.00905751 |
| TAMALIN | 1.43415668 | 9.41E-05   | 0.00905751 |
| MT2A    | 1.61288235 | 9.64E-05   | 0.00919572 |
| SMAD9   | 1.58891923 | 9.89E-05   | 0.00938019 |
| RGL3    | -1.1948256 | 0.00010271 | 0.00968925 |
| CDC6    | -1.6857878 | 0.00010908 | 0.01023349 |
| CSRNP1  | 1.74128272 | 0.00011093 | 0.01035025 |
| STOM    | 0.90783898 | 0.00011328 | 0.01051207 |
| CD226   | 1.23435626 | 0.00011505 | 0.01061805 |
| FOXO1   | 0.98308985 | 0.00011595 | 0.0106439  |
| GEM     | 1.38512733 | 0.00011664 | 0.01064957 |
| DUSP2   | 1.87800452 | 0.00011771 | 0.0106685  |
| SESN1   | 1.28857247 | 0.00011809 | 0.0106685  |
| GPR171  | 1.81530847 | 0.00012053 | 0.01083111 |
| SLC19A2 | 1.43916388 | 0.00012367 | 0.0110551  |
| FGL2    | 1.28077509 | 0.00012938 | 0.0114565  |
| FHL5    | 1.84807585 | 0.00013009 | 0.0114565  |

|          |            |            |            |
|----------|------------|------------|------------|
| CXCR6    | 1.58757427 | 0.00013017 | 0.0114565  |
| LONRF1   | 1.14567707 | 0.00013355 | 0.01169385 |
| ITM2B    | 0.87655059 | 0.00013633 | 0.01187618 |
| CEBPD    | 1.03455834 | 0.0001393  | 0.01207313 |
| CAPN12   | -1.5353935 | 0.00014051 | 0.01211318 |
| IPCEF1   | 1.11461744 | 0.00014118 | 0.01211318 |
| VEGFA    | -1.1544792 | 0.00014381 | 0.01218616 |
| HCLS1    | 0.97031956 | 0.00014417 | 0.01218616 |
| CNTNAP5  | 3.83988098 | 0.00014287 | 0.01218616 |
| SPRY1    | 1.15909868 | 0.00014571 | 0.01221619 |
| NECTIN4  | -1.6084478 | 0.00014596 | 0.01221619 |
| TMEM132A | -1.317254  | 0.00014833 | 0.01235376 |
| HSPB6    | 1.86728374 | 0.00015315 | 0.01265467 |
| CELF2    | 1.1875171  | 0.00015342 | 0.01265467 |
| TMEM63C  | -1.6835853 | 0.00015433 | 0.01266801 |
| KIAA1217 | -1.055154  | 0.00015672 | 0.01274201 |
| BTG1     | 1.17025814 | 0.00015604 | 0.01274201 |
| C5       | 1.30256442 | 0.00016007 | 0.01278176 |
| FGD6     | -1.3014465 | 0.00016077 | 0.01278176 |
| REEP6    | -1.8086838 | 0.00015922 | 0.01278176 |
| KLF15    | 1.69085667 | 0.00016095 | 0.01278176 |
| PLS1     | -1.4586358 | 0.00015824 | 0.01278176 |
| GRB7     | -1.4412806 | 0.0001618  | 0.01279    |
| CGN      | -1.0059907 | 0.00016669 | 0.01311583 |
| SLC6A3   | -2.4627688 | 0.00016917 | 0.01324931 |
| H4C15    | -1.8928142 | 0.00017104 | 0.01333474 |
| MTM1     | 1.12917706 | 0.00017259 | 0.01339419 |
| SLC16A14 | -1.6602042 | 0.00017795 | 0.01374794 |
| DCX      | 3.16986193 | 0.00018314 | 0.01408503 |
| PWAR5    | 1.1218244  | 0.00018448 | 0.01412501 |
| FYN      | 0.82568352 | 0.00018608 | 0.01418374 |
| IRX3     | -1.2320433 | 0.00018763 | 0.01421434 |
| PTGER4   | 1.16654887 | 0.00018815 | 0.01421434 |
| ZNF503   | -1.2278959 | 0.00018999 | 0.01425584 |
| XAGE1B   | -4.6660929 | 0.00019037 | 0.01425584 |
| AREG     | 1.59422824 | 0.00019174 | 0.01429575 |
| SIK1     | 0.95646013 | 0.000193   | 0.01432713 |
| FRZB     | 1.19404539 | 0.00019764 | 0.01460852 |
| GRIN2D   | -1.6674001 | 0.00019871 | 0.01462385 |
| ITM2A    | 1.59666059 | 0.00020388 | 0.01487644 |
| PGAP6    | -1.2312762 | 0.00020316 | 0.01487644 |
| POMT2    | -1.1276013 | 0.00020749 | 0.01507502 |

|            |            |            |            |
|------------|------------|------------|------------|
| KLF6       | 1.51780636 | 0.00021155 | 0.01528619 |
| CYTIP      | 1.13083078 | 0.00021218 | 0.01528619 |
| ERBB3      | -1.2396165 | 0.00021856 | 0.01567958 |
| RSPO3      | 1.25069967 | 0.00022007 | 0.01572156 |
| RCAN1      | 1.26106758 | 0.00022144 | 0.0157533  |
| SAMSN1     | 1.09930201 | 0.0002225  | 0.0157631  |
| KIAA1549   | -1.0710694 | 0.00023214 | 0.01637828 |
| CHL1       | -1.1174176 | 0.00023503 | 0.01651422 |
| KCNMA1     | 1.47897215 | 0.00024458 | 0.01711484 |
| CRIM1      | 1.19607885 | 0.00024622 | 0.01715872 |
| COL10A1    | -1.5417098 | 0.00025258 | 0.0173892  |
| VWF        | 1.11106354 | 0.00025212 | 0.0173892  |
| PTGS2      | 1.50899326 | 0.00025252 | 0.0173892  |
| SAPCD2     | -1.9560407 | 0.00025871 | 0.01773974 |
| JPT1       | -1.4318581 | 0.00026237 | 0.017919   |
| AVIL       | -1.3702024 | 0.00026479 | 0.0180119  |
| B2M        | 0.80712895 | 0.00026644 | 0.0180525  |
| MROH6      | -1.3741784 | 0.00027236 | 0.01838056 |
| UNC5B      | -1.0616017 | 0.00027394 | 0.01838282 |
| PTPRU      | -1.0192067 | 0.00027562 | 0.01838282 |
| ANGPT1     | 1.21653758 | 0.00027455 | 0.01838282 |
| GABPB1-IT1 | 0.9719565  | 0.00028414 | 0.01865926 |
| ZNF260     | -1.0181434 | 0.00028167 | 0.01865926 |
| FDCSP      | 2.69739104 | 0.00028348 | 0.01865926 |
| KIAA1522   | -1.3288873 | 0.00028247 | 0.01865926 |
| ARRDC2     | 1.01631566 | 0.00028868 | 0.01888492 |
| DNAH14     | -1.4684609 | 0.00029105 | 0.01896704 |
| TPO        | 3.90998494 | 0.00030085 | 0.01935879 |
| SBSPON     | 2.11901581 | 0.0003016  | 0.01935879 |
| LDB3       | 1.74143733 | 0.00030103 | 0.01935879 |
| LINC01106  | -1.4969507 | 0.00030008 | 0.01935879 |
| IL6ST      | 0.87262761 | 0.00030932 | 0.01978004 |
| NELL2      | 1.27148289 | 0.00031134 | 0.01983495 |
| HOXC9      | -2.1033321 | 0.00032152 | 0.02031353 |
| ALKAL2     | 2.74940937 | 0.00032099 | 0.02031353 |
| PIK3R5     | 1.10002859 | 0.00032242 | 0.02031353 |
| BAIAP2L1   | -1.0770313 | 0.00032387 | 0.02032987 |
| G6PD       | -1.2892909 | 0.00033072 | 0.02068364 |
| TAF11L10   | 10.8305469 | 0.0003389  | 0.02111839 |
| DTHD1      | 1.45447025 | 0.00034796 | 0.02160392 |
| CXCL2      | 1.55473284 | 0.00035363 | 0.02183414 |
| CRISPLD2   | 1.19857063 | 0.00035423 | 0.02183414 |

|          |            |            |            |
|----------|------------|------------|------------|
| TRAF4    | -1.1782145 | 0.0003566  | 0.02190109 |
| FABP4    | 4.36581056 | 0.0003603  | 0.02204941 |
| OR2M4    | 3.40589485 | 0.00036428 | 0.02221343 |
| GDF10    | 2.38989559 | 0.00037493 | 0.0227811  |
| CEACAM6  | -1.5407596 | 0.00038085 | 0.02305871 |
| H3C14    | -6.4398174 | 0.00038774 | 0.02339295 |
| ANKRD44  | 0.85559721 | 0.00039187 | 0.02355884 |
| GJB2     | -1.3586023 | 0.00039806 | 0.02384747 |
| LARGE2   | -1.9069092 | 0.0004085  | 0.02438715 |
| MCL1     | 0.86388371 | 0.00041039 | 0.02441487 |
| GLUL     | 0.90038751 | 0.00041551 | 0.02463345 |
| ITPRIP   | 1.20977647 | 0.00041823 | 0.02470911 |
| SLC2A3   | 1.42738682 | 0.00042161 | 0.02482236 |
| TACC1    | 1.05190268 | 0.00044129 | 0.02589194 |
| SBK1     | -1.3965861 | 0.00044319 | 0.02591468 |
| ZNF812P  | 2.53954276 | 0.00044716 | 0.02605713 |
| NQO1     | -1.5067906 | 0.00045084 | 0.02609343 |
| SFTPC    | 3.89997028 | 0.0004504  | 0.02609343 |
| CMC1     | 1.13317839 | 0.00045245 | 0.02609839 |
| CCDC85C  | -1.1031745 | 0.00045646 | 0.02624134 |
| ITGA3    | -0.9348765 | 0.00046291 | 0.02652282 |
| GDF7     | 1.63402224 | 0.00047001 | 0.02683916 |
| EBF1     | 1.25113377 | 0.00048331 | 0.02750704 |
| EPPK1    | -1.3689482 | 0.0004854  | 0.02753377 |
| N4BP2L1  | 0.95629874 | 0.00048733 | 0.02755164 |
| IGSF10   | 1.45631521 | 0.0005     | 0.02817517 |
| RASSF7   | -1.3803071 | 0.00050392 | 0.02830243 |
| ANLN     | -1.254534  | 0.00050883 | 0.02848421 |
| ROCK1    | 0.73464477 | 0.00052432 | 0.02869324 |
| SLCO4A1  | 1.84577303 | 0.00052126 | 0.02869324 |
| JAG2     | -1.5489136 | 0.00052387 | 0.02869324 |
| DNAAF1   | 2.16167612 | 0.00051926 | 0.02869324 |
| HLA-DPB1 | 0.86337264 | 0.00052397 | 0.02869324 |
| NACC1    | -1.0045425 | 0.00051868 | 0.02869324 |
| CDC20    | -1.6264147 | 0.00051492 | 0.02869324 |
| CD74     | 0.69899464 | 0.00053743 | 0.02922301 |
| CYBRD1   | 0.79562417 | 0.00053696 | 0.02922301 |
| CXCL9    | 0.81327409 | 0.00054467 | 0.02944091 |
| COLGALT2 | 2.11115018 | 0.00054488 | 0.02944091 |
| SMARCA2  | 0.84102367 | 0.00055353 | 0.02944822 |
| MX2      | -0.8921613 | 0.00055709 | 0.02944822 |
| AHNAK2   | -0.949268  | 0.00055189 | 0.02944822 |



|                 |            |            |            |
|-----------------|------------|------------|------------|
| SAMHD1          | 1.00752518 | 0.00055627 | 0.02944822 |
| TRHDE-AS1       | 2.42478073 | 0.00055545 | 0.02944822 |
| MUC20           | -1.3149777 | 0.00055036 | 0.02944822 |
| LAD1            | -1.8050034 | 0.00055427 | 0.02944822 |
| PIK3R1          | 0.98743109 | 0.00056103 | 0.02947402 |
| AGRN            | -0.9797033 | 0.00056024 | 0.02947402 |
| ENO3            | -1.6093415 | 0.0005655  | 0.0296178  |
| EGLN3           | -1.3968286 | 0.0005855  | 0.03047513 |
| CNTFR           | 3.33506411 | 0.00058437 | 0.03047513 |
| PDCD4           | 0.78881666 | 0.00058723 | 0.03047513 |
| CD302           | 0.82151566 | 0.00059722 | 0.03089971 |
| AQP1            | 1.06331646 | 0.00060111 | 0.03100693 |
| CLIC5           | 1.02708709 | 0.00060313 | 0.03101749 |
| CD3D            | 1.36674397 | 0.00061325 | 0.03144353 |
| PLXNB3          | -1.824316  | 0.00061845 | 0.03161521 |
| MMP15           | -1.7410595 | 0.00062513 | 0.03186122 |
| FAM180A         | 2.0193613  | 0.00063053 | 0.03204084 |
| EVPL            | -1.4059602 | 0.00063396 | 0.03211933 |
| JUP             | -0.965244  | 0.00064726 | 0.03269614 |
| AKNA            | 0.81437435 | 0.00065018 | 0.03274689 |
| GASK1A          | 1.62852594 | 0.00065622 | 0.03295388 |
| INAVA           | -1.3674654 | 0.00066742 | 0.03341796 |
| ZNF331          | 1.07833775 | 0.00066941 | 0.0334198  |
| PLCH1           | -1.1697457 | 0.00067343 | 0.03352215 |
| OSGIN1          | -1.7003037 | 0.00067955 | 0.03372861 |
| MAL2            | -1.2093307 | 0.00068841 | 0.03406951 |
| IRAK3           | 1.01597575 | 0.00069271 | 0.03418282 |
| SNORA49         | 1.47843081 | 0.00070795 | 0.03483459 |
| C18orf15        | 1.89088045 | 0.00072366 | 0.03550516 |
| GPR39           | -1.7496945 | 0.00072596 | 0.03551585 |
| RGCC            | 1.17266746 | 0.00073063 | 0.03556082 |
| MAP3K13         | -0.8774166 | 0.00073104 | 0.03556082 |
| FOXA1           | -1.4125045 | 0.00073863 | 0.03573543 |
| PRR36           | -1.7177192 | 0.00073882 | 0.03573543 |
| SPTBN2          | -0.8313745 | 0.00075316 | 0.03632637 |
| PKP1            | -1.6846535 | 0.00075823 | 0.03646762 |
| TNFSF12-TNFSF13 | 10.1617806 | 0.00077406 | 0.03712457 |
| SERINC2         | -1.1444594 | 0.00078695 | 0.03763711 |
| LLGL2           | -1.1639332 | 0.00079385 | 0.03786107 |
| IL7R            | 1.11848949 | 0.00080523 | 0.03829677 |
| MAGED4B         | -1.7073819 | 0.00080758 | 0.03830166 |
| FOXO3           | 0.77794789 | 0.00083739 | 0.03948978 |

|          |            |            |            |
|----------|------------|------------|------------|
| SNORD97  | 1.37258877 | 0.00084066 | 0.03948978 |
| HBA2     | 4.19050205 | 0.00084188 | 0.03948978 |
| ABCB6    | -1.096648  | 0.00084101 | 0.03948978 |
| LYVE1    | 1.42248354 | 0.00086548 | 0.04048543 |
| TRIM47   | -1.2469262 | 0.00087567 | 0.04085024 |
| CD3E     | 0.98117819 | 0.00090862 | 0.04227206 |
| PTK2B    | 0.84968014 | 0.00091548 | 0.04236024 |
| RCSD1    | 1.04097448 | 0.00091505 | 0.04236024 |
| SPARCL1  | 1.13328297 | 0.00093139 | 0.04298006 |
| DLGAP2   | 2.33007064 | 0.0009399  | 0.04325553 |
| DOCK10   | 0.74769352 | 0.0009456  | 0.0434011  |
| AKR1C1   | -1.501738  | 0.00095265 | 0.04360753 |
| NR4A1    | 2.68611553 | 0.00095527 | 0.04361047 |
| SCGB3A1  | 4.38237628 | 0.00095836 | 0.04363455 |
| TMEM184B | -0.8331736 | 0.00096555 | 0.04378936 |
| LDLRAD4  | 0.81389369 | 0.00097134 | 0.04378936 |
| ERBB2    | -1.0890956 | 0.00097201 | 0.04378936 |
| SLC4A7   | 0.83754518 | 0.00097182 | 0.04378936 |
| PHLDA2   | -2.4700975 | 0.00097536 | 0.04382425 |
| GAS1     | 1.44090897 | 0.00098369 | 0.04408252 |
| CCND3    | 1.08351665 | 0.00099444 | 0.04433198 |
| SGK1     | 1.10151772 | 0.00099361 | 0.04433198 |
| MARVELD3 | -1.3160076 | 0.00101224 | 0.04500762 |
| CAPN6    | 2.87939991 | 0.00103002 | 0.04549937 |
| COASY    | -0.9009832 | 0.00103396 | 0.04549937 |
| PPP2R2B  | 1.66306615 | 0.00102711 | 0.04549937 |
| CCDC150  | -1.6884938 | 0.00103272 | 0.04549937 |
| SH2D4A   | -1.0343468 | 0.00104713 | 0.0458816  |
| SLC8A1   | 1.15049737 | 0.00104802 | 0.0458816  |
| MKI67    | -1.2746744 | 0.00105531 | 0.04608293 |
| NFIL3    | 1.08649259 | 0.00106515 | 0.04627589 |
| PTEN     | 0.72129797 | 0.00106466 | 0.04627589 |
| RNF144B  | 1.14724956 | 0.00109009 | 0.04723898 |
| GABRA2   | 2.78249005 | 0.00109729 | 0.04741769 |
| C1QTNF7  | 1.4926658  | 0.00110254 | 0.04741769 |
| XCR1     | 1.68137965 | 0.00110152 | 0.04741769 |
| RNASE4   | 1.22915446 | 0.00110875 | 0.04756483 |
| RPPH1    | 0.79168075 | 0.00111266 | 0.04761306 |
| SIRT7    | -0.9172433 | 0.00111905 | 0.04776674 |
| S1PR1    | 0.97581412 | 0.00112475 | 0.04789014 |
| ITGA8    | 1.11418306 | 0.00113193 | 0.0480761  |
| FAM83H   | -1.2919419 | 0.00114204 | 0.04826529 |

|            |            |            |            |
|------------|------------|------------|------------|
| ACKR2      | 1.86895028 | 0.00113955 | 0.04826529 |
| KCNK3      | 1.71514321 | 0.00115565 | 0.04871988 |
| ENC1       | -1.2386076 | 0.00116135 | 0.04883968 |
| PREX2      | 0.8712644  | 0.00118299 | 0.04962728 |
| LAMA3      | -0.9322394 | 0.00118872 | 0.04974578 |
| CCDC141    | 0.84401118 | 0.00119274 | 0.04979162 |
| IRS2       | 0.97994289 | 0.00121031 | 0.05039573 |
| AKAP12     | 1.09590372 | 0.00121901 | 0.05039573 |
| NFKBIA     | 0.79191389 | 0.00121364 | 0.05039573 |
| HOXD1      | -2.7639606 | 0.00121833 | 0.05039573 |
| ZDHHC11    | -1.4448926 | 0.00122554 | 0.05054301 |
| LCP1       | 0.8896729  | 0.0012359  | 0.05084757 |
| NWD2       | 2.711993   | 0.00125337 | 0.05144247 |
| OCIAD2     | -1.2556796 | 0.00127333 | 0.05213641 |
| GPR183     | 1.24010879 | 0.00128094 | 0.05219854 |
| ID2        | 1.13479101 | 0.00128096 | 0.05219854 |
| SH2D1A     | 1.0071675  | 0.00131002 | 0.0528975  |
| RELN       | 1.08705208 | 0.00130389 | 0.0528975  |
| DPYD       | 0.81608246 | 0.00131051 | 0.0528975  |
| CACNB2     | 1.35705544 | 0.00130987 | 0.0528975  |
| NKX2-1-AS1 | -2.2691034 | 0.00131493 | 0.05295074 |
| AZGP1      | 1.77976773 | 0.00133487 | 0.05350146 |
| IQGAP3     | -1.7084908 | 0.00133274 | 0.05350146 |
| RUSC1      | -1.1083088 | 0.00134259 | 0.05355932 |
| NTNG1      | 1.97704531 | 0.00134208 | 0.05355932 |
| C15orf39   | -0.9537236 | 0.00135488 | 0.05392343 |
| ZWINT      | -1.3044877 | 0.00137013 | 0.05427453 |
| TRAT1      | 1.21065044 | 0.00137323 | 0.05427453 |
| CYP4B1     | 1.5174537  | 0.00137212 | 0.05427453 |
| RASGEF1B   | 0.91816944 | 0.00137838 | 0.0543522  |
| SLC9A9     | 1.04457588 | 0.00138593 | 0.0545237  |
| AJUBA      | -1.1591524 | 0.00139047 | 0.05457665 |
| CXADR      | -1.2122875 | 0.0014044  | 0.05480574 |
| BCL11B     | 0.85187385 | 0.00139983 | 0.05480574 |
| TMEM92     | -1.9442934 | 0.00140593 | 0.05480574 |
| SOX12      | -1.0022986 | 0.00141654 | 0.05501467 |
| BCL9       | -1.241522  | 0.00141774 | 0.05501467 |
| MAMDC2     | 1.59905717 | 0.00143672 | 0.0555393  |
| NEDD9      | 0.87394718 | 0.00143778 | 0.0555393  |
| ACSL1      | 1.13316888 | 0.00144899 | 0.0555393  |
| CAMSAP3    | -1.2016845 | 0.00144483 | 0.0555393  |
| AZIN2      | -1.1268442 | 0.00145077 | 0.0555393  |

|             |            |            |            |
|-------------|------------|------------|------------|
| H3C15       | 9.63067075 | 0.00144818 | 0.0555393  |
| ARID5B      | 0.71685026 | 0.00145458 | 0.05556038 |
| CD72        | 1.10254931 | 0.00145975 | 0.05563341 |
| ITPR1       | 0.83470108 | 0.00146611 | 0.05575143 |
| GPNMB       | 0.70553282 | 0.00147368 | 0.0559147  |
| CCNH        | 1.04867415 | 0.00148306 | 0.05614598 |
| SPDYA       | 1.48115911 | 0.00150298 | 0.0567742  |
| CHP2        | 3.56342088 | 0.00151269 | 0.05688916 |
| GPRC5C      | -0.9973607 | 0.00151105 | 0.05688916 |
| CANT1       | -0.8194929 | 0.00155054 | 0.05818439 |
| IRF4        | -1.1402956 | 0.00155539 | 0.05823853 |
| PRSS8       | -1.214419  | 0.00155901 | 0.0582461  |
| RNY1        | 1.72865584 | 0.00156543 | 0.05835833 |
| ADAMTS9-AS1 | 1.9283391  | 0.00158176 | 0.05871085 |
| THEMIS2     | 0.96435978 | 0.00158149 | 0.05871085 |
| FBXO40      | 2.36132613 | 0.00161451 | 0.05979646 |
| SH3BGRL     | 0.74245196 | 0.00161813 | 0.0598007  |
| DMBT1       | 3.27993857 | 0.00163105 | 0.0601479  |
| CST7        | 1.16629953 | 0.00164036 | 0.060361   |
| F11R        | -0.9470602 | 0.00165896 | 0.06091403 |
| THBS1       | 0.96911686 | 0.0016794  | 0.06140055 |
| TONSL       | -1.161306  | 0.00167651 | 0.06140055 |
| THBD        | 1.07799402 | 0.00168976 | 0.06164731 |
| ARHGEF16    | -1.2639468 | 0.00170021 | 0.06189633 |
| IFNGR1      | 0.76916523 | 0.00170917 | 0.06209017 |
| BCAM        | -0.8403947 | 0.00171299 | 0.06209683 |
| CXCL12      | 0.76009854 | 0.00172215 | 0.0622967  |
| CASC9       | -2.3025492 | 0.00176221 | 0.06361098 |
| RAP1A       | 0.75526005 | 0.00176744 | 0.06366501 |
| DLG5        | -0.8404718 | 0.00178696 | 0.06423265 |
| KIF12       | -2.9111689 | 0.00180319 | 0.06454432 |
| C11orf96    | 1.33617436 | 0.00180064 | 0.06454432 |
| ABCC3       | -1.4546835 | 0.00181153 | 0.0647071  |
| LGI3        | 2.9689801  | 0.00185375 | 0.06607722 |
| HAND2-AS1   | 2.36476851 | 0.00186716 | 0.06632162 |
| VWA2        | -1.3581764 | 0.00186838 | 0.06632162 |
| RAPGEF5     | 0.70797861 | 0.00187612 | 0.06645817 |
| FAM157A     | -1.3063723 | 0.00189786 | 0.06708932 |
| RHOB        | 1.03110988 | 0.00193194 | 0.06815261 |
| MFS1        | 0.8265634  | 0.001943   | 0.06840159 |
| KSR2        | -1.6411267 | 0.00200023 | 0.07027152 |
| CNOT6L      | 0.83705222 | 0.00200808 | 0.07040236 |

|           |            |            |            |
|-----------|------------|------------|------------|
| SASH1     | 1.12118416 | 0.00201641 | 0.07054959 |
| ARHGAP10  | 1.19621853 | 0.00202835 | 0.07069589 |
| MGAM2     | 3.24419167 | 0.00203356 | 0.07069589 |
| PRKCB     | 0.89885958 | 0.00203715 | 0.07069589 |
| MARCO     | 1.23403922 | 0.00203579 | 0.07069589 |
| TBX15     | -1.5878812 | 0.00208338 | 0.07215326 |
| CLIC6     | -0.9207794 | 0.00210558 | 0.07222907 |
| UCHL1     | -1.131538  | 0.00211379 | 0.07222907 |
| SEMA3A    | -0.9074259 | 0.00209384 | 0.07222907 |
| SNCA      | 2.12321976 | 0.00211509 | 0.07222907 |
| SOD2      | 0.76495336 | 0.00211732 | 0.07222907 |
| GGTA1     | 0.91208041 | 0.00212364 | 0.07222907 |
| GLRX3     | -1.0113086 | 0.00210557 | 0.07222907 |
| TIGIT     | 0.89938589 | 0.00210091 | 0.07222907 |
| SLC12A8   | -1.128721  | 0.0021213  | 0.07222907 |
| PGR       | 1.27095201 | 0.00213128 | 0.07234472 |
| ABCA8     | 1.27097526 | 0.00214131 | 0.07254114 |
| PCDH15    | 2.02017589 | 0.00216729 | 0.07313105 |
| ULK1      | -0.7767545 | 0.00216699 | 0.07313105 |
| FENDRR    | 1.3692138  | 0.00218697 | 0.07364942 |
| PTGFR     | 1.67282967 | 0.00219833 | 0.07388632 |
| MAPK4     | 2.24267663 | 0.00221065 | 0.07400894 |
| IRX5      | -1.3727722 | 0.00220893 | 0.07400894 |
| ANKRD65   | -1.1194569 | 0.00221682 | 0.07407036 |
| HLA-DOA   | 0.84236985 | 0.00225321 | 0.07513926 |
| GNLY      | 1.14426465 | 0.00227932 | 0.07586177 |
| GLP2R     | 2.90408137 | 0.00228745 | 0.07597563 |
| NWD1      | 2.39023882 | 0.00229164 | 0.07597563 |
| DNAJC18   | 1.02266172 | 0.00229787 | 0.07598578 |
| SIX5      | -1.0154288 | 0.00230085 | 0.07598578 |
| MYH14     | -0.8191762 | 0.00231051 | 0.0761575  |
| TIPARP    | 1.13178604 | 0.0023163  | 0.07620143 |
| HLA-E     | 0.63719694 | 0.00232412 | 0.07626482 |
| LAMA2     | 0.92264205 | 0.00232716 | 0.07626482 |
| PPP1R13B  | -1.0059917 | 0.00236217 | 0.07711589 |
| SORT1     | 0.7266356  | 0.00235812 | 0.07711589 |
| FXD1      | 2.06979681 | 0.0023688  | 0.07718482 |
| PTPN22    | 1.02308722 | 0.00239063 | 0.07762368 |
| NKG7      | 1.26363409 | 0.00239136 | 0.07762368 |
| AGAP12P   | -2.2796699 | 0.00240227 | 0.07782979 |
| SH3TC1    | 1.03306769 | 0.00241561 | 0.07811395 |
| LINC00702 | 1.65753605 | 0.00242605 | 0.07830312 |

|            |            |            |            |
|------------|------------|------------|------------|
| LINC01550  | 1.25395353 | 0.00243817 | 0.07854593 |
| LINC00472  | 1.35154625 | 0.0024872  | 0.07953056 |
| EPHA10     | -2.0919237 | 0.00247381 | 0.07953056 |
| SRD5A3     | -1.0585088 | 0.00248075 | 0.07953056 |
| ARHGAP30   | 0.64765991 | 0.00248737 | 0.07953056 |
| AGTR1      | 1.98329613 | 0.00249204 | 0.07953104 |
| VDR        | -0.9356982 | 0.00250111 | 0.07967169 |
| SERPINB9   | 0.74660863 | 0.00250677 | 0.07970328 |
| RPL21P123  | 1.49331497 | 0.00252565 | 0.08015427 |
| ABCA4      | -1.6321199 | 0.0025306  | 0.08016214 |
| HECA       | 0.76126286 | 0.00253682 | 0.08021047 |
| PTK7       | -0.8123686 | 0.00257549 | 0.0812826  |
| PI16       | 2.98319754 | 0.00259659 | 0.08164688 |
| PTPRB      | 0.94836099 | 0.00259224 | 0.08164688 |
| VIM        | 0.72389468 | 0.00262562 | 0.08240792 |
| RNA5-8SP6  | 1.69133824 | 0.002634   | 0.08251898 |
| VIPR1      | 1.37648364 | 0.00264356 | 0.08266706 |
| NAP1L3     | 1.3850356  | 0.00267045 | 0.08335523 |
| ZC3H6      | 0.8347229  | 0.00267775 | 0.08343052 |
| TOP2A      | -1.3215401 | 0.00269125 | 0.08369834 |
| PLEKHA2    | 0.80300767 | 0.00272353 | 0.08454838 |
| SRGAP3-AS2 | 2.79348196 | 0.00273629 | 0.08479026 |
| OVOL2      | -1.4891879 | 0.00274736 | 0.08481154 |
| EGR1       | 2.64673373 | 0.00275283 | 0.08481154 |
| MGAT4C     | 1.97295731 | 0.00274524 | 0.08481154 |
| CBX2       | -1.9741738 | 0.00275685 | 0.08481154 |
| UBE2O      | -0.9021445 | 0.00277189 | 0.08487631 |
| HLA-DPA1   | 0.73648921 | 0.00277042 | 0.08487631 |
| AGER       | 0.95393575 | 0.00277387 | 0.08487631 |
| BARX1      | -2.5390186 | 0.0027965  | 0.08541575 |
| NRAD1      | 2.31380093 | 0.0028513  | 0.08677905 |
| TFRC       | 0.7662352  | 0.002849   | 0.08677905 |
| PTPRF      | -0.9831605 | 0.00289037 | 0.08781185 |
| PLSCR4     | 0.88890997 | 0.00291779 | 0.08848739 |
| ARHGEF38   | -1.2553935 | 0.00292824 | 0.08848988 |
| OMD        | 1.58564561 | 0.00292814 | 0.08848988 |
| ABCC10     | -0.8685358 | 0.0029441  | 0.08849605 |
| DENND3     | 0.71849749 | 0.00294918 | 0.08849605 |
| SELE       | 1.88915622 | 0.00294901 | 0.08849605 |
| TMEM184A   | -1.1134504 | 0.00293589 | 0.08849605 |
| SEMA4C     | -0.8348814 | 0.00296695 | 0.08887304 |
| RNF212     | -1.875609  | 0.00298801 | 0.08934726 |

|                        |            |            |            |
|------------------------|------------|------------|------------|
| PDLIM3                 | 1.32399969 | 0.00300141 | 0.08943471 |
| CSKMT                  | 1.0776428  | 0.00300065 | 0.08943471 |
| RNF149                 | 0.79344273 | 0.00301548 | 0.08969733 |
| LSAMP                  | 0.71702711 | 0.00303252 | 0.08975492 |
| MAP3K21                | -1.1453264 | 0.00303238 | 0.08975492 |
| KRT18                  | -0.9577968 | 0.00303318 | 0.08975492 |
| KIF18B                 | -1.5098685 | 0.00304323 | 0.08989625 |
| HJURP                  | -1.6537548 | 0.00305176 | 0.08999266 |
| LMCD1                  | 0.93553974 | 0.00308847 | 0.09023491 |
| AOC1                   | -1.9705075 | 0.00309326 | 0.09023491 |
| HTRA3                  | -1.1512301 | 0.00308344 | 0.09023491 |
| SSH2                   | 0.80961618 | 0.00308306 | 0.09023491 |
| RASSF10                | -1.4983015 | 0.00307406 | 0.09023491 |
| ART4                   | 1.5227229  | 0.00309697 | 0.09023491 |
| JUN                    | 1.2796568  | 0.00309368 | 0.09023491 |
| WNT7B                  | -1.2817553 | 0.00310391 | 0.09028317 |
| SKAP1                  | 0.96895314 | 0.00315111 | 0.09134472 |
| TRBC2                  | 0.83006011 | 0.00315058 | 0.09134472 |
| MAFB                   | 0.67794877 | 0.00317468 | 0.09187198 |
| CPNE4                  | -2.006487  | 0.00318306 | 0.09195879 |
| CACNB3                 | -0.9549221 | 0.00321039 | 0.09259149 |
| IMPA2                  | -1.0265497 | 0.0032284  | 0.09295384 |
| SRXN1                  | -1.302589  | 0.00326078 | 0.09372819 |
| IGFBP2                 | -1.2012863 | 0.00328076 | 0.094144   |
| HHIP                   | 1.60182031 | 0.00329557 | 0.09424871 |
| KCNQ3                  | -1.2752452 | 0.00330097 | 0.09424871 |
| CADM3-AS1              | 1.74425341 | 0.00329346 | 0.09424871 |
| STAG3L5P-PVRIG2P-PILRB | -1.1010054 | 0.00331366 | 0.0944532  |
| JUNB                   | 1.19593786 | 0.00332407 | 0.09459205 |
| LRRFIP1P1              | -0.7842945 | 0.00333231 | 0.0946687  |
| RERG                   | 1.03821657 | 0.00336336 | 0.09529035 |
| LPTM5                  | 0.74451153 | 0.00336572 | 0.09529035 |
| CAV1                   | 1.03040432 | 0.00337094 | 0.09529035 |
| TNFAIP3                | 0.90121464 | 0.00337818 | 0.0953372  |
| FMN1                   | 0.82686611 | 0.00340464 | 0.09560987 |
| SDCBP                  | 0.74564263 | 0.00339765 | 0.09560987 |
| ITGA10                 | 1.48371052 | 0.00339963 | 0.09560987 |
| RNF125                 | 0.91958717 | 0.00344373 | 0.09584331 |
| ADH1B                  | 2.54326145 | 0.00344002 | 0.09584331 |
| XRCC2                  | -1.4444557 | 0.00344207 | 0.09584331 |
| CTSW                   | 1.37561168 | 0.00341877 | 0.09584331 |
| ECRG4                  | 2.19496792 | 0.00344663 | 0.09584331 |

|            |            |            |            |
|------------|------------|------------|------------|
| EPS8L2     | -0.8649876 | 0.00343883 | 0.09584331 |
| HLA-A      | 0.60854434 | 0.00345887 | 0.09602732 |
| DAPP1      | 0.88502344 | 0.0034695  | 0.09603061 |
| KCNC1      | 2.11111914 | 0.00347257 | 0.09603061 |
| HSPB8      | 1.27182656 | 0.00347586 | 0.09603061 |
| GALNT16    | 1.28732269 | 0.00352468 | 0.0966424  |
| CLN8       | 0.76247333 | 0.00353197 | 0.0966424  |
| GNB4       | 0.73465722 | 0.00353087 | 0.0966424  |
| FUT3       | -1.6188586 | 0.0035286  | 0.0966424  |
| PLA2G2A    | 1.76428643 | 0.00352306 | 0.0966424  |
| LIMS4      | 2.0847005  | 0.00352055 | 0.0966424  |
| UBASH3B    | 0.98119928 | 0.00354053 | 0.09672151 |
| CCDC137    | -1.0105553 | 0.00355542 | 0.0969732  |
| SPATA31E3P | -8.8445683 | 0.00357486 | 0.09724449 |
| ZNRD2-DT   | -1.371593  | 0.00357676 | 0.09724449 |
| LINC01429  | -1.7258272 | 0.00360073 | 0.09770273 |
| PCDH10     | 2.4072875  | 0.00361078 | 0.09770273 |
| CLDN5      | 0.99506558 | 0.00360768 | 0.09770273 |
| C1orf158   | 2.93617402 | 0.00361713 | 0.09771962 |
| PDZRN3     | 1.05208288 | 0.00363421 | 0.09782388 |
| HLA-DQA1   | 0.97690363 | 0.00363817 | 0.09782388 |
| SMIM35     | 1.98868999 | 0.00363603 | 0.09782388 |
| TNFSF8     | 1.16805719 | 0.00366625 | 0.09842381 |
| BRSK1      | -1.5563021 | 0.00367828 | 0.09859188 |
| MS4A2      | 1.02949724 | 0.00368543 | 0.09860543 |
| TXNRD1     | -0.8862679 | 0.00369034 | 0.09860543 |
| AURKA      | -1.3894131 | 0.00371096 | 0.09884691 |
| BIRC5      | -1.2242686 | 0.00370605 | 0.09884691 |
| N4BP3      | -1.1234189 | 0.00372654 | 0.09910726 |
| GLIPR2     | 0.88090745 | 0.00373626 | 0.09921135 |
| UBE2C      | -1.5788559 | 0.00375124 | 0.09934466 |
| CCT5       | -0.9083878 | 0.00376325 | 0.09934466 |
| DIPK1B     | -1.2316929 | 0.00376318 | 0.09934466 |
| COA7       | -0.9982759 | 0.00376455 | 0.09934466 |
| DOCK11     | 0.64884045 | 0.00379648 | 0.09972477 |
| CILP       | 1.04845187 | 0.00379209 | 0.09972477 |
| DNAH5      | -1.0970699 | 0.00378667 | 0.09972477 |
| PRDM9      | 2.64277437 | 0.00380885 | 0.0998959  |
| IL33       | 1.26462635 | 0.00381616 | 0.09993433 |



| Durvalumab + Monalizumab arm |                |          |          |
|------------------------------|----------------|----------|----------|
| gene                         | log2FoldChange | pvalue   | padj     |
| PDK4                         | 4.13508986     | 2.71E-21 | 6.00E-17 |
| RNA5SP202                    | 7.00192199     | 1.20E-17 | 1.33E-13 |
| TSC22D3                      | 3.64457875     | 4.57E-17 | 3.37E-13 |
| FKBP5                        | 2.78123399     | 6.85E-14 | 3.79E-10 |
| CPM                          | 3.33693179     | 2.88E-13 | 1.27E-09 |
| DUSP1                        | 3.07555496     | 5.05E-12 | 1.86E-08 |
| RGS1                         | 4.28912482     | 1.29E-11 | 4.08E-08 |
| RNA5-8SN3                    | 3.89326612     | 1.52E-11 | 4.12E-08 |
| GOLGA6L1                     | -6.2133572     | 1.67E-11 | 4.12E-08 |
| CXCR4                        | 4.33866585     | 2.15E-11 | 4.75E-08 |
| LINC01451                    | -3.5696556     | 5.40E-11 | 1.09E-07 |
| SRGN                         | 3.65111381     | 6.42E-11 | 1.18E-07 |
| RNU1-27P                     | -3.3603711     | 1.04E-10 | 1.78E-07 |
| FAM83F                       | -3.2794541     | 1.70E-10 | 2.68E-07 |
| NDNF                         | 2.99954263     | 2.20E-10 | 3.25E-07 |
| SCGB3A2                      | 4.35049968     | 2.37E-10 | 3.28E-07 |
| JCHAIN                       | 4.27508062     | 2.95E-10 | 3.78E-07 |
| C4BPA                        | 4.10560813     | 3.08E-10 | 3.78E-07 |
| APOC1                        | 4.3624075      | 4.99E-10 | 5.81E-07 |
| SOST                         | -4.2933752     | 7.18E-10 | 7.94E-07 |
| LINC02446                    | 4.86486836     | 8.79E-10 | 9.26E-07 |
| IL7R                         | 2.91776667     | 1.54E-09 | 1.55E-06 |
| BIRC3                        | 2.80840816     | 2.41E-09 | 2.32E-06 |
| HLA-DRA                      | 3.05204119     | 2.90E-09 | 2.61E-06 |
| CXCL13                       | 3.96297753     | 2.95E-09 | 2.61E-06 |
| AQP4                         | 3.17215186     | 3.23E-09 | 2.65E-06 |
| NAPSA                        | 3.25788886     | 3.12E-09 | 2.65E-06 |
| SFTPD                        | 4.35211229     | 3.45E-09 | 2.73E-06 |
| KLF9                         | 2.45229163     | 4.36E-09 | 3.33E-06 |
| SLA                          | 3.00618837     | 4.64E-09 | 3.43E-06 |
| LRP1B                        | -3.6461735     | 5.55E-09 | 3.78E-06 |
| CD163                        | 2.9309886      | 5.44E-09 | 3.78E-06 |
| CD8A                         | 3.12474665     | 5.64E-09 | 3.78E-06 |
| ALOX15B                      | 2.9713908      | 6.05E-09 | 3.94E-06 |
| SERPINA1                     | 2.6191246      | 7.28E-09 | 4.60E-06 |
| SPEG                         | -2.3284186     | 8.20E-09 | 5.04E-06 |
| SMAP2                        | 3.00498124     | 9.08E-09 | 5.43E-06 |
| SFTPC                        | 7.52865645     | 9.57E-09 | 5.57E-06 |
| CYP4F11                      | -2.9134969     | 2.38E-08 | 1.35E-05 |
| HLA-DPA1                     | 2.91118524     | 3.05E-08 | 1.69E-05 |

|           |            |          |            |
|-----------|------------|----------|------------|
| PGC       | 3.50681062 | 3.57E-08 | 1.93E-05   |
| FGG       | 4.27877548 | 3.75E-08 | 1.93E-05   |
| IRAK3     | 2.26202    | 3.73E-08 | 1.93E-05   |
| APOE      | 3.34567985 | 4.73E-08 | 2.38E-05   |
| UGT1A1    | -2.9627852 | 4.92E-08 | 2.42E-05   |
| CACNA1B   | -3.5949711 | 5.28E-08 | 2.49E-05   |
| RNU4-2    | 2.83691133 | 5.21E-08 | 2.49E-05   |
| TRBC2     | 3.68914966 | 5.78E-08 | 2.62E-05   |
| B2M       | 2.81029303 | 5.80E-08 | 2.62E-05   |
| LRRK2     | 2.31714612 | 7.09E-08 | 3.14E-05   |
| CALML3    | -3.8632505 | 8.80E-08 | 3.82E-05   |
| TFPI2     | 3.53718628 | 9.57E-08 | 4.00E-05   |
| GZMK      | 4.95530559 | 9.58E-08 | 4.00E-05   |
| DEPP1     | 2.52559085 | 1.14E-07 | 4.68E-05   |
| CD69      | 3.48670999 | 1.26E-07 | 5.05E-05   |
| PTPN22    | 3.10037481 | 1.40E-07 | 5.53E-05   |
| SNORD22   | 2.94231039 | 1.63E-07 | 6.35E-05   |
| IGKV1-39  | 3.73530324 | 1.83E-07 | 6.98E-05   |
| HAP1      | -2.4053229 | 1.96E-07 | 7.35E-05   |
| RGS2      | 2.65819432 | 2.08E-07 | 7.68E-05   |
| LCP1      | 2.63237053 | 2.31E-07 | 7.98E-05   |
| CNNM1     | -3.2742095 | 2.28E-07 | 7.98E-05   |
| GJB6      | -3.7538894 | 2.30E-07 | 7.98E-05   |
| CTSS      | 2.96086143 | 2.24E-07 | 7.98E-05   |
| LINC01694 | -3.0690633 | 2.44E-07 | 8.31E-05   |
| H4C12     | 5.42163733 | 2.51E-07 | 8.41E-05   |
| SAMSN1    | 2.80185119 | 2.79E-07 | 8.94E-05   |
| MRC1      | 2.80433593 | 2.78E-07 | 8.94E-05   |
| CLDN18    | 3.56849836 | 2.72E-07 | 8.94E-05   |
| IFNGR1    | 2.19238848 | 3.12E-07 | 9.87E-05   |
| KRT5      | -2.6111528 | 3.45E-07 | 0.00010754 |
| CD53      | 2.99636817 | 3.77E-07 | 0.00011438 |
| ZBTB16    | 2.75292641 | 3.76E-07 | 0.00011438 |
| IGLV3-25  | 3.14856973 | 4.02E-07 | 0.00012022 |
| SHISA9    | -2.853326  | 4.42E-07 | 0.00013032 |
| ANKRD62   | -3.537262  | 4.67E-07 | 0.00013602 |
| FBP1      | 2.75694547 | 5.17E-07 | 0.00014851 |
| ANP32C    | -5.5973855 | 5.40E-07 | 0.00015312 |
| SNORD97   | 2.48206882 | 5.99E-07 | 0.00016781 |
| VSIG4     | 2.82278642 | 6.30E-07 | 0.00017425 |
| SOX2-OT   | -2.3112322 | 6.69E-07 | 0.00018279 |
| RN7SL128P | 5.90191011 | 6.96E-07 | 0.00018514 |

|            |            |          |            |
|------------|------------|----------|------------|
| AIF1       | 2.93458691 | 7.03E-07 | 0.00018514 |
| DMRT2      | -2.9151974 | 6.91E-07 | 0.00018514 |
| SNHG8      | 2.27640672 | 7.38E-07 | 0.00019215 |
| TRAC       | 3.18282784 | 8.16E-07 | 0.00020359 |
| CCL18      | 3.22605841 | 8.19E-07 | 0.00020359 |
| IGHV3-7    | 3.00440215 | 8.10E-07 | 0.00020359 |
| UGT1A7     | -2.8077066 | 8.01E-07 | 0.00020359 |
| EMB        | 2.8622286  | 8.29E-07 | 0.00020392 |
| ITK        | 3.1323904  | 8.48E-07 | 0.00020616 |
| RGS6       | -2.8486721 | 8.66E-07 | 0.00020824 |
| SLC47A2    | -3.8434454 | 8.93E-07 | 0.00021242 |
| CCL5       | 3.01069862 | 9.16E-07 | 0.00021569 |
| PRR15L     | 2.93316129 | 9.46E-07 | 0.00021893 |
| LAPTM5     | 2.71565805 | 9.50E-07 | 0.00021893 |
| IGLV3-1    | 2.68347072 | 9.70E-07 | 0.00022121 |
| ALOX5AP    | 2.94346641 | 1.04E-06 | 0.00023557 |
| ARHGD1B    | 2.60447655 | 1.26E-06 | 0.00028105 |
| CCN2       | 2.47106461 | 1.34E-06 | 0.00029589 |
| CST7       | 3.82298002 | 1.37E-06 | 0.0002967  |
| RNU2-2P    | 2.42528183 | 1.36E-06 | 0.0002967  |
| LPL        | 2.86931698 | 1.43E-06 | 0.00030677 |
| PAPOLA-DT  | -4.3661879 | 1.44E-06 | 0.00030677 |
| MARCO      | 3.54624453 | 1.52E-06 | 0.00031936 |
| DLX6-AS1   | -2.6679832 | 1.77E-06 | 0.00037039 |
| HLA-DQA1   | 2.63506389 | 1.92E-06 | 0.00039271 |
| TRIM7      | -2.5546323 | 1.90E-06 | 0.00039271 |
| SNHG25     | 4.54611932 | 1.93E-06 | 0.00039272 |
| EIF4E3     | 2.0633784  | 2.01E-06 | 0.00039851 |
| SFTPA1     | 6.31359043 | 2.02E-06 | 0.00039851 |
| TRBC1      | 4.15286164 | 2.01E-06 | 0.00039851 |
| CXCL12     | 2.68957976 | 2.14E-06 | 0.00041986 |
| SERPINB1   | 2.13890459 | 2.21E-06 | 0.00042926 |
| MS4A4A     | 3.28792402 | 2.31E-06 | 0.00043767 |
| CD96       | 2.81062662 | 2.31E-06 | 0.00043767 |
| CR2        | 4.21042054 | 2.31E-06 | 0.00043767 |
| RHOU       | 2.11474886 | 2.36E-06 | 0.00043852 |
| FZD10      | -3.0381195 | 2.36E-06 | 0.00043852 |
| DDX60      | 2.23737447 | 2.42E-06 | 0.00044613 |
| SPATA31E3P | -6.3515245 | 2.44E-06 | 0.00044706 |
| GDA        | -3.0399847 | 2.51E-06 | 0.00045573 |
| SLC39A8    | 2.37038101 | 2.71E-06 | 0.00048756 |
| CYBB       | 2.62603675 | 2.96E-06 | 0.00052687 |

|           |            |          |            |
|-----------|------------|----------|------------|
| CYP4F3    | -2.589755  | 3.02E-06 | 0.00052687 |
| RNY1      | 3.86276613 | 3.00E-06 | 0.00052687 |
| GOLGA6L2  | -3.8271192 | 3.00E-06 | 0.00052687 |
| HDAC1P2   | -2.7848484 | 3.09E-06 | 0.00053413 |
| SLC6A14   | 2.08878439 | 3.14E-06 | 0.00053847 |
| CLEC2B    | 3.43096048 | 3.21E-06 | 0.0005464  |
| IDO1      | 2.65527232 | 3.27E-06 | 0.00055242 |
| HOPX      | 1.93017863 | 3.31E-06 | 0.00055415 |
| CD2       | 2.83925724 | 3.37E-06 | 0.00056031 |
| MIR205HG  | -2.1700846 | 3.39E-06 | 0.00056041 |
| TFPI      | 2.26742367 | 3.43E-06 | 0.00056145 |
| FAR2P1    | -3.7685038 | 3.67E-06 | 0.00059255 |
| ACSL5     | 2.28739517 | 3.66E-06 | 0.00059255 |
| CALN1     | -3.5089855 | 3.71E-06 | 0.00059446 |
| SALL3     | -5.2482184 | 3.78E-06 | 0.00060115 |
| CD74      | 2.46252756 | 3.83E-06 | 0.0006048  |
| LINC02076 | -3.5121182 | 3.90E-06 | 0.00061165 |
| NDUFA4L2  | -2.1808953 | 3.97E-06 | 0.00061859 |
| SSPOP     | -2.5079468 | 4.14E-06 | 0.00064118 |
| TCIM      | 2.15952102 | 4.19E-06 | 0.00064466 |
| CACNA2D2  | 2.29529205 | 4.31E-06 | 0.00065829 |
| COL17A1   | -2.9373611 | 4.54E-06 | 0.00068793 |
| HLA-DRB1  | 2.31759576 | 4.75E-06 | 0.0007131  |
| CLCA2     | -2.8700833 | 4.77E-06 | 0.0007131  |
| IGKV1-5   | 2.92953737 | 5.04E-06 | 0.00074672 |
| KIT       | 2.22921246 | 5.06E-06 | 0.00074672 |
| QRICH2    | -2.063505  | 5.14E-06 | 0.00074797 |
| SHOX2     | -2.2914127 | 5.14E-06 | 0.00074797 |
| RNASE1    | 2.16102879 | 5.23E-06 | 0.00075586 |
| SIM2      | -3.0939921 | 5.34E-06 | 0.00076507 |
| SMPDL3A   | 2.20375997 | 5.36E-06 | 0.00076507 |
| IFIT2     | 2.27734459 | 5.55E-06 | 0.00077381 |
| CELF2     | 2.3576     | 5.59E-06 | 0.00077381 |
| C16orf89  | 2.46428429 | 5.47E-06 | 0.00077381 |
| GOLGA6C   | -5.806155  | 5.59E-06 | 0.00077381 |
| DPP4      | 2.09483471 | 5.56E-06 | 0.00077381 |
| ZFP36L2   | 1.9585674  | 5.77E-06 | 0.00079357 |
| CYP2W1    | -5.442857  | 5.85E-06 | 0.00079414 |
| SNORD15A  | 3.17075914 | 5.84E-06 | 0.00079414 |
| PLIN2     | 2.32640235 | 5.90E-06 | 0.00079567 |
| TP63      | -2.3234724 | 5.93E-06 | 0.00079567 |
| GMFG      | 3.29441375 | 6.05E-06 | 0.00080597 |

|             |            |          |            |
|-------------|------------|----------|------------|
| DSG3        | -2.834926  | 6.20E-06 | 0.00081167 |
| IGHV3-21    | 3.6519277  | 6.19E-06 | 0.00081167 |
| STAR        | -3.0546262 | 6.18E-06 | 0.00081167 |
| LIPA        | 2.79113134 | 6.33E-06 | 0.00082394 |
| USH1G       | -4.0044277 | 6.41E-06 | 0.00083011 |
| SLC4A11     | -2.7173085 | 6.58E-06 | 0.00084113 |
| FAM169B     | -5.0662829 | 6.57E-06 | 0.00084113 |
| KLRD1       | 2.45479481 | 6.81E-06 | 0.00085089 |
| ETS1        | 2.43953296 | 6.77E-06 | 0.00085089 |
| CXCL2       | 2.5360865  | 6.76E-06 | 0.00085089 |
| CD52        | 3.31816647 | 6.80E-06 | 0.00085089 |
| LUM         | 2.86040471 | 6.94E-06 | 0.00086232 |
| TMSB4X      | 2.15806407 | 7.04E-06 | 0.00087006 |
| POTEF       | -4.2364197 | 7.23E-06 | 0.00088859 |
| STEAP4      | 1.99257267 | 7.32E-06 | 0.00089016 |
| NKG7        | 3.41513793 | 7.31E-06 | 0.00089016 |
| CYTIP       | 2.85524994 | 7.64E-06 | 0.00092368 |
| KRT6A       | -2.8426666 | 8.18E-06 | 0.00098331 |
| HLA-A       | 1.95304309 | 8.60E-06 | 0.00102836 |
| IGHV4-59    | 3.18897558 | 8.68E-06 | 0.00103236 |
| NNMT        | 1.89407345 | 8.80E-06 | 0.00103236 |
| KYNU        | 2.16908471 | 8.78E-06 | 0.00103236 |
| LINC01744   | -5.9082116 | 8.82E-06 | 0.00103236 |
| SDC4        | 1.82501714 | 9.19E-06 | 0.00107067 |
| IGHG2       | 2.66417199 | 9.33E-06 | 0.00107482 |
| LINC01833   | -4.9802548 | 9.32E-06 | 0.00107482 |
| TRAT1       | 3.18313133 | 9.90E-06 | 0.00113522 |
| PTPRC       | 2.55381508 | 9.98E-06 | 0.00113837 |
| EVI2A       | 2.93491274 | 1.08E-05 | 0.0012258  |
| ROS1        | 2.59456731 | 1.09E-05 | 0.00123159 |
| MTCL1       | -2.1863187 | 1.14E-05 | 0.00126345 |
| KLRC4-KLRK1 | 3.47785153 | 1.13E-05 | 0.00126345 |
| DOCK11      | 2.43181248 | 1.13E-05 | 0.00126345 |
| FAM71F1     | -3.4077246 | 1.14E-05 | 0.00126415 |
| MGAT4A      | 2.28448043 | 1.16E-05 | 0.00127942 |
| NOS1        | -2.3613906 | 1.18E-05 | 0.00129495 |
| SH3BGRL     | 2.36631037 | 1.21E-05 | 0.00131644 |
| IGHV3-11    | 3.73574588 | 1.23E-05 | 0.00132674 |
| SNORD15B    | 2.4775103  | 1.23E-05 | 0.00132674 |
| C17orf99    | -3.8295803 | 1.24E-05 | 0.00132717 |
| AP3B2       | -3.0407321 | 1.26E-05 | 0.00135032 |
| CYRIA       | 2.36330583 | 1.28E-05 | 0.00135911 |

|           |            |          |            |
|-----------|------------|----------|------------|
| MAFA      | -6.0500311 | 1.32E-05 | 0.00139254 |
| MGAT4C    | -2.694217  | 1.34E-05 | 0.00141009 |
| GPR171    | 2.96766418 | 1.35E-05 | 0.00141714 |
| IRX4      | -3.9968092 | 1.36E-05 | 0.00141742 |
| SFTPA2    | 6.07843899 | 1.38E-05 | 0.00143487 |
| MPP1      | 2.30039855 | 1.39E-05 | 0.00143546 |
| ARL6IP5   | 2.00097968 | 1.40E-05 | 0.00143632 |
| GZMA      | 2.96044232 | 1.44E-05 | 0.00146572 |
| PKP1      | -2.7347046 | 1.43E-05 | 0.00146572 |
| IGHM      | 2.65075178 | 1.49E-05 | 0.00150819 |
| IGHV3-15  | 3.2562187  | 1.50E-05 | 0.0015121  |
| SGMS2     | 1.90209183 | 1.52E-05 | 0.00152841 |
| IL6ST     | 2.16604024 | 1.53E-05 | 0.00153139 |
| MNDA      | 2.47025528 | 1.56E-05 | 0.00155327 |
| HSD17B11  | 1.8888291  | 1.58E-05 | 0.00157025 |
| SH2D1A    | 3.10041078 | 1.61E-05 | 0.00158014 |
| TBR1      | -3.9654994 | 1.61E-05 | 0.00158014 |
| HOXA11-AS | -4.5603376 | 1.62E-05 | 0.00158014 |
| IKZF1     | 2.3521503  | 1.61E-05 | 0.00158014 |
| PLEKHG4B  | -2.5661512 | 1.64E-05 | 0.00158778 |
| ST8SIA2   | -3.9822583 | 1.65E-05 | 0.00159026 |
| HLA-DPB1  | 2.35684512 | 1.66E-05 | 0.00159894 |
| ACSBG1    | -3.3259503 | 1.68E-05 | 0.00160042 |
| SLAMF6    | 2.78115088 | 1.69E-05 | 0.00160042 |
| IGSF9     | -2.5997865 | 1.68E-05 | 0.00160042 |
| CYB5A     | 2.08516527 | 1.70E-05 | 0.0016079  |
| KRT13     | -2.8042101 | 1.72E-05 | 0.00162169 |
| CMPK1     | 1.82937603 | 1.73E-05 | 0.00162169 |
| CCL4      | 2.47656835 | 1.83E-05 | 0.00170075 |
| SFTPB     | 5.29798865 | 1.83E-05 | 0.00170075 |
| PDE3B     | 1.98895038 | 1.84E-05 | 0.00170549 |
| SNORA18   | 2.97397349 | 1.85E-05 | 0.00170896 |
| CD84      | 2.4313133  | 1.86E-05 | 0.00171134 |
| PTGER4    | 2.43336643 | 1.88E-05 | 0.0017194  |
| FAM230D   | -5.7125565 | 1.94E-05 | 0.00175457 |
| ASAH1     | 1.81924449 | 1.94E-05 | 0.00175457 |
| ENPP2     | 2.52735931 | 1.93E-05 | 0.00175457 |
| TAGAP     | 2.40795421 | 2.03E-05 | 0.00182173 |
| RAB3B     | -2.4839622 | 2.12E-05 | 0.00190168 |
| GLUL      | 1.60008665 | 2.15E-05 | 0.00191802 |
| SLED1     | 3.04819472 | 2.20E-05 | 0.00195777 |
| SLC34A2   | 2.12110512 | 2.22E-05 | 0.00196721 |

|           |            |          |            |
|-----------|------------|----------|------------|
| DLX2      | -5.2636865 | 2.27E-05 | 0.00200323 |
| CHRD1     | 2.78699988 | 2.29E-05 | 0.00200708 |
| RNA5-8SN1 | -14.293601 | 2.30E-05 | 0.00201392 |
| MS4A1     | 3.0970622  | 2.35E-05 | 0.002044   |
| HLA-B     | 1.97403333 | 2.36E-05 | 0.0020446  |
| SLC11A1   | 1.95895184 | 2.39E-05 | 0.00206552 |
| SMIM3     | 2.46241377 | 2.48E-05 | 0.0021368  |
| LAMA1     | -1.8114041 | 2.50E-05 | 0.00214405 |
| BCL2A1    | 2.33680601 | 2.56E-05 | 0.00217047 |
| KPNA2P3   | -3.242921  | 2.57E-05 | 0.00217047 |
| CD3E      | 2.69667339 | 2.57E-05 | 0.00217047 |
| RNU4-1    | 2.46088566 | 2.55E-05 | 0.00217047 |
| FOXE1     | -3.1733805 | 2.60E-05 | 0.0021906  |
| RRAGD     | 1.83265359 | 2.63E-05 | 0.00220784 |
| JAML      | 2.36994784 | 2.67E-05 | 0.00221825 |
| CD3G      | 2.64918292 | 2.66E-05 | 0.00221825 |
| IGKV1-12  | 2.92047625 | 2.75E-05 | 0.00228326 |
| BMP7      | -2.2554908 | 2.77E-05 | 0.00228979 |
| SORT1     | 1.97548518 | 2.80E-05 | 0.00230007 |
| DUOX2     | -2.4378155 | 2.82E-05 | 0.0023122  |
| IGLL5     | 2.65545179 | 2.97E-05 | 0.0024235  |
| BTBD10P1  | -4.8343667 | 3.04E-05 | 0.0024706  |
| CD79A     | 3.0957574  | 3.07E-05 | 0.00248696 |
| TLR4      | 2.18558527 | 3.09E-05 | 0.00249849 |
| HLA-DMA   | 2.05881395 | 3.13E-05 | 0.00251728 |
| MSR1      | 2.33835429 | 3.15E-05 | 0.00252758 |
| IGKV1D-33 | 3.23333318 | 3.20E-05 | 0.00255643 |
| SGPP1     | 2.68881764 | 3.22E-05 | 0.00256446 |
| IGHV1-24  | 4.06829641 | 3.28E-05 | 0.00260075 |
| TLR2      | 1.7189645  | 3.33E-05 | 0.00263432 |
| C1orf162  | 2.70369511 | 3.41E-05 | 0.00268857 |
| GABRQ     | -3.940421  | 3.58E-05 | 0.00280126 |
| FLG-AS1   | -2.2716174 | 3.57E-05 | 0.00280126 |
| LGALS3    | 1.8469173  | 3.61E-05 | 0.00281608 |
| TYROBP    | 2.32589522 | 3.65E-05 | 0.00283404 |
| PREX1     | 2.15412543 | 3.85E-05 | 0.00297677 |
| INTS9-AS1 | -3.9952119 | 3.88E-05 | 0.00299017 |
| PCYT1B    | -2.1920044 | 3.90E-05 | 0.00299311 |
| ATP6V1B2  | 1.86488481 | 3.92E-05 | 0.00299956 |
| FNIP2     | 1.93104264 | 3.94E-05 | 0.00300305 |
| WHSC1L2P  | -3.2809281 | 3.98E-05 | 0.0030156  |
| TXNIP     | 1.98859741 | 3.98E-05 | 0.0030156  |

|           |            |          |            |
|-----------|------------|----------|------------|
| CLEC4E    | 2.93006614 | 4.00E-05 | 0.00302029 |
| CD68      | 2.16568719 | 4.11E-05 | 0.00307257 |
| FAM71A    | -4.6874187 | 4.10E-05 | 0.00307257 |
| IVL       | -4.824333  | 4.11E-05 | 0.00307257 |
| XKR7      | -4.1369928 | 4.17E-05 | 0.00307345 |
| PIK3AP1   | 1.97964166 | 4.16E-05 | 0.00307345 |
| LINC02915 | -4.8281239 | 4.13E-05 | 0.00307345 |
| NCF2      | 2.09956011 | 4.14E-05 | 0.00307345 |
| SDCBP     | 1.83632443 | 4.25E-05 | 0.00312663 |
| GADD45B   | 2.12411779 | 4.39E-05 | 0.00321722 |
| GOLGA6L7  | -3.4193831 | 4.42E-05 | 0.00322693 |
| IGLV2-8   | 2.74586381 | 4.45E-05 | 0.00323939 |
| ARHGEF6   | 2.36530303 | 4.47E-05 | 0.00324672 |
| SCML4     | 2.53165264 | 4.50E-05 | 0.00325342 |
| FOS       | 2.05396357 | 4.52E-05 | 0.00325616 |
| SOX21     | -2.5907461 | 4.56E-05 | 0.00326392 |
| IGKV2D-28 | 2.50768995 | 4.56E-05 | 0.00326392 |
| HHIP      | 2.09275415 | 4.60E-05 | 0.00327807 |
| ANKRD11P1 | -3.3023685 | 4.61E-05 | 0.00327807 |
| MT2A      | 2.11233189 | 4.64E-05 | 0.00328186 |
| ACP7      | -3.2538107 | 4.64E-05 | 0.00328186 |
| SLC7A14   | -3.3910599 | 4.73E-05 | 0.0033223  |
| FCER1G    | 2.23606105 | 4.73E-05 | 0.0033223  |
| FLRT3     | 2.05672703 | 4.79E-05 | 0.00335758 |
| VGF       | -4.4934994 | 4.81E-05 | 0.00335844 |
| NPC2      | 1.85095072 | 4.86E-05 | 0.00337913 |
| ACSL1     | 1.68952674 | 4.93E-05 | 0.00342132 |
| GPR183    | 2.64600582 | 4.98E-05 | 0.00344486 |
| CARD14    | -3.0246813 | 5.04E-05 | 0.00344928 |
| RASD1     | 2.13093482 | 5.03E-05 | 0.00344928 |
| IFI30     | 1.94308447 | 5.05E-05 | 0.00344928 |
| GRHL3     | -2.9400151 | 5.01E-05 | 0.00344928 |
| LINC01152 | -4.9502466 | 5.07E-05 | 0.0034514  |
| MAN1A1    | 2.10408002 | 5.15E-05 | 0.00349865 |
| PLBD1     | 2.32026226 | 5.27E-05 | 0.00356622 |
| FGR       | 2.09194926 | 5.31E-05 | 0.0035797  |
| ANXA5     | 1.72637936 | 5.34E-05 | 0.00359093 |
| GOLGA6L6  | -3.725669  | 5.40E-05 | 0.00361071 |
| MGP       | 3.14297408 | 5.39E-05 | 0.00361071 |
| PIK3R1    | 1.82464191 | 5.48E-05 | 0.0036527  |
| STAT4     | 2.22961141 | 5.52E-05 | 0.00367092 |
| RGPD2     | 2.10538732 | 5.59E-05 | 0.00370207 |



|            |            |          |            |
|------------|------------|----------|------------|
| TICRR      | -2.2821018 | 5.66E-05 | 0.00373853 |
| SOX6       | -1.8443131 | 5.72E-05 | 0.00377003 |
| CD302      | 2.4066442  | 5.91E-05 | 0.00387817 |
| ITGB2      | 2.02926946 | 5.97E-05 | 0.00390757 |
| NROB1      | -4.0402101 | 6.02E-05 | 0.00393284 |
| DRAM1      | 2.07269716 | 6.07E-05 | 0.00395384 |
| CCN1       | 2.28791497 | 6.10E-05 | 0.00396161 |
| PLA2G7     | 2.53284332 | 6.18E-05 | 0.00399986 |
| C3AR1      | 2.2795274  | 6.31E-05 | 0.00406987 |
| IGHV6-1    | 3.9755202  | 6.39E-05 | 0.00410063 |
| EVPLL      | -3.3781109 | 6.38E-05 | 0.00410063 |
| MS4A7      | 2.21849891 | 6.47E-05 | 0.00413784 |
| ACP5       | 2.21963182 | 6.52E-05 | 0.00416112 |
| TRIM22     | 1.85306091 | 6.69E-05 | 0.00425163 |
| TP53INP1   | 1.99607456 | 6.71E-05 | 0.00425163 |
| IL18RAP    | 2.46745711 | 6.75E-05 | 0.00426839 |
| CHRM3      | -1.9362057 | 6.78E-05 | 0.00427399 |
| SNORA74B   | 2.50793119 | 6.84E-05 | 0.00429805 |
| RNF165     | -2.0542574 | 6.86E-05 | 0.00429997 |
| UQCRB      | 1.59260567 | 6.92E-05 | 0.00430287 |
| LPXN       | 2.4258369  | 6.89E-05 | 0.00430287 |
| C1QA       | 2.09486611 | 6.91E-05 | 0.00430287 |
| C7         | 2.57035426 | 7.02E-05 | 0.00432809 |
| ADAMDEC1   | 3.15383845 | 7.02E-05 | 0.00432809 |
| LINC00861  | 2.6612963  | 7.02E-05 | 0.00432809 |
| SNORA12    | 4.24082542 | 7.17E-05 | 0.0044052  |
| HMGA2      | -2.4529593 | 7.22E-05 | 0.00442665 |
| LINC00668  | -2.9435692 | 7.26E-05 | 0.00443645 |
| TMEM242-DT | -4.8251085 | 7.32E-05 | 0.00446228 |
| H3C14      | -9.7345353 | 7.35E-05 | 0.00447047 |
| CRNN       | -3.4219136 | 7.42E-05 | 0.00449563 |
| KCNJ5      | 2.53394282 | 7.71E-05 | 0.00466202 |
| YEATS2-AS1 | -3.4132081 | 7.73E-05 | 0.00466202 |
| TMPRSS4    | -2.2317244 | 8.05E-05 | 0.00484066 |
| COL14A1    | 2.42477315 | 8.12E-05 | 0.00485573 |
| C1QB       | 2.11225121 | 8.10E-05 | 0.00485573 |
| NCKAP1L    | 2.19327443 | 8.23E-05 | 0.0049013  |
| DOCK8      | 2.04641912 | 8.24E-05 | 0.0049013  |
| ANKRD18A   | -2.2209954 | 8.26E-05 | 0.0049013  |
| LINC00029  | -5.2283802 | 8.53E-05 | 0.00504754 |
| IGHG4      | 2.49624003 | 8.61E-05 | 0.00508254 |
| LINC02393  | -4.6442323 | 8.64E-05 | 0.00508456 |

|           |            |            |            |
|-----------|------------|------------|------------|
| JAKMIP1   | 3.7412374  | 8.72E-05   | 0.00511817 |
| NEK2P1    | -5.6025511 | 8.81E-05   | 0.00515734 |
| KC6       | -2.51614   | 8.83E-05   | 0.00515774 |
| LINC00632 | 2.0908273  | 9.00E-05   | 0.00522808 |
| NDRG4     | -1.9165106 | 9.00E-05   | 0.00522808 |
| PSMB8     | 1.67001608 | 9.06E-05   | 0.00524818 |
| GLIPR1    | 2.07056459 | 9.09E-05   | 0.00525453 |
| SUSD2     | 2.20612824 | 9.50E-05   | 0.00547615 |
| C2orf83   | -4.5102824 | 9.65E-05   | 0.00554734 |
| MPP3      | -2.1756852 | 9.75E-05   | 0.00559234 |
| A2M       | 2.18044232 | 9.81E-05   | 0.00561093 |
| ADA2      | 2.04341809 | 9.97E-05   | 0.00562949 |
| IGLV2-14  | 2.56297462 | 9.96E-05   | 0.00562949 |
| TPPP2     | -4.9800615 | 0.00010023 | 0.00562949 |
| FBXO27    | -2.3361437 | 9.94E-05   | 0.00562949 |
| DPYD      | 1.9087153  | 9.94E-05   | 0.00562949 |
| NPM1P12   | -5.8549669 | 0.00010018 | 0.00562949 |
| CNTNAP5   | -4.6398696 | 9.93E-05   | 0.00562949 |
| MIR3648-1 | -9.5061571 | 0.00010078 | 0.00563175 |
| HNMT      | 2.40944836 | 0.00010064 | 0.00563175 |
| IGLC1     | 2.37329626 | 0.00010224 | 0.00568472 |
| PSG7      | -5.1873158 | 0.00010209 | 0.00568472 |
| FAM83C    | -2.9220209 | 0.00010352 | 0.00569228 |
| PARM1     | 1.57834048 | 0.00010294 | 0.00569228 |
| CRTAC1    | 3.81722408 | 0.00010378 | 0.00569228 |
| SNORA31B  | 2.88332797 | 0.00010459 | 0.00569228 |
| KIAA1549L | -2.4976166 | 0.00010469 | 0.00569228 |
| SOAT1     | 2.20916875 | 0.00010462 | 0.00569228 |
| EVI2B     | 2.50234973 | 0.0001033  | 0.00569228 |
| SIGLEC14  | 2.97645609 | 0.00010465 | 0.00569228 |
| SLC38A11  | -1.8944334 | 0.00010323 | 0.00569228 |
| NOLC1P1   | -4.7777825 | 0.00010667 | 0.00572255 |
| FGFBP1    | -2.6764048 | 0.0001068  | 0.00572255 |
| CD8B      | 2.80669719 | 0.00010732 | 0.00572255 |
| CTSB      | 1.6090643  | 0.00010665 | 0.00572255 |
| ZDHHC19   | -6.0434578 | 0.00010679 | 0.00572255 |
| ERFE      | -3.5516876 | 0.00010661 | 0.00572255 |
| SLC1A6    | -3.4494938 | 0.00010696 | 0.00572255 |
| IGFL4     | -3.5200564 | 0.00010717 | 0.00572255 |
| TRIM29    | -1.8578993 | 0.00010826 | 0.00575862 |
| RAPGEFL1  | -1.8862625 | 0.00010867 | 0.00576691 |
| GFI1      | 2.49413776 | 0.0001091  | 0.00577597 |

|            |            |            |            |
|------------|------------|------------|------------|
| CITED2     | 1.82664579 | 0.0001106  | 0.00580171 |
| SVOP       | -4.0266577 | 0.00011034 | 0.00580171 |
| CXCL10     | 2.23662572 | 0.00011043 | 0.00580171 |
| GLI2       | -1.8681899 | 0.00011064 | 0.00580171 |
| DLGAP1-AS2 | -1.8405996 | 0.00011172 | 0.00584442 |
| GOLGA8G    | -4.6298915 | 0.00011325 | 0.00591048 |
| ATP6V0D2   | 3.72172539 | 0.00011387 | 0.00592893 |
| OR5M1      | -4.6957828 | 0.0001146  | 0.00595282 |
| HERPUD1    | 2.17024627 | 0.00011636 | 0.00603037 |
| CNTN5      | -2.6387525 | 0.00011666 | 0.00603164 |
| PITX1      | -2.8005926 | 0.00011724 | 0.00603374 |
| RAP1A      | 1.77178467 | 0.00011718 | 0.00603374 |
| OSGIN2     | 1.773317   | 0.0001176  | 0.00603794 |
| RAB8B      | 1.76260579 | 0.00012032 | 0.00616336 |
| RNA5-8SP6  | 3.13168313 | 0.00012113 | 0.00616425 |
| CHAC1      | -2.9022127 | 0.00012117 | 0.00616425 |
| HEXB       | 1.85633432 | 0.00012098 | 0.00616425 |
| KIAA0087   | -3.89518   | 0.00012306 | 0.00624611 |
| MAT2B      | 1.86386528 | 0.00012387 | 0.00627242 |
| GJA8       | -6.0597028 | 0.00012415 | 0.00627242 |
| CCR4       | 2.40002885 | 0.00012564 | 0.00633341 |
| ITM2A      | 3.62385178 | 0.00012608 | 0.00634086 |
| TGFBR2     | 1.90641241 | 0.00012725 | 0.00638043 |
| FTL        | 1.9619669  | 0.00012744 | 0.00638043 |
| DCX        | -4.3166658 | 0.00012813 | 0.00640021 |
| LINC02003  | -5.6586758 | 0.00013071 | 0.00649996 |
| GPRC5A     | 1.65788168 | 0.00013063 | 0.00649996 |
| ABCA3      | 2.11240373 | 0.0001327  | 0.00657385 |
| SNORA73B   | 1.80038764 | 0.00013279 | 0.00657385 |
| TBC1D26    | -4.5498016 | 0.00013403 | 0.0066203  |
| UGT1A6     | -2.4571917 | 0.0001348  | 0.00664366 |
| FAM107B    | 1.67907744 | 0.0001379  | 0.00675249 |
| LRP2       | 2.4073237  | 0.00013779 | 0.00675249 |
| CD47       | 1.64468556 | 0.00013792 | 0.00675249 |
| PTGDS      | 2.34319037 | 0.00014154 | 0.00689895 |
| KLRC4      | 3.85942993 | 0.00014138 | 0.00689895 |
| ENPP4      | 2.3269303  | 0.00014284 | 0.00691646 |
| AQP9       | 2.19199011 | 0.0001427  | 0.00691646 |
| GBP5       | 2.1476799  | 0.00014264 | 0.00691646 |
| FCHO2      | 1.87612639 | 0.00014492 | 0.00700195 |
| CD48       | 2.53794832 | 0.0001477  | 0.00712099 |
| B3GALT5    | -2.1328165 | 0.00014915 | 0.00717252 |

|            |            |            |            |
|------------|------------|------------|------------|
| NIFKP4     | -5.7918333 | 0.0001498  | 0.00717252 |
| GPR34      | 2.3380092  | 0.00014957 | 0.00717252 |
| DQX1       | -3.7477934 | 0.00015007 | 0.00717252 |
| LINC02312  | -4.0171274 | 0.00015102 | 0.00718707 |
| TCHHL1     | -3.2055341 | 0.0001509  | 0.00718707 |
| HLTF       | 1.85512223 | 0.00015222 | 0.00722857 |
| COLGALT2   | -2.1329805 | 0.00015313 | 0.00725622 |
| TRIM16L    | -1.9615452 | 0.00015386 | 0.00727518 |
| PCED1B-AS1 | 2.53358747 | 0.00015456 | 0.00729261 |
| CTSE       | 2.42734431 | 0.00015515 | 0.00730513 |
| TRIQK      | 1.98108677 | 0.00015557 | 0.00730929 |
| DTD1-AS1   | -6.3129913 | 0.00015647 | 0.00732936 |
| BATF       | 3.08299532 | 0.00015677 | 0.00732936 |
| CTSL       | 1.68222142 | 0.00015732 | 0.00732936 |
| BSN        | -2.4787046 | 0.00015709 | 0.00732936 |
| SESN1      | 1.9894493  | 0.0001592  | 0.00740101 |
| ITGB6      | 1.65544346 | 0.00015959 | 0.00740357 |
| RBMX2P2    | -5.5930564 | 0.00015999 | 0.00740532 |
| FOLR1      | 2.35500281 | 0.00016029 | 0.00740532 |
| DLGAP1     | -2.0593549 | 0.0001607  | 0.00740858 |
| GRM5-AS1   | -3.3848577 | 0.00016148 | 0.0074292  |
| SIK1B      | 1.50023633 | 0.00016389 | 0.00752434 |
| OR5A1      | -3.790636  | 0.00016498 | 0.00755882 |
| KIZ-AS1    | -4.1230482 | 0.0001654  | 0.00756212 |
| DSC3       | -1.7753779 | 0.00016617 | 0.00758186 |
| ONECUT3    | -3.7425577 | 0.0001683  | 0.00766321 |
| DPYSL5     | -3.2470059 | 0.00016911 | 0.00768411 |
| MIR193BHG  | -2.1377263 | 0.00016952 | 0.00768729 |
| ASPG       | -3.4326478 | 0.00017227 | 0.00779569 |
| ERRFI1     | 1.71925111 | 0.00017287 | 0.00780696 |
| IGKV1-17   | 3.17149555 | 0.00017405 | 0.00784428 |
| TNK1       | -2.4344202 | 0.00017467 | 0.00785609 |
| KCNIP4-IT1 | -2.3587741 | 0.00018059 | 0.00810593 |
| SLAMF8     | 2.12972566 | 0.00018096 | 0.00810622 |
| THBS1-IT1  | 2.28416708 | 0.00018137 | 0.00810801 |
| FAM138F    | -3.1405603 | 0.00018269 | 0.00813427 |
| SNORD89    | 3.43363476 | 0.00018245 | 0.00813427 |
| PTMAP9     | -4.7714298 | 0.00018568 | 0.00825098 |
| RCOR2      | -2.8421199 | 0.00018795 | 0.00831483 |
| NBN        | 1.71431217 | 0.0001878  | 0.00831483 |
| RNU1-4     | -9.3491778 | 0.00018825 | 0.00831483 |
| CLIC2      | 1.92698225 | 0.00018952 | 0.00833761 |

|             |            |            |            |
|-------------|------------|------------|------------|
| XAGE1A      | 3.03215389 | 0.00018947 | 0.00833761 |
| RWDD1       | 1.87024462 | 0.00019093 | 0.00836639 |
| NRG1        | -1.792736  | 0.00019078 | 0.00836639 |
| SERINC1     | 1.59052197 | 0.0001915  | 0.00837505 |
| KLRK1       | 2.23816082 | 0.00019218 | 0.00837937 |
| IGKV3-11    | 2.72350311 | 0.00019236 | 0.00837937 |
| LINC01492   | -5.164466  | 0.00019529 | 0.00846273 |
| KLRG1       | 3.27428049 | 0.00019496 | 0.00846273 |
| SH2D6       | -3.2200183 | 0.00019542 | 0.00846273 |
| IGLV1-51    | 3.17297677 | 0.00019656 | 0.00847884 |
| CHI3L2      | 3.00657821 | 0.00019626 | 0.00847884 |
| TRIM72      | -3.0815139 | 0.00019736 | 0.00849077 |
| TEX15       | -3.2807325 | 0.0001976  | 0.00849077 |
| CXCR6       | 2.49467262 | 0.00019939 | 0.00855115 |
| C10orf71    | -2.9107623 | 0.00020043 | 0.0085789  |
| PTP4A2      | 1.49029939 | 0.00020192 | 0.00862596 |
| NT5E        | 1.74611558 | 0.00020335 | 0.00867045 |
| PARP8       | 1.8909794  | 0.0002043  | 0.00869403 |
| LINC01979   | -3.5011203 | 0.00020534 | 0.00872143 |
| FAM138D     | -4.2856746 | 0.00020768 | 0.00873714 |
| MFN1P1      | -5.2077302 | 0.00020756 | 0.00873714 |
| LRRC4       | -1.5874949 | 0.00020701 | 0.00873714 |
| GNB4        | 1.9060569  | 0.00020643 | 0.00873714 |
| MS4A6A      | 2.04079597 | 0.00020659 | 0.00873714 |
| IGLV1-40    | 2.77328047 | 0.00021081 | 0.00883539 |
| SLC40A1     | 2.13697581 | 0.00021045 | 0.00883539 |
| MFAP1P1     | -2.4655542 | 0.00021594 | 0.00903335 |
| GABRA5      | -3.0373476 | 0.00021824 | 0.00911213 |
| CTAGE15     | -3.0722666 | 0.00021994 | 0.00914847 |
| GOLGA6L22   | -2.6985566 | 0.00021954 | 0.00914847 |
| CCER1       | -3.7635676 | 0.0002243  | 0.00931226 |
| ITM2B       | 1.86272588 | 0.0002255  | 0.00934473 |
| CD37        | 2.27553985 | 0.00022677 | 0.00937992 |
| LGMN        | 1.6574333  | 0.00022837 | 0.00942833 |
| HRG         | -3.5956917 | 0.0002293  | 0.00944901 |
| SLC5A10     | -3.1167927 | 0.00023068 | 0.00948844 |
| BFSP1       | -2.4254367 | 0.00023117 | 0.00949066 |
| DCN         | 1.94552758 | 0.00023227 | 0.00951825 |
| CCDC80      | 1.77113892 | 0.00023284 | 0.00952419 |
| FAM170B-AS1 | -5.5582873 | 0.00023508 | 0.00957878 |
| NAT16       | -3.8810601 | 0.00023591 | 0.00957878 |
| FAR2P2      | -1.973063  | 0.00023548 | 0.00957878 |

|            |            |            |            |
|------------|------------|------------|------------|
| NPM1P42    | -4.71117   | 0.00023538 | 0.00957878 |
| NPIPA8     | -4.4136593 | 0.00023683 | 0.00958119 |
| CHIT1      | 2.50198531 | 0.00023668 | 0.00958119 |
| ZBED9      | -2.1513336 | 0.00023808 | 0.00959887 |
| NMI        | 1.85502461 | 0.00023814 | 0.00959887 |
| CDHR2      | -4.9085621 | 0.00023976 | 0.00964654 |
| RN7SL767P  | 3.65848112 | 0.00024046 | 0.00965707 |
| ZIC5       | -3.346313  | 0.00024166 | 0.00968805 |
| KRT14      | -2.7335028 | 0.00024237 | 0.00969884 |
| CRTAM      | 2.49576063 | 0.00024299 | 0.00970606 |
| SLC2A12    | -1.8069686 | 0.00024435 | 0.00974276 |
| SRGAP3-AS3 | -6.1082361 | 0.00024684 | 0.00980619 |
| CLEC18C    | -2.7471408 | 0.00024682 | 0.00980619 |
| MELTF      | -2.0478462 | 0.00024727 | 0.00980619 |
| IQGAP2     | 1.824151   | 0.00024911 | 0.00986163 |
| AP3S1      | 1.5893482  | 0.00025198 | 0.00995707 |
| SLC22A3    | 2.30870332 | 0.0002585  | 0.01019653 |
| SP9        | -4.5199312 | 0.00026009 | 0.0102229  |
| TMED5      | 1.71814949 | 0.00025994 | 0.0102229  |
| TMEM176B   | 1.80242061 | 0.00026076 | 0.01023117 |
| IGLV3-21   | 2.51386555 | 0.0002677  | 0.01044942 |
| IGLC2      | 2.15495661 | 0.00026774 | 0.01044942 |
| CPEB1-AS1  | -2.6408773 | 0.00026683 | 0.01044942 |
| IL2RG      | 2.46853866 | 0.00026941 | 0.01048335 |
| RNASE6     | 2.36004072 | 0.00026956 | 0.01048335 |
| WIF1       | 3.23390866 | 0.00027212 | 0.01056463 |
| KRT8P42    | -4.0075516 | 0.00027406 | 0.01058415 |
| FGFBP2     | -2.7855018 | 0.00027352 | 0.01058415 |
| FLG        | -2.8326712 | 0.00027402 | 0.01058415 |
| CAP1       | 1.62986401 | 0.00027565 | 0.01062703 |
| FRRS1L     | -2.2501971 | 0.00027639 | 0.01063674 |
| FAM83B     | -1.8896306 | 0.00027852 | 0.01070025 |
| C15orf39   | -1.6105729 | 0.00027956 | 0.01072155 |
| KLF6       | 1.50486143 | 0.00028058 | 0.0107422  |
| GRM4       | -3.1748099 | 0.00028323 | 0.01080632 |
| NPM1P3     | -4.7181651 | 0.00028294 | 0.01080632 |
| CLIP1-AS1  | -4.0042445 | 0.00028623 | 0.01090188 |
| SSTR5-AS1  | -4.3515994 | 0.00029006 | 0.01102878 |
| NGFR       | -1.9695659 | 0.00029192 | 0.01104893 |
| RGS20      | -3.290575  | 0.00029209 | 0.01104893 |
| SNORA53    | 2.23964882 | 0.00029117 | 0.01104893 |
| PI3        | 2.51859584 | 0.00029537 | 0.01110753 |

|           |            |            |            |
|-----------|------------|------------|------------|
| TREM1     | 1.83028522 | 0.00029524 | 0.01110753 |
| THRSP     | -5.0338245 | 0.00029596 | 0.01110753 |
| CDHR1     | -2.3651836 | 0.00029615 | 0.01110753 |
| CDC42     | 1.91740544 | 0.00029416 | 0.01110753 |
| PER1      | 1.61089197 | 0.00029724 | 0.01112966 |
| HOXD10    | -2.8453475 | 0.00030043 | 0.01122996 |
| EPSTI1    | 1.95408112 | 0.00030146 | 0.01123065 |
| SMIM10L2A | -2.2707916 | 0.0003014  | 0.01123065 |
| TIPARP    | 1.64115491 | 0.00030341 | 0.01128446 |
| SEZ6L     | -3.3007217 | 0.00030415 | 0.011293   |
| FN1       | 1.63070681 | 0.00030686 | 0.01137438 |
| VSIR      | 1.839579   | 0.00030868 | 0.01141059 |
| TLX2      | -4.1282824 | 0.00030887 | 0.01141059 |
| CHRNA7    | -2.1898546 | 0.00031043 | 0.01144927 |
| IGHV1-18  | 2.26839444 | 0.00031221 | 0.01147665 |
| MAP6D1    | -2.9163686 | 0.00031189 | 0.01147665 |
| GLS       | 1.53136391 | 0.00031488 | 0.01153635 |
| RASGEF1B  | 1.67815328 | 0.00031465 | 0.01153635 |
| C1QC      | 1.89901193 | 0.00031558 | 0.01154286 |
| ITGAX     | 1.80458654 | 0.00031651 | 0.01154454 |
| RAB27A    | 1.7100402  | 0.00031667 | 0.01154454 |
| ANKRD44   | 2.01618234 | 0.00031834 | 0.01158653 |
| TPRX1     | -5.736397  | 0.00031935 | 0.01160419 |
| RPS4Y1    | 1.9272502  | 0.00032303 | 0.01171869 |
| CLCN2     | -1.7007899 | 0.00032404 | 0.01173613 |
| TMX4      | 1.83381689 | 0.00032498 | 0.01175076 |
| TBXAS1    | 2.06138321 | 0.00033038 | 0.01192661 |
| WARS1     | 1.59127031 | 0.00033297 | 0.01200031 |
| VNN2      | 2.64009611 | 0.00033356 | 0.01200237 |
| LRRC3B    | -3.1350771 | 0.00033522 | 0.01200799 |
| GZMB      | 2.19077023 | 0.00033535 | 0.01200799 |
| HLA-C     | 1.51062309 | 0.00033433 | 0.01200799 |
| SOX2      | -1.7217702 | 0.0003362  | 0.01201901 |
| LIX1L     | 2.22988576 | 0.00033754 | 0.01204738 |
| OR8D1     | -4.9863343 | 0.00034095 | 0.01214948 |
| FAM83G    | -2.0794687 | 0.00034171 | 0.01215696 |
| TNFSF13B  | 2.16038458 | 0.0003452  | 0.0122418  |
| TLX1      | -5.04379   | 0.00034491 | 0.0122418  |
| TMEM117   | -1.7447507 | 0.000348   | 0.01231376 |
| SNX10     | 1.85209759 | 0.00034948 | 0.01231376 |
| OR5A2     | -4.1568939 | 0.00035057 | 0.01231376 |
| CFH       | 1.85750856 | 0.00034944 | 0.01231376 |

|           |            |            |            |
|-----------|------------|------------|------------|
| IL17RE    | -2.0384946 | 0.00035036 | 0.01231376 |
| XRCC6P3   | -4.1871509 | 0.00034882 | 0.01231376 |
| TXNDC2    | -2.7382216 | 0.00035314 | 0.01235038 |
| HLA-F     | 1.7745949  | 0.00035328 | 0.01235038 |
| LINC01206 | -2.213179  | 0.00035257 | 0.01235038 |
| TFEC      | 2.31044044 | 0.00035548 | 0.01237996 |
| BAHCC1    | -1.8174052 | 0.00035637 | 0.01237996 |
| GRIP1     | -2.3082533 | 0.00035545 | 0.01237996 |
| KLRC2     | 5.32473361 | 0.00035626 | 0.01237996 |
| COX7C     | 1.9292567  | 0.00035867 | 0.01242091 |
| HSPA1A    | 1.59903861 | 0.00035832 | 0.01242091 |
| DDX11L1   | -4.3908307 | 0.00035973 | 0.01243815 |
| B4GALNT3  | -2.030185  | 0.00036334 | 0.01245961 |
| IGLV1-44  | 2.17202931 | 0.00036211 | 0.01245961 |
| IGHA2     | 2.11010154 | 0.00036199 | 0.01245961 |
| FGL2      | 1.91065452 | 0.00036243 | 0.01245961 |
| RPSAP31   | -6.0292739 | 0.00036293 | 0.01245961 |
| SCN7A     | 1.88690568 | 0.00036373 | 0.01245961 |
| CLIP2     | -1.4705474 | 0.00036483 | 0.01247813 |
| ANXA8     | -1.6009612 | 0.00036541 | 0.01247879 |
| BDNF      | -2.6041076 | 0.00036798 | 0.01254692 |
| COL27A1   | -1.7177442 | 0.00037386 | 0.01265023 |
| ALPL      | 1.71153067 | 0.00037375 | 0.01265023 |
| FCGR3A    | 1.93136029 | 0.00037359 | 0.01265023 |
| MED12L    | -1.9227112 | 0.00037386 | 0.01265023 |
| DUSP5P1   | -3.7808487 | 0.00037221 | 0.01265023 |
| FOXI3     | -3.1843043 | 0.00037902 | 0.01280526 |
| RPL12P8   | -5.8287877 | 0.00038052 | 0.01283622 |
| RNVU1-7   | -1.3637989 | 0.00038328 | 0.01290948 |
| SNX18P27  | -5.4195134 | 0.00038725 | 0.01302359 |
| MFAP4     | 1.88133065 | 0.00039145 | 0.01314461 |
| CTBP2P9   | -5.3211473 | 0.0003949  | 0.01324054 |
| POSTN     | 1.73511816 | 0.00039976 | 0.01335563 |
| FLJ12825  | -4.334629  | 0.00039911 | 0.01335563 |
| NEB       | -1.6743596 | 0.00040014 | 0.01335563 |
| SPRY1     | 1.51040561 | 0.00040389 | 0.01346028 |
| IGKV3-15  | 2.46005961 | 0.00040587 | 0.01350587 |
| DCC       | -1.8471226 | 0.00040692 | 0.01352073 |
| MPEG1     | 2.0021988  | 0.0004095  | 0.01358599 |
| SNORA8    | 2.80322566 | 0.00041052 | 0.01359945 |
| STK4      | 1.58852943 | 0.00041168 | 0.0136176  |
| APOC2     | 2.8989301  | 0.00041356 | 0.01365915 |



|                |            |            |            |
|----------------|------------|------------|------------|
| RCCD1-AS1      | -4.0340433 | 0.00041927 | 0.0138273  |
| SERPING1       | 1.6006034  | 0.00042225 | 0.01390474 |
| PDCD1          | 2.58937672 | 0.00042544 | 0.01398883 |
| PLP1           | -3.3656888 | 0.00042735 | 0.01403087 |
| SPATA31A6      | -4.3004274 | 0.00042859 | 0.01405066 |
| DDIT4          | 1.44120252 | 0.00042964 | 0.01405898 |
| C3             | 1.59396321 | 0.00043065 | 0.01405898 |
| ITGB4          | -1.8748872 | 0.00043075 | 0.01405898 |
| AHRR           | -2.1448251 | 0.00043227 | 0.014088   |
| TREM2          | 3.22267591 | 0.0004332  | 0.0140976  |
| GDAP1L1        | -5.2111742 | 0.00043431 | 0.01411289 |
| HMCN1          | 2.12619778 | 0.0004352  | 0.01412099 |
| MMP11          | -2.0849743 | 0.0004385  | 0.01419811 |
| FRMD1          | -3.5520014 | 0.00043886 | 0.01419811 |
| SEZ6           | -5.2281331 | 0.00043999 | 0.01421382 |
| GPX3           | 1.87495976 | 0.00044183 | 0.0142527  |
| GPR21          | -3.8786221 | 0.00044353 | 0.01428642 |
| IGHG3          | 1.87413045 | 0.00044995 | 0.01447242 |
| CYP4F8         | -4.4281933 | 0.00045175 | 0.01449172 |
| WNT9A          | -2.2470281 | 0.00045186 | 0.01449172 |
| MPPED1         | -3.2640519 | 0.00045318 | 0.01451291 |
| ADH7           | -2.1665399 | 0.00045631 | 0.01457165 |
| RPTN           | -2.784772  | 0.00045633 | 0.01457165 |
| IGLC3          | 2.2081001  | 0.00045854 | 0.01462104 |
| LAP3           | 1.73918544 | 0.00046128 | 0.01468726 |
| MICC           | -4.6552797 | 0.00046658 | 0.01483476 |
| ARPC3          | 1.67372445 | 0.00046831 | 0.01486838 |
| PPFIA4         | -1.9918142 | 0.00046901 | 0.01486936 |
| ITGAM          | 1.95112367 | 0.00047075 | 0.01488191 |
| FGF23          | -3.8035867 | 0.0004702  | 0.01488191 |
| RNA5S9         | 3.79551773 | 0.00047287 | 0.01492755 |
| RPL17-C18orf32 | 3.88580675 | 0.00047636 | 0.01501634 |
| NRARP          | -1.5574883 | 0.00047996 | 0.01510483 |
| PSMB9          | 1.87632302 | 0.00048054 | 0.01510483 |
| AATBC          | -2.0709571 | 0.00048406 | 0.0151406  |
| LINC00705      | -5.2688936 | 0.0004839  | 0.0151406  |
| CLEC7A         | 2.14452366 | 0.00048441 | 0.0151406  |
| CASC19         | -2.5598097 | 0.000483   | 0.0151406  |
| PRF1           | 2.12139223 | 0.00048643 | 0.01518223 |
| FOXQ1          | -2.6424495 | 0.00048946 | 0.0152339  |
| CBX2           | -1.8746624 | 0.00048939 | 0.0152339  |
| HLA-DQB1       | 1.72863855 | 0.00049581 | 0.01540982 |

|            |            |            |            |
|------------|------------|------------|------------|
| XG         | -2.7366026 | 0.00050087 | 0.01553752 |
| BTK        | 2.31819457 | 0.00050152 | 0.01553752 |
| SPECC1-DT  | -4.0744002 | 0.00050203 | 0.01553752 |
| GVINP1     | 1.84777647 | 0.00050346 | 0.0155601  |
| COX6B2     | -3.6186498 | 0.00050744 | 0.01566134 |
| CTAGE14P   | -5.2550325 | 0.00050902 | 0.01568813 |
| NEFM       | -2.5547404 | 0.00051141 | 0.01571797 |
| B4GALNT4   | -2.4585696 | 0.00051127 | 0.01571797 |
| ANKRD19P   | -3.2613946 | 0.00051305 | 0.01572481 |
| EMILIN3    | -3.0796258 | 0.00051254 | 0.01572481 |
| KCNJ9      | -3.0831636 | 0.00051582 | 0.01578774 |
| LAMP3      | 1.95599142 | 0.00051656 | 0.01578871 |
| MIR210HG   | -2.1199737 | 0.00051983 | 0.01586653 |
| SALL4P6    | -5.2595151 | 0.00052058 | 0.01586754 |
| OTULINL    | 1.65827978 | 0.00052195 | 0.01588752 |
| AMY1C      | 3.81953722 | 0.00052311 | 0.01590088 |
| PTMAP4     | -4.536672  | 0.00052555 | 0.01595335 |
| IGHA1      | 2.06039352 | 0.00052799 | 0.01600337 |
| GASK1B     | 1.55788021 | 0.00052914 | 0.01600337 |
| IL20RB-AS1 | -4.8283202 | 0.00052937 | 0.01600337 |
| SLC19A2    | 1.5855905  | 0.0005302  | 0.01600641 |
| SURF6P1    | -5.6196489 | 0.00053364 | 0.01602289 |
| NEDD9      | 1.47191277 | 0.00053305 | 0.01602289 |
| LY6K       | -3.4454922 | 0.00053151 | 0.01602289 |
| SLC36A2    | -5.2230208 | 0.00053273 | 0.01602289 |
| IGHV4-39   | 2.70822599 | 0.00053532 | 0.01602394 |
| ITGBL1     | 1.92011933 | 0.00053543 | 0.01602394 |
| ALOX5      | 1.74926681 | 0.00053584 | 0.01602394 |
| CICP27     | -3.7922935 | 0.0005386  | 0.01608466 |
| COTL1      | 1.56667127 | 0.00053993 | 0.01609086 |
| HCLS1      | 1.84730999 | 0.00054026 | 0.01609086 |
| ITIH6      | -3.8920589 | 0.00054478 | 0.01619955 |
| RASSF2     | 1.87671101 | 0.00054538 | 0.01619955 |
| TMPRSS13   | -2.2258932 | 0.00054645 | 0.01620962 |
| LINC01856  | -4.1712636 | 0.00054941 | 0.0162683  |
| IGKC       | 2.03011509 | 0.0005499  | 0.0162683  |
| CCL3-AS1   | 4.14884175 | 0.00055272 | 0.01629244 |
| TENM4      | -1.6279453 | 0.00055269 | 0.01629244 |
| BNC1       | -2.6219178 | 0.00055292 | 0.01629244 |
| LINC01521  | -2.1749848 | 0.00055633 | 0.01634034 |
| MUC6       | -2.3206486 | 0.00055721 | 0.01634034 |
| NASPP1     | -2.8433648 | 0.00055726 | 0.01634034 |

|           |            |            |            |
|-----------|------------|------------|------------|
| DDAH1     | 1.44769165 | 0.0005575  | 0.01634034 |
| KRT17P4   | -4.8303569 | 0.00056434 | 0.01651876 |
| PARP15    | 2.16939452 | 0.00056661 | 0.01656355 |
| PRELID3A  | -2.1001714 | 0.00056935 | 0.01660756 |
| SRRM3     | -2.3560132 | 0.00056962 | 0.01660756 |
| DGKK      | -4.8261305 | 0.00057684 | 0.01677383 |
| TNNI3     | -3.607876  | 0.00057667 | 0.01677383 |
| PPIAP30   | -4.3064837 | 0.00057969 | 0.01679397 |
| THOC1-DT  | -2.3181021 | 0.00057927 | 0.01679397 |
| PTEN      | 1.48730168 | 0.00057981 | 0.01679397 |
| IL15      | 1.70424825 | 0.00058126 | 0.01681406 |
| PPP2R2C   | -2.0463499 | 0.0005836  | 0.01685965 |
| OR51L1    | -2.7517896 | 0.00058465 | 0.01686802 |
| STX7      | 1.74843058 | 0.00058952 | 0.01687972 |
| NKX1-2    | -3.8451075 | 0.00058784 | 0.01687972 |
| MYZAP     | 3.5494283  | 0.0005904  | 0.01687972 |
| LINC01964 | -3.3206208 | 0.00058829 | 0.01687972 |
| ANKRD30A  | -3.8358946 | 0.00059037 | 0.01687972 |
| OR5AN1    | -3.5679489 | 0.00058889 | 0.01687972 |
| KRT15     | -2.3173596 | 0.00058953 | 0.01687972 |
| TBC1D28   | -4.7547653 | 0.00059246 | 0.01691691 |
| NYAP1     | -2.3892079 | 0.00059937 | 0.01709216 |
| PRPF38AP1 | -3.518428  | 0.00060432 | 0.01721094 |
| OR10AH1P  | -5.2584739 | 0.00060938 | 0.01733291 |
| C2        | 1.68647757 | 0.00061062 | 0.01734589 |
| UGT1A2P   | -2.9431043 | 0.00061802 | 0.01753351 |
| FLJ36000  | -4.781939  | 0.00062304 | 0.01763064 |
| RGS10     | 1.77868082 | 0.00062228 | 0.01763064 |
| KRT18P8   | -4.4933307 | 0.00062469 | 0.01763217 |
| AJUBA-DT  | -2.7226444 | 0.00062776 | 0.01763217 |
| NPM1P11   | -4.2535065 | 0.00062652 | 0.01763217 |
| PELATON   | 2.15825013 | 0.00062691 | 0.01763217 |
| MTND5P28  | -5.4048521 | 0.00062787 | 0.01763217 |
| ACSM2A    | -2.9839731 | 0.00062548 | 0.01763217 |
| HLA-DMB   | 1.99523164 | 0.00062938 | 0.01765177 |
| LILRB4    | 1.97700446 | 0.00063016 | 0.01765177 |
| DNAH17    | -2.0871144 | 0.00063179 | 0.01765254 |
| SLC30A1   | 1.77085428 | 0.00063107 | 0.01765254 |
| AMH       | -2.1763739 | 0.00063375 | 0.01768496 |
| SKAP1     | 2.09735874 | 0.00063461 | 0.01768681 |
| SOD2      | 1.3188623  | 0.00063699 | 0.01773084 |
| LRRFIP1P1 | -1.5795466 | 0.00063982 | 0.01778708 |

|            |            |            |            |
|------------|------------|------------|------------|
| ERICH6B    | -3.4518249 | 0.00064762 | 0.01795879 |
| ADCY8      | -2.7239969 | 0.00064746 | 0.01795879 |
| IL1RL1     | 2.13498016 | 0.00065346 | 0.01809813 |
| FAM43A     | -1.8321422 | 0.00065831 | 0.01820965 |
| FLG2       | -3.1550678 | 0.00066003 | 0.01821173 |
| TCHH       | -2.3087884 | 0.00065985 | 0.01821173 |
| GALNT9     | -3.6890303 | 0.0006629  | 0.01826801 |
| GABRG3     | -2.9161735 | 0.00066629 | 0.01831597 |
| ZNF587P1   | -4.9383188 | 0.00066554 | 0.01831597 |
| PIK3IP1    | 1.47295262 | 0.00067147 | 0.01841267 |
| IGKV1-27   | 2.68350579 | 0.00067147 | 0.01841267 |
| RGCC       | 2.1463251  | 0.00067316 | 0.01841327 |
| HLA-E      | 1.51765186 | 0.00067294 | 0.01841327 |
| FGF7       | 1.89045074 | 0.00067399 | 0.01841327 |
| GAPDHP49   | -4.798396  | 0.00068878 | 0.01879409 |
| ERICH3-AS1 | -3.4177889 | 0.00069245 | 0.01887101 |
| RARRES1    | 2.37059592 | 0.00069769 | 0.01899029 |
| CDH8       | -2.7074245 | 0.00069904 | 0.01900366 |
| BANK1      | 1.88019801 | 0.00070799 | 0.0191529  |
| EFCAB6-DT  | -2.9864473 | 0.00070735 | 0.0191529  |
| CEBPE      | -4.0628029 | 0.00070789 | 0.0191529  |
| CCDC185    | -3.2678591 | 0.0007056  | 0.0191529  |
| IL12RB1    | 3.10756109 | 0.0007114  | 0.01922176 |
| IGSF6      | 1.87083671 | 0.00072179 | 0.01947867 |
| UBE2D1     | 1.62896385 | 0.00072532 | 0.01955015 |
| PKP3       | -2.185769  | 0.00072857 | 0.01961365 |
| SLC22A11   | -4.1048092 | 0.00073082 | 0.01965046 |
| SPATA31D3  | -3.6150403 | 0.00073363 | 0.01967828 |
| C1QL1      | -4.8354192 | 0.00073329 | 0.01967828 |
| MMP9       | 1.89454921 | 0.00074012 | 0.01978207 |
| MUC17      | -2.8245699 | 0.00074018 | 0.01978207 |
| HSD17B4    | 1.3660625  | 0.00073932 | 0.01978207 |
| MMP7       | 2.8638429  | 0.00074637 | 0.01990358 |
| GPRIN3     | 1.86142671 | 0.00074653 | 0.01990358 |
| AJUBA      | -1.6683016 | 0.00075808 | 0.02018714 |
| ST8SIA5    | -3.2202427 | 0.00076293 | 0.020292   |
| IFITM2     | 1.47968118 | 0.00076437 | 0.02030569 |
| NBEAP3     | -4.654082  | 0.00076999 | 0.0204306  |
| SOX10      | -3.7642364 | 0.0007733  | 0.02046934 |
| ATP6V1C1   | 1.58351321 | 0.00077277 | 0.02046934 |
| IGKV1-6    | 3.53622814 | 0.00077793 | 0.02056722 |
| JRK        | -1.4722653 | 0.0007794  | 0.02058163 |

|           |            |            |            |
|-----------|------------|------------|------------|
| CPA4      | -4.2744773 | 0.00078988 | 0.02078382 |
| COL3A1    | 1.61969927 | 0.00078832 | 0.02078382 |
| IGFL2-AS1 | -3.4175754 | 0.00078937 | 0.02078382 |
| NALF2     | -3.048991  | 0.00079747 | 0.02092312 |
| ZFHX2     | -1.5772785 | 0.00079894 | 0.02092312 |
| EVX1      | -4.4253686 | 0.00079639 | 0.02092312 |
| KNL1      | -1.6397689 | 0.00079895 | 0.02092312 |
| HNRNPCP4  | -3.9889042 | 0.00081091 | 0.02121103 |
| LAIR1     | 1.88091554 | 0.0008167  | 0.02133741 |
| SFTA2     | 2.69612258 | 0.00082231 | 0.02145873 |
| BARX1     | -2.9234378 | 0.00082394 | 0.02146377 |
| MFAP3L    | -2.1550525 | 0.00082445 | 0.02146377 |
| MBD3      | -1.4654131 | 0.0008324  | 0.02164534 |
| MOXD1     | 1.97363157 | 0.00083389 | 0.02165873 |
| TNFRSF1B  | 1.75770874 | 0.00084201 | 0.02184398 |
| TRGC2     | 2.88488873 | 0.00084562 | 0.02191177 |
| IGSF1     | -3.7078605 | 0.00084684 | 0.02191771 |
| PDSS2     | 1.93679873 | 0.0008522  | 0.02203077 |
| LINC01122 | -3.669329  | 0.00085543 | 0.02208856 |
| RBPJ      | 1.34694928 | 0.00085644 | 0.02208883 |
| WDR87     | -2.5297777 | 0.0008586  | 0.02211862 |
| TGM2      | 1.57024028 | 0.00086244 | 0.02214034 |
| STK24-AS1 | -2.9455345 | 0.00086049 | 0.02214034 |
| GPR176-DT | -2.8850468 | 0.00086157 | 0.02214034 |
| DAB2      | 1.7059368  | 0.00086421 | 0.0221601  |
| CAT       | 1.71767248 | 0.00086535 | 0.02216345 |
| MAGEA7P   | -5.0380022 | 0.00087266 | 0.02229912 |
| FYN       | 1.73819123 | 0.00087194 | 0.02229912 |
| PCK1      | -3.5841863 | 0.00087714 | 0.02238787 |
| LINC01121 | -3.0100201 | 0.00089132 | 0.02272357 |
| ICAM1     | 1.47939676 | 0.00089413 | 0.0227689  |
| LINC01460 | -2.7124807 | 0.00089745 | 0.02282716 |
| CTSW      | 2.19581368 | 0.00090191 | 0.02291428 |
| TMEM44    | -1.5037615 | 0.00090606 | 0.0229933  |
| CSF2RA    | 1.70288785 | 0.00090758 | 0.02300558 |
| LY96      | 2.93959528 | 0.0009105  | 0.02305322 |
| APBB1IP   | 2.02693662 | 0.00091596 | 0.02305956 |
| LINC01634 | -3.6492005 | 0.00091593 | 0.02305956 |
| A2M-AS1   | 1.99326618 | 0.00091274 | 0.02305956 |
| METAP2P1  | -3.3767592 | 0.00091554 | 0.02305956 |
| LINC02389 | -2.6584498 | 0.00091331 | 0.02305956 |
| KCTD12    | 1.7024438  | 0.00091871 | 0.02307204 |

|              |            |            |            |
|--------------|------------|------------|------------|
| NAALADL2-AS2 | -4.2850475 | 0.00091847 | 0.02307204 |
| FABP4        | 2.94628216 | 0.00091959 | 0.02307204 |
| SNORA49      | 2.62409958 | 0.00092145 | 0.02309271 |
| PANX2        | -1.8811713 | 0.00092415 | 0.02313409 |
| ABCA1        | 1.54636111 | 0.0009263  | 0.02316161 |
| KRT18P5      | -2.0019146 | 0.00092775 | 0.02317178 |
| FLJ16779     | -2.4334435 | 0.00093913 | 0.02330421 |
| HINT3        | 1.53447037 | 0.00093937 | 0.02330421 |
| AGGF1P4      | -4.5649421 | 0.00093603 | 0.02330421 |
| ZDHHC22      | -3.7831522 | 0.00093805 | 0.02330421 |
| ADGRF5       | 1.73456834 | 0.00093624 | 0.02330421 |
| OR4F5        | -5.7549754 | 0.00093676 | 0.02330421 |
| CNTNAP2      | -1.9117933 | 0.00094068 | 0.02331062 |
| LINC02875    | -2.8958853 | 0.00094366 | 0.02335834 |
| TRAM1        | 1.45728595 | 0.00094755 | 0.02342819 |
| SAMD9        | 1.63798637 | 0.00095663 | 0.02360012 |
| CD3D         | 2.45827331 | 0.00095645 | 0.02360012 |
| AIPL1        | -4.3270054 | 0.0009587  | 0.02362487 |
| SPDYE8       | -11.15128  | 0.00096019 | 0.02363515 |
| RAB27B       | 1.61887911 | 0.00096502 | 0.02365524 |
| PEBP4        | 3.58641169 | 0.00096581 | 0.02365524 |
| HOXC-AS2     | -3.4998786 | 0.00096742 | 0.02365524 |
| CTSH         | 1.51580809 | 0.00096468 | 0.02365524 |
| CPEB1        | -2.1643988 | 0.00096552 | 0.02365524 |
| SPDYE10P     | -3.2692082 | 0.0009664  | 0.02365524 |
| SAMHD1       | 1.65399834 | 0.00097028 | 0.02369893 |
| CSKMT        | 1.8061243  | 0.00097686 | 0.02383338 |
| KIRREL1-IT1  | -4.3371711 | 0.00097838 | 0.02384416 |
| SFRP4        | 1.61469381 | 0.00098286 | 0.02392713 |
| MAN2A1       | 1.62274011 | 0.00098515 | 0.02393007 |
| EPS15        | 1.60326752 | 0.00098451 | 0.02393007 |
| CNOT6L       | 1.49223389 | 0.00098955 | 0.0240108  |
| CRISPLD2     | 1.3030956  | 0.0009928  | 0.02406324 |
| SFRP2        | 1.87025649 | 0.00099704 | 0.0241396  |
| GIMAP7       | 2.05861405 | 0.00099875 | 0.02415059 |
| TRPV3        | -1.6954243 | 0.00099968 | 0.02415059 |
| ARHGEF4      | -1.9521293 | 0.00100262 | 0.02416886 |
| WWP1P1       | -3.5099289 | 0.0010018  | 0.02416886 |
| SMARCE1P3    | -3.6951276 | 0.00100628 | 0.02419623 |
| MIP          | -5.3333933 | 0.00100704 | 0.02419623 |
| OR14J1       | -4.0708233 | 0.00100529 | 0.02419623 |
| HOXA13       | -2.7433657 | 0.00100818 | 0.0241973  |

|             |            |            |            |
|-------------|------------|------------|------------|
| RPS29       | 1.70079238 | 0.00102317 | 0.02442576 |
| KNOP1P2     | -2.9659723 | 0.00101962 | 0.02442576 |
| SARAF       | 1.39998043 | 0.00102407 | 0.02442576 |
| FLJ40194    | -3.6421413 | 0.00102288 | 0.02442576 |
| IQGAP3      | -2.0163999 | 0.00102432 | 0.02442576 |
| FHAD1-AS1   | -3.4442601 | 0.00102075 | 0.02442576 |
| SERPINB5    | -1.6100097 | 0.0010283  | 0.0244847  |
| POU6F2      | -3.1474581 | 0.001029   | 0.0244847  |
| LUNAR1      | -3.5138487 | 0.00103156 | 0.0245191  |
| ILF2P1      | -3.7949073 | 0.00103425 | 0.02454764 |
| NLGN1       | -2.0278818 | 0.00103497 | 0.02454764 |
| IL1R1       | 1.2679519  | 0.00103696 | 0.02456842 |
| PITPNM2-AS1 | -3.8338573 | 0.00103969 | 0.02460664 |
| PAK6        | -1.8958004 | 0.00104231 | 0.02464248 |
| TAP1        | 1.40918257 | 0.00104432 | 0.024643   |
| OR7A17      | -4.2414925 | 0.00104456 | 0.024643   |
| RPL19P18    | -5.4004271 | 0.00104634 | 0.02465868 |
| HMGB3P30    | -4.8649889 | 0.00104945 | 0.02467947 |
| MLIP-AS1    | -4.679657  | 0.00104845 | 0.02467947 |
| LINC00511   | -1.7716806 | 0.00105069 | 0.02468226 |
| SLC6A19     | -3.7255668 | 0.00105405 | 0.02473504 |
| PITPNM3     | -1.7599558 | 0.00105764 | 0.02478316 |
| CXXC4-AS1   | -4.8152992 | 0.00105946 | 0.02478316 |
| MDGA1       | -1.4058287 | 0.00105937 | 0.02478316 |
| AKAP8P1     | -5.0241894 | 0.00106361 | 0.02483    |
| HPGD        | 1.91252983 | 0.00106371 | 0.02483    |
| RPS13P3     | -5.858148  | 0.00106678 | 0.02483113 |
| DGKB        | -2.6390124 | 0.00106825 | 0.02483113 |
| OR2F1       | -2.4640088 | 0.00106667 | 0.02483113 |
| IGF2BP2-AS1 | -3.0017615 | 0.00106727 | 0.02483113 |
| SELENOP     | 2.2620242  | 0.00106941 | 0.02483213 |
| STK17B      | 1.7731232  | 0.0010736  | 0.02490333 |
| TEDC2-AS1   | -2.7026101 | 0.00107914 | 0.02500558 |
| STARD3NL    | 1.54349075 | 0.00108205 | 0.02504673 |
| ABCB10P1    | -3.9735484 | 0.0010876  | 0.02507178 |
| LINC02620   | -4.8509499 | 0.00108446 | 0.02507178 |
| FAM222A-AS1 | -5.0304394 | 0.00108766 | 0.02507178 |
| PYHIN1      | 2.51001033 | 0.00108588 | 0.02507178 |
| HNRNPA3P10  | -3.9264785 | 0.00108885 | 0.02507311 |
| RESF1       | 1.45119834 | 0.0010928  | 0.02513778 |
| HENMT1      | 2.72420893 | 0.0010947  | 0.02515531 |
| TMEM132E-DT | -4.1345506 | 0.00110528 | 0.0253722  |

|           |            |            |            |
|-----------|------------|------------|------------|
| SIK1      | 2.18684933 | 0.00111283 | 0.02551158 |
| NUS1P4    | -4.0231173 | 0.00111366 | 0.02551158 |
| F2RL2     | -1.6249515 | 0.00111695 | 0.02553481 |
| ZDBF2     | -1.3121086 | 0.00111698 | 0.02553481 |
| GPNMB     | 1.81235467 | 0.00112008 | 0.02557912 |
| OR52I2    | -3.4570465 | 0.00112581 | 0.02568363 |
| SAT1      | 1.34988662 | 0.00112982 | 0.02569909 |
| NIPAL1    | -1.9512349 | 0.00112773 | 0.02569909 |
| ESPL1     | -1.8026433 | 0.00112997 | 0.02569909 |
| PSAP      | 1.50143768 | 0.00113187 | 0.02570695 |
| LITAF     | 1.3883761  | 0.00113264 | 0.02570695 |
| CD226     | 1.76401698 | 0.00113924 | 0.02574229 |
| APOL6     | 1.6478874  | 0.00113814 | 0.02574229 |
| CHURC1    | 1.44226654 | 0.00113607 | 0.02574229 |
| CD63      | 1.45579776 | 0.00114002 | 0.02574229 |
| TNFAIP3   | 1.48204163 | 0.00113968 | 0.02574229 |
| CCDC27    | -3.8585502 | 0.0011413  | 0.02574505 |
| PTPRT     | -1.6643503 | 0.00114391 | 0.02577753 |
| CFAP97D1  | -2.9137795 | 0.00114814 | 0.02584662 |
| MASP1     | -1.7260873 | 0.00114992 | 0.02586038 |
| TRIM67    | -3.1917937 | 0.00115343 | 0.025913   |
| SELL      | 1.88895511 | 0.00115767 | 0.02598178 |
| INMT      | 1.5971457  | 0.00116246 | 0.02603648 |
| MMP2-AS1  | 4.2806718  | 0.0011623  | 0.02603648 |
| PRKACB    | 1.49821182 | 0.00116542 | 0.02607647 |
| MIER1     | 1.38539011 | 0.00116792 | 0.02610598 |
| TMEM200C  | -1.9463493 | 0.0011692  | 0.02610822 |
| FKBP11    | 1.5823542  | 0.0011747  | 0.02620466 |
| RTKN2     | 1.8258671  | 0.00117734 | 0.02623708 |
| DENND6A   | 1.54499795 | 0.0011826  | 0.02627194 |
| RN7SL396P | 4.10694295 | 0.00118399 | 0.02627194 |
| VCAM1     | 1.57941642 | 0.00118484 | 0.02627194 |
| ERBIN     | 1.34397125 | 0.00118303 | 0.02627194 |
| SYT6      | -3.5887976 | 0.00118197 | 0.02627194 |
| CPVL      | 1.92114708 | 0.00118752 | 0.02630493 |
| LINC02012 | -2.7402677 | 0.00119686 | 0.02648524 |
| ARPC4     | 1.38710482 | 0.00120263 | 0.02658636 |
| GIMAP4    | 1.82535609 | 0.00120416 | 0.0265937  |
| FRMD7     | -4.6986933 | 0.00121059 | 0.02670905 |
| ZPR1P1    | -3.1095834 | 0.00121827 | 0.0268516  |
| ABCB1     | 2.15459934 | 0.00122641 | 0.02700416 |
| CABYR     | -1.8868645 | 0.00123164 | 0.02701193 |



|           |            |            |            |
|-----------|------------|------------|------------|
| HMGB1P17  | -3.9175114 | 0.00122938 | 0.02701193 |
| CPA3      | 2.37063313 | 0.00123056 | 0.02701193 |
| STAT1     | 1.55268214 | 0.00122823 | 0.02701193 |
| CCND3     | 1.36692934 | 0.00124541 | 0.02726852 |
| FDCSP     | 5.14367699 | 0.00124581 | 0.02726852 |
| PLEK      | 1.79596871 | 0.00125165 | 0.02735455 |
| NEURL3    | -3.8982464 | 0.00125221 | 0.02735455 |
| TMEM119   | 1.80046487 | 0.00125719 | 0.02743634 |
| CCR5      | 2.18503174 | 0.00125929 | 0.02745493 |
| CSF1R     | 1.61228498 | 0.00126127 | 0.02747114 |
| GVINP2    | -5.3615247 | 0.0012646  | 0.02751654 |
| RTKN      | -1.7759432 | 0.00126672 | 0.02753553 |
| PAK5      | -2.6088631 | 0.00127045 | 0.0275359  |
| IGF1R     | -1.735284  | 0.00127047 | 0.0275359  |
| SLC43A3   | 1.57504484 | 0.0012699  | 0.0275359  |
| SNX2      | 1.38597273 | 0.0012728  | 0.02755945 |
| MCM2      | -1.6029982 | 0.00127818 | 0.0276489  |
| COL7A1    | -1.5325575 | 0.0012824  | 0.0277131  |
| HCCAT5    | -5.1992372 | 0.00128863 | 0.0277663  |
| BAALC     | -1.8983094 | 0.00128647 | 0.0277663  |
| GOLGA8A   | -1.3823649 | 0.00128786 | 0.0277663  |
| PCLO      | -1.478631  | 0.00129135 | 0.02779799 |
| PKD2L1    | 4.64541038 | 0.00129309 | 0.0278084  |
| HMGB3P11  | -3.7579886 | 0.00129567 | 0.02783674 |
| RNA5-8SN4 | 8.90665538 | 0.00130198 | 0.0279182  |
| STAP1     | 3.50925652 | 0.00130119 | 0.0279182  |
| IGDCC3    | -3.2563724 | 0.00130769 | 0.02798626 |
| KRT18P41  | -5.0864635 | 0.00130743 | 0.02798626 |
| AHSG      | -3.7905412 | 0.00131138 | 0.02803809 |
| UBE2HP1   | -3.9819329 | 0.00131503 | 0.02808912 |
| KCNC1     | -2.620798  | 0.0013191  | 0.02814878 |
| LINC01544 | -3.2519197 | 0.00132312 | 0.02815619 |
| PKD1P3    | -1.5946284 | 0.00132177 | 0.02815619 |
| SP6       | -1.86827   | 0.00132326 | 0.02815619 |
| LINC00939 | -2.3610601 | 0.001332   | 0.02826481 |
| LINC01104 | -3.6852156 | 0.0013322  | 0.02826481 |
| TAF13     | 2.20075205 | 0.00132977 | 0.02826481 |
| CMAHP     | 1.77231692 | 0.00134097 | 0.02842379 |
| KIF1A     | -2.1161926 | 0.00134729 | 0.02853042 |
| GZMH      | 2.72840478 | 0.00135199 | 0.02860251 |
| SNHG1     | 1.311649   | 0.00135448 | 0.02862781 |
| KCNH7-AS1 | -5.2697487 | 0.0013592  | 0.02870003 |

|           |            |            |            |
|-----------|------------|------------|------------|
| RHOB      | 1.53233354 | 0.0013609  | 0.02870867 |
| CYBA      | 1.85928812 | 0.00136325 | 0.02873076 |
| CD40LG    | 2.77100138 | 0.00137068 | 0.02873999 |
| CD164     | 1.28302384 | 0.00136855 | 0.02873999 |
| MIA2-AS1  | -3.2115198 | 0.00136913 | 0.02873999 |
| ANKS4B    | -3.1390916 | 0.00137897 | 0.02873999 |
| ARHGAP15  | 1.8813838  | 0.00138    | 0.02873999 |
| GPSM3     | 1.97628813 | 0.00137134 | 0.02873999 |
| KIF4B     | -3.7391642 | 0.00138161 | 0.02873999 |
| KLF2      | 1.70314396 | 0.00137157 | 0.02873999 |
| PSMG3-AS1 | -1.7255509 | 0.0013755  | 0.02873999 |
| CLRN1     | -5.9201312 | 0.00137166 | 0.02873999 |
| LINC02817 | -3.8151247 | 0.0013813  | 0.02873999 |
| HMG2N2P18 | -5.7490246 | 0.00138187 | 0.02873999 |
| RPL21P123 | 2.30336147 | 0.00137591 | 0.02873999 |
| BCAN-AS1  | -2.2045813 | 0.0013797  | 0.02873999 |
| CLIC4     | 1.6529876  | 0.00139147 | 0.02889106 |
| SNORC     | -2.5650498 | 0.00139174 | 0.02889106 |
| TEX55     | -5.4376959 | 0.00140557 | 0.02915075 |
| ATP13A5   | -2.220923  | 0.00141948 | 0.02941177 |
| OR8D4     | -3.6619448 | 0.00142223 | 0.02944107 |
| KRT16P6   | -3.8687951 | 0.00142637 | 0.02945624 |
| IL12RB2   | 2.13838179 | 0.00142829 | 0.02945624 |
| UCN2      | -3.0692215 | 0.0014275  | 0.02945624 |
| CYP4B1    | 1.58633688 | 0.00142562 | 0.02945624 |
| PRDM9     | -3.1891042 | 0.00143898 | 0.02961269 |
| DIRAS1    | -2.1567392 | 0.001441   | 0.02961269 |
| GPR161    | -1.6202492 | 0.00144123 | 0.02961269 |
| OR6N2     | -5.4885507 | 0.00143867 | 0.02961269 |
| POLH-AS1  | -4.4085767 | 0.00144885 | 0.02974184 |
| SPDYE6    | -4.3092585 | 0.00145234 | 0.02978584 |
| LTA4H     | 1.28737306 | 0.00145568 | 0.02982658 |
| ASS1P6    | -4.9500577 | 0.00146077 | 0.02987553 |
| C8orf86   | -4.0364835 | 0.00146032 | 0.02987553 |
| LINC02582 | -4.4561661 | 0.00146925 | 0.02995091 |
| AHNAK2    | -1.718579  | 0.00147635 | 0.02995091 |
| PRDM1     | 1.72223806 | 0.0014769  | 0.02995091 |
| KDM4F     | -4.6353604 | 0.00147591 | 0.02995091 |
| PRDX3     | 1.5063589  | 0.00147799 | 0.02995091 |
| AGGF1P8   | -4.3096239 | 0.00147431 | 0.02995091 |
| DPP3P1    | -4.4366806 | 0.00146912 | 0.02995091 |
| SMO       | -1.8218693 | 0.00147301 | 0.02995091 |

|           |            |            |            |
|-----------|------------|------------|------------|
| CTAGE9    | -4.8349278 | 0.00147767 | 0.02995091 |
| CD28      | 1.91482403 | 0.00147715 | 0.02995091 |
| KCNQ5-DT  | -3.5805531 | 0.00148139 | 0.02999239 |
| MMP2      | 1.37886975 | 0.00148471 | 0.03003222 |
| CTSZ      | 1.46498897 | 0.00149461 | 0.03017723 |
| PDE7A     | 1.59011451 | 0.00149452 | 0.03017723 |
| FBXO39    | -3.0013534 | 0.00149817 | 0.0302106  |
| OR2V2     | -3.57447   | 0.00149899 | 0.0302106  |
| FAM95C    | -1.8391723 | 0.0015019  | 0.03024165 |
| C5orf15   | 1.59127565 | 0.00150537 | 0.03028395 |
| ADRA2B    | -2.5016896 | 0.00150804 | 0.03031009 |
| CDR2-DT   | -2.850113  | 0.00151971 | 0.03051695 |
| ANP32BP3  | -3.9951823 | 0.00152806 | 0.03065671 |
| GOLGA6A   | -3.2734754 | 0.00153376 | 0.03071545 |
| FERMT3    | 1.88636646 | 0.00153241 | 0.03071545 |
| NTRK2     | -1.4052245 | 0.00153807 | 0.03077384 |
| TOPAZ1    | -4.7263532 | 0.00154382 | 0.03086111 |
| SVIP      | 1.80877672 | 0.00154528 | 0.03086239 |
| CHMP2B    | 1.51216627 | 0.00155181 | 0.03096491 |
| ADAM23    | -1.7142391 | 0.00155646 | 0.03097386 |
| SEMA3F    | -1.4435467 | 0.00155496 | 0.03097386 |
| SNORA74A  | 2.70870378 | 0.00155627 | 0.03097386 |
| SDK2      | -1.9721421 | 0.00156521 | 0.03111998 |
| NSA2      | 1.53374024 | 0.00157013 | 0.03118982 |
| SCLT1     | 1.71754473 | 0.00157379 | 0.03123447 |
| RNU1-11P  | 5.2289286  | 0.0015865  | 0.03145844 |
| RPS2P7    | -5.4598626 | 0.00159655 | 0.0315609  |
| LINGO1    | -1.9513095 | 0.00159408 | 0.0315609  |
| HSPB6     | 2.01244112 | 0.00159737 | 0.0315609  |
| CCR1      | 1.8779805  | 0.00159482 | 0.0315609  |
| GBP4      | 1.77029584 | 0.0016014  | 0.03161227 |
| BTN3A1    | 1.59055022 | 0.00160299 | 0.03161548 |
| HOXA10-AS | -3.5969336 | 0.00160716 | 0.03164124 |
| FMO5      | 1.67045743 | 0.00160601 | 0.03164124 |
| LINC00638 | -2.2174348 | 0.00161233 | 0.03165459 |
| ANHX      | -3.5316727 | 0.00161283 | 0.03165459 |
| LMO3      | 1.59488473 | 0.00160996 | 0.03165459 |
| RBFOX3    | -2.7733334 | 0.00161356 | 0.03165459 |
| MAOB      | 1.98336223 | 0.00162161 | 0.03178232 |
| RHBDD3    | -1.6792124 | 0.00162438 | 0.03178232 |
| MAPT-AS1  | -3.2442869 | 0.00162361 | 0.03178232 |
| SNORA81   | 3.87437197 | 0.00162662 | 0.03179812 |

|            |            |            |            |
|------------|------------|------------|------------|
| F13A1      | 1.61715803 | 0.00162836 | 0.03180396 |
| RAB31      | 1.42926806 | 0.00164059 | 0.03201468 |
| OTOP3      | -4.2219521 | 0.00164625 | 0.0320968  |
| SLC30A7    | 1.34672989 | 0.00164941 | 0.03210178 |
| OR10A6     | -3.6031723 | 0.00164919 | 0.03210178 |
| LINC00661  | -3.7752739 | 0.00166592 | 0.03239468 |
| ANKRD18DP  | -2.9172784 | 0.0016674  | 0.03239505 |
| KLHL13     | -2.3640228 | 0.00167095 | 0.03240702 |
| REG3G      | -5.3474033 | 0.00166991 | 0.03240702 |
| DMXL2      | 1.3808957  | 0.0016746  | 0.03244938 |
| UBTFL8     | -4.9433875 | 0.00167964 | 0.03251857 |
| CBX1P5     | -4.0216553 | 0.00168362 | 0.03256718 |
| PAX6       | -2.5409487 | 0.00168969 | 0.03265606 |
| LINC01007  | -4.7311639 | 0.00169181 | 0.03266844 |
| IGHV3-74   | 2.73365463 | 0.00169726 | 0.03271658 |
| TMEM78     | -5.3563707 | 0.00169595 | 0.03271658 |
| CYLD       | 1.59573946 | 0.00170259 | 0.03276234 |
| NR2E3      | -2.7045043 | 0.00170204 | 0.03276234 |
| OR5AS1     | -2.866243  | 0.00170826 | 0.03284278 |
| IFIT3      | 1.51875326 | 0.00171192 | 0.03288452 |
| SYT9       | -3.0011648 | 0.0017139  | 0.03289413 |
| TMCO5A     | -4.2335438 | 0.00171923 | 0.03296784 |
| MCM3AP-AS1 | -1.6721532 | 0.00172412 | 0.0330302  |
| TIMP3      | 1.54264581 | 0.00172905 | 0.0330302  |
| LRRC37A5P  | -3.8901329 | 0.00172908 | 0.0330302  |
| C1orf54    | 2.22846477 | 0.00172888 | 0.0330302  |
| MAPT       | -2.2641213 | 0.00173005 | 0.0330302  |
| LHX5       | -2.9089504 | 0.00173144 | 0.0330302  |
| GEM        | 1.86106723 | 0.00173823 | 0.03313119 |
| REEP3      | 1.31667078 | 0.00174345 | 0.03318542 |
| LINC00221  | -3.5821922 | 0.00174628 | 0.03318542 |
| INPP5D     | 1.6640147  | 0.00175031 | 0.03318542 |
| NEFHP1     | -2.5581897 | 0.00175062 | 0.03318542 |
| USP31      | -1.3646212 | 0.00175157 | 0.03318542 |
| TMEM221    | -3.9493938 | 0.00174629 | 0.03318542 |
| FBXO40     | -2.6534784 | 0.00174722 | 0.03318542 |
| SOX11      | -2.523015  | 0.00175363 | 0.03319604 |
| HCP5       | 1.46096897 | 0.00176148 | 0.03331605 |
| MYO18B-AS1 | -3.0578388 | 0.00176529 | 0.03335952 |
| STK10      | 1.69569691 | 0.0017685  | 0.03339176 |
| CTSO       | 1.53965659 | 0.00177201 | 0.03340111 |
| SPOCK2     | 1.58013296 | 0.00177105 | 0.03340111 |

|            |            |            |            |
|------------|------------|------------|------------|
| PER3       | 1.3038121  | 0.00177844 | 0.03349366 |
| DCK        | 1.4606909  | 0.00178252 | 0.03354205 |
| ZIC1       | -1.748416  | 0.00179035 | 0.03366078 |
| RAC2       | 1.81568774 | 0.00179283 | 0.03367863 |
| ANP32BP1   | -2.6589209 | 0.00180023 | 0.03378911 |
| SNX3       | 1.35698995 | 0.00180889 | 0.03390339 |
| CTLA4      | 2.18031902 | 0.00180939 | 0.03390339 |
| SEMA5B     | -1.8176628 | 0.00181447 | 0.03396984 |
| ODAPH      | -3.6302247 | 0.00182676 | 0.03414221 |
| CASP4      | 1.50448106 | 0.00182646 | 0.03414221 |
| IGHV3-33   | 1.93134016 | 0.00183491 | 0.03423675 |
| LCP2       | 1.74328221 | 0.00183369 | 0.03423675 |
| RPL22P1    | 1.64654554 | 0.00184488 | 0.03433587 |
| HLA-DOA    | 1.77867066 | 0.00184459 | 0.03433587 |
| GALR2      | -4.5613348 | 0.0018427  | 0.03433587 |
| ERVW-1     | -2.9511893 | 0.00185354 | 0.03441906 |
| RAB20      | 1.45170446 | 0.00185402 | 0.03441906 |
| NECTIN1    | -1.8399053 | 0.0018518  | 0.03441906 |
| UCP2       | 1.47827337 | 0.0018632  | 0.03455116 |
| LINC02487  | -3.1013055 | 0.00186425 | 0.03455116 |
| WASHC2A    | 1.31528481 | 0.00186786 | 0.03458908 |
| LINC01581  | -4.1056885 | 0.00187095 | 0.03461734 |
| NOTCH1     | -1.1990124 | 0.0018791  | 0.0347391  |
| GTF2IRD2P1 | -3.5071551 | 0.00188389 | 0.03479842 |
| MICOS10    | 1.81128823 | 0.00189029 | 0.03488766 |
| LINC00426  | 2.15815814 | 0.00191412 | 0.03527095 |
| KIF19      | -1.9979854 | 0.00191425 | 0.03527095 |
| TMEM154    | 1.32480071 | 0.00191921 | 0.0353035  |
| UBD        | 1.99574284 | 0.00191792 | 0.0353035  |
| MTMR6      | 1.63359169 | 0.00192272 | 0.03533871 |
| TBC1D29P   | -2.7136786 | 0.00193122 | 0.03546555 |
| SMIM14     | 1.35758408 | 0.00193339 | 0.03546678 |
| UBTFL5     | -4.3426393 | 0.00193449 | 0.03546678 |
| RCCD1      | -1.4853769 | 0.00194224 | 0.03557933 |
| NRBF2P6    | -2.9469485 | 0.00194535 | 0.03560688 |
| PTGIS      | 1.94063223 | 0.00195219 | 0.03570247 |
| EEF1A1P6   | 1.73392239 | 0.00195593 | 0.03574138 |
| WAS        | 1.75175243 | 0.00195761 | 0.03574255 |
| PPM1E      | -2.4066072 | 0.00196183 | 0.03576042 |
| PTPRD-AS1  | -2.0792712 | 0.00196412 | 0.03576042 |
| VN1R11P    | -3.5157221 | 0.00196462 | 0.03576042 |
| TERC       | -2.0131812 | 0.00196505 | 0.03576042 |

|             |            |            |            |
|-------------|------------|------------|------------|
| GBP1        | 1.55201239 | 0.00197192 | 0.03585588 |
| KLF7P1      | -4.475182  | 0.00197586 | 0.03589803 |
| FTLP3       | 2.61022313 | 0.00198523 | 0.03600908 |
| NRXN3       | -1.4390829 | 0.00198509 | 0.03600908 |
| C1S         | 1.43965501 | 0.00199191 | 0.03610065 |
| PRB2        | -2.8014167 | 0.00199622 | 0.03611965 |
| CEBPB       | 1.21471826 | 0.00199503 | 0.03611965 |
| CHRN2       | -2.8234015 | 0.00199816 | 0.03612523 |
| SLC46A3     | 1.8548077  | 0.0020035  | 0.0361923  |
| PRPH        | -3.1963797 | 0.0020058  | 0.03620414 |
| NSMCE1-DT   | -2.0737481 | 0.00201196 | 0.03628581 |
| CACNA2D3    | -1.8037385 | 0.00201507 | 0.03630113 |
| KLHL29      | -1.4310055 | 0.00201609 | 0.03630113 |
| C12orf56    | -2.6194412 | 0.00202333 | 0.03640181 |
| SLC30A3     | -3.009198  | 0.00202616 | 0.03642309 |
| KLRG2       | -2.4683777 | 0.00203864 | 0.03661093 |
| OPN5        | -3.6027269 | 0.00204088 | 0.03661093 |
| HNRNPA1P2   | -2.7776686 | 0.00204157 | 0.03661093 |
| IGHV4-34    | 2.32951473 | 0.00204817 | 0.03666991 |
| HOXC8       | -2.0097336 | 0.002048   | 0.03666991 |
| SRPK3       | -2.7081234 | 0.00205387 | 0.03671249 |
| DMRT3       | -2.5448821 | 0.00205317 | 0.03671249 |
| TSBP1       | -2.6401556 | 0.00205664 | 0.03673244 |
| PLAAT4      | 1.58905329 | 0.0020656  | 0.03683288 |
| UBE2W       | 1.25947912 | 0.00206407 | 0.03683288 |
| PLPP1       | 2.02555617 | 0.00206782 | 0.03684285 |
| MARK2P16    | -3.735282  | 0.00207626 | 0.03696339 |
| AKNA        | 1.44990006 | 0.00209428 | 0.03722428 |
| PEX5L       | -1.9658778 | 0.00209316 | 0.03722428 |
| MMP19       | 1.60728382 | 0.00210265 | 0.03734308 |
| CHCHD4P2    | -4.5760913 | 0.00211641 | 0.03734768 |
| PKD1        | -1.192183  | 0.00211067 | 0.03734768 |
| FBXW7       | 1.60409494 | 0.00211484 | 0.03734768 |
| SNX18P3     | -1.6739961 | 0.00210544 | 0.03734768 |
| RNF14P4     | -3.4649855 | 0.00211196 | 0.03734768 |
| FOXL2NB     | -2.5595174 | 0.00211636 | 0.03734768 |
| CD300LD-AS1 | -4.1844066 | 0.00210813 | 0.03734768 |
| KIF3C       | -1.4798714 | 0.00210933 | 0.03734768 |
| BMP2K       | 1.47760793 | 0.00212223 | 0.03739079 |
| CDC42SE2    | 1.57356614 | 0.00212184 | 0.03739079 |
| PTGER2      | 2.20791053 | 0.00213031 | 0.03747341 |
| NETO2       | -1.758804  | 0.00212876 | 0.03747341 |

|                 |            |            |            |
|-----------------|------------|------------|------------|
| NT5C1B          | -3.8985617 | 0.00214399 | 0.0376842  |
| PDGFC           | 1.50026106 | 0.00215689 | 0.03785536 |
| EVPL            | -1.4984486 | 0.00215715 | 0.03785536 |
| MAPK8IP2        | -2.2597264 | 0.00216007 | 0.03787647 |
| GAREM2          | -1.8892399 | 0.00216482 | 0.03792976 |
| GNLY            | 1.88104091 | 0.00217479 | 0.03807428 |
| SPECC1L-ADORA2A | -10.245196 | 0.0021792  | 0.03809126 |
| CASS4           | 1.72746423 | 0.00217914 | 0.03809126 |
| SNORA7A         | 2.18402238 | 0.00218191 | 0.03810852 |
| BSN-DT          | -2.5542592 | 0.00218403 | 0.03811552 |
| TLR3            | 1.62679465 | 0.00218595 | 0.03811893 |
| KIAA0895LP1     | -3.3368292 | 0.00220448 | 0.03839278 |
| POLR1G          | -1.6633289 | 0.00220513 | 0.03839278 |
| LIFR            | 1.57939989 | 0.00221128 | 0.03846965 |
| ADORA2A-AS1     | -3.3675808 | 0.00221729 | 0.03854384 |
| OR10H5          | -3.0075506 | 0.00222137 | 0.03858461 |
| TCEAL8          | 1.74762922 | 0.00222699 | 0.03864896 |
| IGLV2-23        | 1.83390897 | 0.00222857 | 0.03864896 |
| RAB6B           | -1.7997353 | 0.00223324 | 0.0386996  |
| L3MBTL2-AS1     | -1.9315469 | 0.00224134 | 0.03877915 |
| PPP1R13B-DT     | -3.4942764 | 0.00224024 | 0.03877915 |
| SAR1A           | 1.41748394 | 0.00224378 | 0.03878219 |
| C11orf96        | 1.81719673 | 0.00224677 | 0.03878219 |
| SELENOF         | 1.71350085 | 0.00224603 | 0.03878219 |
| MT1E            | 2.70326585 | 0.00225134 | 0.03883073 |
| SOX15           | -2.902963  | 0.00225726 | 0.0388824  |
| GIMAP5          | 1.80369816 | 0.00225785 | 0.0388824  |
| ROPN1B          | -2.5492474 | 0.0022608  | 0.03890295 |
| HOGA1           | -2.1835825 | 0.00227261 | 0.0390008  |
| OR4G1P          | -5.5232782 | 0.0022721  | 0.0390008  |
| SAMD3           | 2.0137249  | 0.00227075 | 0.0390008  |
| CSRNP1          | 1.55280268 | 0.00227619 | 0.0390008  |
| RPL23AP87       | -2.7864147 | 0.00227729 | 0.0390008  |
| PPM1B-DT        | -3.0937814 | 0.00227882 | 0.0390008  |
| CSDE1           | 1.36752361 | 0.00227648 | 0.0390008  |
| SRP72P1         | -4.356701  | 0.00229155 | 0.03910925 |
| TSPAN13         | 1.53611278 | 0.00229329 | 0.03910925 |
| GABRE           | -1.4853772 | 0.00229399 | 0.03910925 |
| KNOP1P4         | -2.5481344 | 0.00229249 | 0.03910925 |
| PTAFR           | 1.72831498 | 0.0022921  | 0.03910925 |
| MMRN1           | 1.66772519 | 0.00230199 | 0.03914697 |
| ADH1C           | 3.38292575 | 0.00230474 | 0.03914697 |

|              |            |            |            |
|--------------|------------|------------|------------|
| LINC02833    | -4.4742747 | 0.00231744 | 0.03914697 |
| SLC13A5      | -2.7599145 | 0.00231725 | 0.03914697 |
| XRCC6P1      | -5.1019415 | 0.00231582 | 0.03914697 |
| WDR72        | -2.0476947 | 0.00231082 | 0.03914697 |
| SLC7A7       | 1.65402215 | 0.00231101 | 0.03914697 |
| NTN4         | 1.40704071 | 0.00231046 | 0.03914697 |
| AKAP13       | 1.2040778  | 0.00231636 | 0.03914697 |
| RRN3P4       | -3.9435795 | 0.00230343 | 0.03914697 |
| SULT1A4      | -3.8731011 | 0.00231494 | 0.03914697 |
| CXCL16       | 1.79340282 | 0.00230584 | 0.03914697 |
| TENT5A       | 1.36517326 | 0.00232727 | 0.03924729 |
| SERPINB9     | 1.59450067 | 0.0023287  | 0.03924729 |
| ZNF286B      | -1.7167929 | 0.00232807 | 0.03924729 |
| KIF18B       | -1.7981798 | 0.0023319  | 0.03927138 |
| TVP23C-CDRT4 | -2.4440399 | 0.00234342 | 0.03943533 |
| TBC1D8-AS1   | -2.148924  | 0.00235178 | 0.03954609 |
| LINC01641    | -3.8761692 | 0.00235485 | 0.03956755 |
| FRG2LP       | -4.3994636 | 0.00235955 | 0.03961637 |
| LINC02128    | -4.6797077 | 0.00236342 | 0.03965134 |
| AP1S2        | 1.90472851 | 0.00237193 | 0.03976094 |
| KCNK9        | -2.8769873 | 0.00237355 | 0.03976094 |
| IGLV3-10     | 3.2070047  | 0.00237765 | 0.0397996  |
| FBLN5        | 1.4008123  | 0.00238196 | 0.03981314 |
| TUBG1P       | -3.8614929 | 0.00238206 | 0.03981314 |
| CD14         | 1.98453551 | 0.00239508 | 0.04000062 |
| TSBP1-AS1    | -1.7995099 | 0.00241086 | 0.04023369 |
| KRT17        | -1.4839448 | 0.00241282 | 0.04023603 |
| ST13P7       | -3.3298602 | 0.00241604 | 0.04025942 |
| FOXM1        | -1.7077943 | 0.00242404 | 0.04036239 |
| LINC01391    | -3.3744652 | 0.00243186 | 0.04046217 |
| CCDC140      | -3.5557151 | 0.00243503 | 0.04048448 |
| KRT8P12      | -1.6515303 | 0.00243777 | 0.04049956 |
| E2F7         | -1.6908691 | 0.00244052 | 0.04051479 |
| RARS1P1      | -4.3777938 | 0.00244498 | 0.04052806 |
| PDCD4        | 1.1615377  | 0.00244498 | 0.04052806 |
| NAMPT        | 1.38938677 | 0.00244847 | 0.04055554 |
| CFHR4        | -5.5778174 | 0.00245143 | 0.04057418 |
| FAM230H      | -2.9242149 | 0.00245616 | 0.04062201 |
| CALCRL       | 1.65432473 | 0.00246522 | 0.04068055 |
| OR4Q2        | -4.0471012 | 0.00246616 | 0.04068055 |
| HOXA11       | -3.3437164 | 0.00246705 | 0.04068055 |
| BHLHE41      | 1.82800045 | 0.00246605 | 0.04068055 |



|              |            |            |            |
|--------------|------------|------------|------------|
| CCL3         | 2.15819722 | 0.00249369 | 0.04108918 |
| CXCR3        | 2.21754724 | 0.0024959  | 0.041095   |
| KRT8P24      | -3.828813  | 0.00249812 | 0.04110105 |
| RNF144B      | 1.44556729 | 0.00250418 | 0.04117015 |
| RNASEH1P1    | -5.1507068 | 0.00250893 | 0.04119807 |
| FYB1         | 1.80281681 | 0.0025096  | 0.04119807 |
| NANOGP1      | -4.4265875 | 0.00251925 | 0.04129514 |
| ATXN3L       | -4.4279013 | 0.00251844 | 0.04129514 |
| FKBP4P2      | -4.2202598 | 0.00252624 | 0.04134846 |
| DSPP         | -2.95396   | 0.00252461 | 0.04134846 |
| TPSAB1       | 1.776504   | 0.00253849 | 0.04151823 |
| LPIN2        | 1.26086186 | 0.00254059 | 0.04152197 |
| LINC02687    | -4.3663553 | 0.00254283 | 0.04152796 |
| ZFP36        | 1.37513717 | 0.0025543  | 0.04168446 |
| OLFML2A      | -1.3346919 | 0.00256359 | 0.0418052  |
| NDUFA5       | 1.35838824 | 0.00256811 | 0.04184802 |
| DDX3ILA1     | -2.5033504 | 0.00257792 | 0.04197703 |
| SPRN         | -2.4980859 | 0.00258238 | 0.04201873 |
| LINC00703    | -3.3750072 | 0.00258793 | 0.04207819 |
| SFT2D1       | 1.7974212  | 0.00259542 | 0.04216891 |
| OTUD4P1      | -2.8655605 | 0.00260706 | 0.04231364 |
| INSYN1       | -2.4361384 | 0.00260815 | 0.04231364 |
| MYCL-AS1     | -5.0625188 | 0.00262362 | 0.0425023  |
| GNS          | 1.19817675 | 0.00262347 | 0.0425023  |
| SNORA5A      | 2.75469482 | 0.00262921 | 0.04252594 |
| ARID5B       | 1.1646564  | 0.00263085 | 0.04252594 |
| EPHA7        | -2.2972136 | 0.0026282  | 0.04252594 |
| SEC24A       | 1.48353018 | 0.00263876 | 0.04262267 |
| C3orf86      | -4.2635062 | 0.00265761 | 0.04289585 |
| PLXNB3       | -1.8396364 | 0.00267527 | 0.04314938 |
| PTPRH        | -2.5712506 | 0.00268274 | 0.04323724 |
| CCDC92B      | -3.0540238 | 0.00268462 | 0.04323724 |
| SH3BGRL3     | 1.35334696 | 0.00270405 | 0.04351856 |
| DDX60L       | 1.47214003 | 0.00270635 | 0.04352377 |
| KRT9         | -3.540514  | 0.00271166 | 0.04357759 |
| LUARIS       | -3.5362616 | 0.00271868 | 0.04365862 |
| ST8SIA3      | -2.90015   | 0.00272282 | 0.04369352 |
| SPATA31E2P   | -6.5279942 | 0.00273925 | 0.04392532 |
| EPHB6        | -2.0522236 | 0.00274705 | 0.04401837 |
| COLEC12      | 1.42854875 | 0.00275478 | 0.04411043 |
| PPP1R3G      | -2.355783  | 0.00276364 | 0.04418823 |
| NPHP3-ACAD11 | 5.51241153 | 0.00276244 | 0.04418823 |

|           |            |            |            |
|-----------|------------|------------|------------|
| RBMXP3    | -3.2983755 | 0.00278212 | 0.04438758 |
| CDCA3     | -2.1175722 | 0.0027789  | 0.04438758 |
| KCNH1     | -2.5812585 | 0.00278139 | 0.04438758 |
| GAPT      | 2.29247862 | 0.00279837 | 0.04461468 |
| WNK2      | -1.5757623 | 0.00280196 | 0.04462449 |
| OR10AC1   | -3.6304527 | 0.00280302 | 0.04462449 |
| NWD2      | -3.1212144 | 0.00282404 | 0.04492675 |
| CICP19    | -3.8058815 | 0.00283829 | 0.04512103 |
| PI4K2B    | 1.3752117  | 0.00284369 | 0.04517447 |
| CAMK2N2   | -4.4832047 | 0.00285494 | 0.04528808 |
| PLSCR4    | 1.52364508 | 0.00285339 | 0.04528808 |
| ESPN      | -2.090462  | 0.00286212 | 0.04536957 |
| RTP3      | -5.6016825 | 0.00286451 | 0.04537498 |
| KRT77     | -3.1786249 | 0.00287166 | 0.04542141 |
| SCTR      | 2.41384972 | 0.00287168 | 0.04542141 |
| GBP3      | 1.32768489 | 0.0028736  | 0.04542141 |
| HECA      | 1.31952883 | 0.00288337 | 0.04554327 |
| TLR7      | 2.01191899 | 0.0028929  | 0.04566119 |
| OPRK1     | -2.8119561 | 0.00290021 | 0.04574397 |
| LINC01902 | -2.4309308 | 0.00291497 | 0.04590501 |
| SNORA23   | 1.77711356 | 0.00291669 | 0.04590501 |
| FEZF1-AS1 | -2.10056   | 0.00291586 | 0.04590501 |
| NEXN      | 1.55474597 | 0.00291872 | 0.04590501 |
| OSTM1     | 1.60898831 | 0.00292412 | 0.04595724 |
| IGLV3-19  | 1.98222049 | 0.00293137 | 0.04600588 |
| SUCLG2    | 1.34181263 | 0.00292934 | 0.04600588 |
| ATF4P1    | -3.7622931 | 0.00293357 | 0.0460078  |
| SLC41A2   | 1.27657087 | 0.00294658 | 0.04617904 |
| CCL14     | 2.10628303 | 0.00297113 | 0.04636993 |
| LINC02011 | -5.0178921 | 0.00297264 | 0.04636993 |
| ADAM11    | -2.3073425 | 0.00297341 | 0.04636993 |
| GREM1-AS1 | -4.2835671 | 0.00297343 | 0.04636993 |
| TASOR     | 1.29518153 | 0.00296897 | 0.04636993 |
| COL6A6    | 2.0297719  | 0.002972   | 0.04636993 |
| NOTCH2    | 1.24095417 | 0.00297145 | 0.04636993 |
| MIR7515HG | -3.3618208 | 0.00298302 | 0.04648678 |
| COTL1P1   | -3.8002531 | 0.0030029  | 0.04648967 |
| SLC18B1   | 2.24127226 | 0.00299711 | 0.04648967 |
| LMAN1L    | -3.1806942 | 0.0029929  | 0.04648967 |
| ENOX1-AS1 | -3.4239834 | 0.0029854  | 0.04648967 |
| RPL34     | 1.54517668 | 0.00300421 | 0.04648967 |
| DIRC3     | -1.9551469 | 0.00300194 | 0.04648967 |

|               |            |            |            |
|---------------|------------|------------|------------|
| NRXN2         | -2.2834261 | 0.00299661 | 0.04648967 |
| RBFOX1        | -3.1221423 | 0.00300391 | 0.04648967 |
| FBXO41        | -1.3413033 | 0.00299997 | 0.04648967 |
| EEF1GP4       | -5.2061564 | 0.00300103 | 0.04648967 |
| GTSE1         | -1.9353676 | 0.00301127 | 0.04656636 |
| TYRO3         | -1.6535809 | 0.00302398 | 0.04660006 |
| APOLD1        | 1.36013802 | 0.00301575 | 0.04660006 |
| SIX5          | -1.569733  | 0.00301901 | 0.04660006 |
| SCARNA5       | 1.43833631 | 0.00302184 | 0.04660006 |
| CFLAR         | 1.28178919 | 0.00302309 | 0.04660006 |
| SBF1P1        | -3.0246559 | 0.00303459 | 0.04673099 |
| GTPBP3        | -1.5369234 | 0.00303955 | 0.04677477 |
| TSPY3         | -3.0493071 | 0.00306822 | 0.04692239 |
| HMSD          | -2.682176  | 0.0030624  | 0.04692239 |
| CRMP1         | -1.6829689 | 0.00305922 | 0.04692239 |
| DPP6          | -2.2813532 | 0.00306781 | 0.04692239 |
| LINC00602     | -5.4103023 | 0.00305926 | 0.04692239 |
| CCNG1         | 1.48605245 | 0.00305165 | 0.04692239 |
| PRKCH         | 1.42317277 | 0.00306468 | 0.04692239 |
| TRIM49D1      | -5.0457924 | 0.0030669  | 0.04692239 |
| SCAND2P       | -1.2150187 | 0.00306296 | 0.04692239 |
| LINC01721     | -5.4663074 | 0.00307819 | 0.04697204 |
| IGBP1P4       | -3.1467977 | 0.00307516 | 0.04697204 |
| LTB4R2        | -1.5684993 | 0.00307873 | 0.04697204 |
| HINT1         | 1.32322225 | 0.00308208 | 0.04697204 |
| GOLGA6B       | -5.4757334 | 0.00308161 | 0.04697204 |
| EGR4          | -5.0000398 | 0.00308913 | 0.04704707 |
| PRIMA1        | -2.0822555 | 0.00309773 | 0.04709675 |
| KRT18P66      | -4.5349147 | 0.00310061 | 0.04709675 |
| SLC7A13       | -5.0249929 | 0.00310067 | 0.04709675 |
| UBLCP1        | 1.64743794 | 0.00310091 | 0.04709675 |
| PIK3CG        | 1.7555506  | 0.00310651 | 0.0471495  |
| AFF3          | 1.45605491 | 0.00311062 | 0.04717953 |
| TRPV6         | -2.2207929 | 0.00311329 | 0.04718766 |
| JMJD7-PLA2G4B | -1.5000472 | 0.00311725 | 0.04719915 |
| NMRAL2P       | -1.8261487 | 0.00311831 | 0.04719915 |
| SPARC         | 1.45369136 | 0.00312446 | 0.04725982 |
| ISL1-DT       | -2.6199917 | 0.00313165 | 0.04729969 |
| CCDC103       | -2.4988124 | 0.00312939 | 0.04729969 |
| POM121L2      | -3.332281  | 0.00313497 | 0.04729969 |
| WIPF1         | 1.49349432 | 0.00313778 | 0.04729969 |
| FUCA1         | 1.81475235 | 0.00313701 | 0.04729969 |

|           |            |            |            |
|-----------|------------|------------|------------|
| OGFRL1    | 1.23973017 | 0.00314957 | 0.04742889 |
| LINC02897 | -2.9582616 | 0.00315064 | 0.04742889 |
| CAPZA1    | 1.15082908 | 0.00315313 | 0.0474341  |
| STOM      | 1.41311054 | 0.00317327 | 0.04770471 |
| CLEC18B   | -2.891728  | 0.00317669 | 0.04772374 |
| MAFB      | 1.35269122 | 0.0031921  | 0.04792259 |
| CNN3      | 1.35622664 | 0.00319613 | 0.04795062 |
| ACTA2     | 1.40122926 | 0.00320107 | 0.04799218 |
| GNPTAB    | 1.21430888 | 0.00320417 | 0.04800613 |
| GRIN2A    | -2.1547797 | 0.00320878 | 0.04804262 |
| MAP3K8    | 1.3918551  | 0.00321709 | 0.04813452 |
| MALL      | 1.36555812 | 0.00322848 | 0.04827231 |
| FBF1      | -1.349511  | 0.00323101 | 0.04827754 |
| CMKLR1    | 1.75510334 | 0.00323407 | 0.04829066 |
| RAB6A     | 1.20234623 | 0.00325752 | 0.04860796 |
| PCDH19    | -1.7023646 | 0.00326385 | 0.04866971 |
| CAPZB     | 1.27476647 | 0.00326874 | 0.04870969 |
| CYP3A7    | -4.4055408 | 0.00327839 | 0.04882071 |
| E2F6P3    | -3.475707  | 0.00328643 | 0.04887464 |
| MRGPRX3   | -4.3996882 | 0.00328588 | 0.04887464 |
| CRYBG1    | 1.15304086 | 0.00329217 | 0.04892712 |
| PLAC8     | 1.51902132 | 0.00330386 | 0.04893658 |
| KIAA0040  | 1.54155385 | 0.00330161 | 0.04893658 |
| RAD23BP1  | -3.5488633 | 0.00329758 | 0.04893658 |
| TUBB8P11  | -4.5940118 | 0.00330387 | 0.04893658 |
| PNRC2     | 1.20182696 | 0.00329526 | 0.04893658 |
| PPP1R3A   | -3.0737864 | 0.00331222 | 0.04899466 |
| ANP32D    | -3.2254539 | 0.00331066 | 0.04899466 |
| LINC02204 | -2.7610406 | 0.00331896 | 0.04902892 |
| CYP2B7P   | 1.57217358 | 0.00331862 | 0.04902892 |
| NPHP3-AS1 | -3.2198566 | 0.00333147 | 0.04918092 |
| SEC22B    | 1.24660686 | 0.00333444 | 0.04919187 |
| SH2D5     | -3.6819541 | 0.00333975 | 0.04923739 |
| SLC30A2   | -3.5024716 | 0.00334616 | 0.04926627 |
| FMO6P     | -2.0117925 | 0.00334458 | 0.04926627 |
| SLC9A2    | -2.1968727 | 0.0033559  | 0.04935712 |
| SDC3      | 1.21779742 | 0.00335679 | 0.04935712 |
| RNU12     | 2.71184416 | 0.0033632  | 0.04941844 |
| AREG      | 2.06517717 | 0.00338218 | 0.0495828  |
| STAG1-DT  | -3.2928274 | 0.003378   | 0.0495828  |
| TUBAP14   | -3.9865657 | 0.00338334 | 0.0495828  |
| MCEMP1    | 2.76890634 | 0.0033789  | 0.0495828  |

|            |            |            |            |
|------------|------------|------------|------------|
| SLPI       | 2.04577776 | 0.00339117 | 0.04963169 |
| IFITM3     | 1.26466354 | 0.0033903  | 0.04963169 |
| TINCR      | -2.203321  | 0.00339365 | 0.0496352  |
| CSNKA2IP   | -4.545598  | 0.0033973  | 0.04965578 |
| MUC5AC     | -2.0881726 | 0.00340158 | 0.04968547 |
| IGFBP7     | 1.4403821  | 0.00340787 | 0.04974461 |
| LAD1       | -1.874805  | 0.00341432 | 0.04980584 |
| CKAP2P1    | -4.1662731 | 0.00342944 | 0.04996062 |
| AZGP1P1    | -4.779567  | 0.00342775 | 0.04996062 |
| SPCS3      | 1.50038016 | 0.00344916 | 0.05021472 |
| FAM205A    | -3.7651652 | 0.00347918 | 0.05058026 |
| TMEM59     | 1.21360319 | 0.00347663 | 0.05058026 |
| HNRNPA1P23 | -2.9261583 | 0.00348112 | 0.05058026 |
| RAET1L     | -3.8200924 | 0.00348563 | 0.05061248 |
| FXYD5      | 1.39982356 | 0.0034936  | 0.05069497 |
| SNORA3B    | 4.44850792 | 0.00350034 | 0.05075952 |
| TUBBP6     | -3.8450287 | 0.00351578 | 0.05095003 |
| G6PC2      | -3.592339  | 0.00352743 | 0.05108547 |
| NAMA       | -3.0326124 | 0.00353769 | 0.05120055 |
| RABEP2     | -1.3124995 | 0.00354144 | 0.05122121 |
| FUT8       | 1.49784992 | 0.00354456 | 0.0512329  |
| NKX3-2     | -4.0489447 | 0.00354724 | 0.05123821 |
| TMEM100    | 2.16043122 | 0.00355022 | 0.05124777 |
| S100A8     | 2.40532995 | 0.00355274 | 0.05125074 |
| FLI1       | 1.81049041 | 0.00356767 | 0.05138433 |
| ZDHHC20    | 1.40440354 | 0.00357129 | 0.05138433 |
| GNG2       | 1.76911709 | 0.00356513 | 0.05138433 |
| GNG5       | 1.30090181 | 0.00357073 | 0.05138433 |
| CROCC2     | -1.6403522 | 0.00357719 | 0.05143582 |
| ZNF219     | -1.3790134 | 0.00359119 | 0.05147784 |
| LCN15      | -4.4537641 | 0.00358966 | 0.05147784 |
| FPR3       | 1.68732452 | 0.00358611 | 0.05147784 |
| OR7D4      | -3.6853447 | 0.0035855  | 0.05147784 |
| MLLT11     | -1.6079409 | 0.00359175 | 0.05147784 |
| ACTB       | 1.26377482 | 0.00359791 | 0.05149943 |
| HOXA10     | -2.2532283 | 0.00359568 | 0.05149943 |
| GCM2       | -3.7109184 | 0.00361772 | 0.05174957 |
| BTLA       | 1.90986623 | 0.00362683 | 0.05181289 |
| NDUFS5     | 1.74263198 | 0.0036267  | 0.05181289 |
| MAP3K1     | 1.34889295 | 0.00363186 | 0.05184627 |
| PRAMEF25   | -4.9001354 | 0.00363385 | 0.05184627 |
| NEFMP1     | -2.9185192 | 0.00364254 | 0.05193677 |

|             |            |            |            |
|-------------|------------|------------|------------|
| RSPO3       | 1.75030301 | 0.00364604 | 0.05195314 |
| LYZ         | 1.88866055 | 0.00365796 | 0.05208945 |
| FTOP1       | -4.0809587 | 0.0036615  | 0.05209062 |
| ADPGK-AS1   | -2.2419959 | 0.00366275 | 0.05209062 |
| C1QBPP1     | -3.7982136 | 0.00367098 | 0.0521406  |
| HNRNPA1P42  | -4.924574  | 0.00367038 | 0.0521406  |
| ZNF22       | 1.75152288 | 0.00367421 | 0.05215301 |
| HLA-DQA2    | 2.32402223 | 0.00367841 | 0.05217921 |
| LHX8        | -3.8747919 | 0.00368248 | 0.05220353 |
| LINC01913   | -3.3928297 | 0.00369007 | 0.05227219 |
| GUSBP14     | -9.7065459 | 0.00369262 | 0.05227219 |
| TSSC2       | -1.8815896 | 0.00369446 | 0.05227219 |
| CIAO2AP2    | -3.6400028 | 0.00369678 | 0.05227219 |
| ERAP2       | 1.49068492 | 0.00370684 | 0.05228079 |
| OR5B3       | -5.101104  | 0.00370532 | 0.05228079 |
| CCDC13-AS1  | -4.542781  | 0.00370235 | 0.05228079 |
| ALDH1L1-AS2 | -3.6668991 | 0.00370555 | 0.05228079 |
| SNRPB2      | 1.4242013  | 0.00371281 | 0.05229844 |
| TTC9B       | -4.2559713 | 0.00371258 | 0.05229844 |
| FLT3        | 2.48505882 | 0.00371866 | 0.05231424 |
| TMBIM4      | 1.40258124 | 0.00371825 | 0.05231424 |
| TLL2        | -2.4150054 | 0.00372788 | 0.05234412 |
| DTX2P1      | -1.8353385 | 0.00372572 | 0.05234412 |
| KLRC1       | 2.99656373 | 0.00372455 | 0.05234412 |
| LCORL       | 1.39047323 | 0.00374145 | 0.05242895 |
| PPFIA3      | -1.8080193 | 0.00373861 | 0.05242895 |
| SPATA41     | -2.0425571 | 0.0037434  | 0.05242895 |
| PELI1       | 1.1747992  | 0.00374298 | 0.05242895 |
| MIR1302-9HG | -2.4732954 | 0.00374668 | 0.05244166 |
| GJA3        | -3.1461214 | 0.00375813 | 0.05256225 |
| PPM1F-AS1   | -1.8357717 | 0.00376005 | 0.05256225 |
| ARSJ        | -1.4089085 | 0.00376762 | 0.05263484 |
| TSIX        | -2.1858439 | 0.00377246 | 0.0526693  |
| TC2N        | 1.3553515  | 0.0037771  | 0.05270084 |
| TIGIT       | 1.94157321 | 0.00378094 | 0.05272114 |
| RHOA        | 1.2292588  | 0.00378428 | 0.05273448 |
| LY86        | 2.36168717 | 0.00379676 | 0.0528454  |
| TDGF1       | -3.1968909 | 0.00379702 | 0.0528454  |
| LINC01516   | -4.6317987 | 0.00380374 | 0.05290022 |
| SLC2A3      | 1.49205446 | 0.00380574 | 0.05290022 |
| GLCCI1      | 1.66445879 | 0.00380861 | 0.05290696 |
| SELENBP1    | 1.54434066 | 0.0038147  | 0.05294583 |

|            |            |            |            |
|------------|------------|------------|------------|
| CASP8      | 1.35063298 | 0.0038162  | 0.05294583 |
| KHDC1-AS1  | -1.4249645 | 0.00382042 | 0.05297122 |
| RPL23      | 1.56400818 | 0.00382792 | 0.05304202 |
| GLI4       | -1.3595335 | 0.00383273 | 0.05304589 |
| HMGB4      | -3.1883398 | 0.003833   | 0.05304589 |
| PJA2       | 1.37525888 | 0.00384466 | 0.05316685 |
| ELFN1      | -2.0631487 | 0.00384654 | 0.05316685 |
| ERP27      | 2.55485831 | 0.00385041 | 0.05318713 |
| TMEM132A   | -1.6380298 | 0.00387602 | 0.05350743 |
| AGGF1P2    | -1.762781  | 0.00388636 | 0.05358336 |
| P2RY13     | 1.75713806 | 0.00388575 | 0.05358336 |
| MAPK4      | -1.9967811 | 0.0038981  | 0.05360381 |
| KIAA0408   | 1.83595544 | 0.00390027 | 0.05360381 |
| MAGEA9B    | -4.0716644 | 0.00389713 | 0.05360381 |
| TXK        | 2.03750051 | 0.00389408 | 0.05360381 |
| ATL3       | 1.43986294 | 0.0039048  | 0.05360381 |
| ZNF469     | -1.4892042 | 0.00390387 | 0.05360381 |
| C4orf54    | -2.3297951 | 0.00389828 | 0.05360381 |
| NLRP3      | 1.5762734  | 0.00391707 | 0.05373894 |
| ELF3-AS1   | -1.6606795 | 0.00393115 | 0.05389866 |
| NUTM2D     | -1.6687339 | 0.00393955 | 0.05398032 |
| MAPK6-DT   | -3.190668  | 0.00394855 | 0.0540368  |
| FGD4       | 1.18147727 | 0.00394797 | 0.0540368  |
| GNG11      | 1.66022746 | 0.00396243 | 0.05409286 |
| KCNA1      | -2.7349457 | 0.00396121 | 0.05409286 |
| KRT37      | -4.4084698 | 0.00395886 | 0.05409286 |
| NR1I3      | -4.771346  | 0.00395714 | 0.05409286 |
| KCNE1      | 1.49710431 | 0.00396652 | 0.05411537 |
| CCDC186    | 1.27036531 | 0.00398161 | 0.05428777 |
| SH3KBP1    | 1.313158   | 0.00398838 | 0.05432187 |
| MUC12      | -2.0558233 | 0.00398902 | 0.05432187 |
| GAS1       | 1.41933824 | 0.00399937 | 0.05437727 |
| EPHA5      | -2.7064851 | 0.00400046 | 0.05437727 |
| SLC13A4    | -1.9646459 | 0.00399827 | 0.05437727 |
| CSGALNACT2 | 1.329124   | 0.00400484 | 0.05440333 |
| MBNL1      | 1.3787853  | 0.0040108  | 0.05445089 |
| PLCXD3     | 1.66086407 | 0.00401744 | 0.05445305 |
| TOMM40P3   | -4.4180315 | 0.00401834 | 0.05445305 |
| RPL5P6     | -3.483928  | 0.00401694 | 0.05445305 |
| PMS2P7     | -1.9033951 | 0.00403274 | 0.05461475 |
| SUCLA2P2   | -4.5345669 | 0.00403575 | 0.05462214 |
| NLRC4      | 2.0400207  | 0.00403947 | 0.05463896 |

|            |            |            |            |
|------------|------------|------------|------------|
| SNX18P7    | -3.2718285 | 0.00404226 | 0.05464334 |
| VHLL       | -4.8530393 | 0.0040474  | 0.05467945 |
| LINC00458  | -4.5932554 | 0.00405484 | 0.05471321 |
| LHFPL2     | 1.36358578 | 0.00405436 | 0.05471321 |
| ACAA2      | 1.4690215  | 0.00407151 | 0.05473777 |
| FAM204CP   | -3.3900352 | 0.00406223 | 0.05473777 |
| IGHV5-51   | 2.20969397 | 0.00406598 | 0.05473777 |
| PTPRCAP    | 1.91962835 | 0.00406757 | 0.05473777 |
| DENND2C    | -1.4075871 | 0.00407114 | 0.05473777 |
| KRT18P37   | -3.4734883 | 0.00406816 | 0.05473777 |
| INKA2-AS1  | -2.741614  | 0.00407452 | 0.05474506 |
| PPTC7      | 1.45677988 | 0.00407956 | 0.05477942 |
| IGHG1      | 1.6446183  | 0.00408778 | 0.05484639 |
| CYFIP2     | 1.4460983  | 0.0040895  | 0.05484639 |
| GPC6       | 1.50708957 | 0.00409789 | 0.05485837 |
| THEMIS3P   | -4.4749208 | 0.00409763 | 0.05485837 |
| SLC25A1P1  | -4.9242254 | 0.00410775 | 0.05485837 |
| IRF8       | 1.6875675  | 0.0041048  | 0.05485837 |
| NAAA       | 1.4592055  | 0.00410678 | 0.05485837 |
| ABCG4      | -2.7773998 | 0.00410539 | 0.05485837 |
| VIM        | 1.40276818 | 0.00410024 | 0.05485837 |
| SETP22     | -3.7150634 | 0.00413402 | 0.05517599 |
| LMLN2      | -3.0043903 | 0.00413827 | 0.05519932 |
| FNDC9      | -5.4539965 | 0.00414175 | 0.05521252 |
| LBX1       | -2.662987  | 0.00414655 | 0.0552432  |
| ALOX12B    | -4.2447644 | 0.00416254 | 0.05542284 |
| XIST       | -2.2146382 | 0.00416571 | 0.05543171 |
| MEI1       | 2.30213375 | 0.00417466 | 0.05547167 |
| CSPG4P11   | -1.7047043 | 0.00417874 | 0.05547167 |
| WNT8A      | -4.8380085 | 0.00417502 | 0.05547167 |
| POLQ       | -1.2833313 | 0.00417632 | 0.05547167 |
| ARHGAP18   | 1.40320066 | 0.00418615 | 0.05553682 |
| CELSR2     | -1.3243947 | 0.0041926  | 0.05555478 |
| RGL1       | 1.36603443 | 0.00419504 | 0.05555478 |
| MAPRE3-AS1 | -3.0526422 | 0.00419338 | 0.05555478 |
| ARID3A     | -1.2853421 | 0.00420904 | 0.05570688 |
| HIPK1      | 1.23808863 | 0.00421653 | 0.05574548 |
| MOCS2      | 1.32948586 | 0.00421774 | 0.05574548 |
| SLC20A1    | 1.10598407 | 0.00421952 | 0.05574548 |
| KRTAP19-5  | -4.8345799 | 0.00422538 | 0.05578967 |
| OCSTAMP    | -4.7648704 | 0.00423785 | 0.05583668 |
| TRAV17     | 3.83282872 | 0.0042386  | 0.05583668 |



|            |            |            |            |
|------------|------------|------------|------------|
| TG         | -2.3183711 | 0.00423271 | 0.05583668 |
| SLC1A3     | 1.31929668 | 0.00423904 | 0.05583668 |
| GTSE1-DT   | -2.3415473 | 0.00424625 | 0.05583899 |
| FTH1P10    | 1.65045006 | 0.00424953 | 0.05583899 |
| NEK6       | 1.22877169 | 0.00425183 | 0.05583899 |
| KIAA0319   | -1.6457293 | 0.00424331 | 0.05583899 |
| CREB3L3    | -2.6369579 | 0.00425103 | 0.05583899 |
| LINC02412  | -5.0753647 | 0.00425828 | 0.05589053 |
| LHFPL4     | -2.5893145 | 0.00426603 | 0.05595906 |
| PLTP       | 1.38605144 | 0.00427509 | 0.05597833 |
| DLK1       | -3.2113604 | 0.00427434 | 0.05597833 |
| POLR2K     | 2.00213806 | 0.00427335 | 0.05597833 |
| DNAH17-AS1 | -3.1354882 | 0.00428365 | 0.05605723 |
| TBC1D3I    | -3.5536047 | 0.00428748 | 0.05607425 |
| RPL3L      | -4.0376788 | 0.00429021 | 0.05607684 |
| RNF152     | -1.2203541 | 0.00430573 | 0.05611396 |
| TUBB8B     | -3.1664315 | 0.00430241 | 0.05611396 |
| ARHGAP39   | -1.6830745 | 0.00429996 | 0.05611396 |
| PXK        | 1.82953983 | 0.00429663 | 0.05611396 |
| PICART1    | -2.5909961 | 0.00430457 | 0.05611396 |
| TPH2       | -3.8381702 | 0.00432495 | 0.05626505 |
| SH3GL1P3   | -4.5006102 | 0.00432064 | 0.05626505 |
| KCNN1      | -2.7517607 | 0.00432289 | 0.05626505 |
| SF3A3P1    | -3.0573922 | 0.00432787 | 0.05627    |
| MYO5BP1    | -4.1878717 | 0.00433996 | 0.05636161 |
| NRAS       | 1.19281983 | 0.00434001 | 0.05636161 |
| ZC3H12D    | 1.6686798  | 0.00434833 | 0.05643644 |
| DACT2      | -2.2164927 | 0.00436513 | 0.05654807 |
| SLF1       | 1.45883313 | 0.00436013 | 0.05654807 |
| LETM1P2    | -2.809109  | 0.00436715 | 0.05654807 |
| MCL1       | 1.1137711  | 0.00436435 | 0.05654807 |
| PPP2R3B    | -1.3987555 | 0.00437068 | 0.05656066 |
| CORO1A     | 1.63245302 | 0.00437941 | 0.05664057 |
| TMEM33     | 1.19083631 | 0.00439026 | 0.05664837 |
| SERPINB13  | -2.5145522 | 0.00438605 | 0.05664837 |
| PTPN1      | 1.23511718 | 0.00438901 | 0.05664837 |
| DLX1       | -2.8756166 | 0.00438884 | 0.05664837 |
| NDUFA5P9   | -4.393561  | 0.00441076 | 0.05681358 |
| PNMA8B     | -1.5490859 | 0.00440908 | 0.05681358 |
| MYT1L      | -2.2936767 | 0.00440643 | 0.05681358 |
| IGLV2-11   | 1.85394404 | 0.00441481 | 0.05683265 |
| H4C15      | -1.5637781 | 0.00441754 | 0.05683476 |

|             |            |            |            |
|-------------|------------|------------|------------|
| TRIM40      | -3.5158371 | 0.00442468 | 0.05689354 |
| LINC02895   | -2.7934509 | 0.00445891 | 0.05707085 |
| SLIT1       | -2.28305   | 0.00445062 | 0.05707085 |
| CCDC136     | -1.5197478 | 0.0044591  | 0.05707085 |
| PIGK        | 1.43165735 | 0.00445512 | 0.05707085 |
| LINC01918   | -4.7232652 | 0.0044546  | 0.05707085 |
| SELPLG      | 1.48990284 | 0.00445545 | 0.05707085 |
| LINC00184   | -2.7972951 | 0.00444854 | 0.05707085 |
| GPBAR1      | -2.8574297 | 0.00445371 | 0.05707085 |
| EPB41L5     | 1.40012367 | 0.00446899 | 0.05716437 |
| IGLV4-69    | 2.39585554 | 0.00447451 | 0.05720191 |
| ST8SIA6-AS1 | -3.9982223 | 0.00448011 | 0.05722774 |
| DSG1        | -3.8340218 | 0.00448946 | 0.05722774 |
| RNF175      | -2.4638437 | 0.00448823 | 0.05722774 |
| RPL19P14    | -3.099329  | 0.00448476 | 0.05722774 |
| LINC02026   | -2.1551679 | 0.00448465 | 0.05722774 |
| PPP3CB      | 1.43110853 | 0.00449962 | 0.05732412 |
| SLC7A11     | -1.6480885 | 0.00451101 | 0.05736975 |
| KRT18P20    | -4.0017104 | 0.00451357 | 0.05736975 |
| CBLB        | 1.23417095 | 0.00451048 | 0.05736975 |
| FOXN4       | -4.1286935 | 0.00450803 | 0.05736975 |
| KANK1P1     | -3.9807853 | 0.00452214 | 0.05741282 |
| PPP2R3C     | 1.68116003 | 0.00452209 | 0.05741282 |
| TLR8        | 1.81251386 | 0.00454417 | 0.05751383 |
| UBXN2B      | 1.76856921 | 0.0045457  | 0.05751383 |
| ABCD2       | 1.99370868 | 0.00453623 | 0.05751383 |
| CFAP53P1    | -2.7940837 | 0.00454539 | 0.05751383 |
| IGKV1-16    | 1.96878865 | 0.00454112 | 0.05751383 |
| TEX38       | -3.819546  | 0.00453748 | 0.05751383 |
| RANBP9      | 1.45188874 | 0.00455376 | 0.057583   |
| OR5AU1      | -2.2640676 | 0.00455722 | 0.05759377 |
| ZNF123P     | -4.0641308 | 0.00456755 | 0.05764312 |
| HNRNPA1P39  | -4.5521939 | 0.00456894 | 0.05764312 |
| CYP27A1     | 1.73284291 | 0.00456394 | 0.05764312 |
| MSN         | 1.23680321 | 0.00457231 | 0.05765276 |
| RPL5P26     | -3.6946496 | 0.00457747 | 0.05768497 |
| TNFAIP8     | 1.30284666 | 0.00458501 | 0.0577143  |
| CP          | 1.46842435 | 0.00458401 | 0.0577143  |
| PROM2       | -1.598072  | 0.0046009  | 0.05788136 |
| NHLH2       | -2.1978136 | 0.00462095 | 0.05806764 |
| TRAF3IP3    | 1.77739938 | 0.0046207  | 0.05806764 |
| KDM4E       | -3.7788568 | 0.00462511 | 0.05808691 |

|            |            |            |            |
|------------|------------|------------|------------|
| EHHADH-AS1 | -5.0271896 | 0.00464097 | 0.05825297 |
| SEMA6C     | -1.552342  | 0.00465771 | 0.05842991 |
| BSNDP2     | -5.0065239 | 0.00466205 | 0.05845124 |
| WIPF3      | -1.5128352 | 0.00466699 | 0.05846096 |
| LNCOC1     | -2.2557984 | 0.00466811 | 0.05846096 |
| FAM99A     | -3.9409309 | 0.00467213 | 0.05846322 |
| KIF3AP1    | -2.6866016 | 0.00467447 | 0.05846322 |
| OR1I1      | -2.8042506 | 0.00467885 | 0.05846322 |
| NABP1      | 1.26571115 | 0.00467881 | 0.05846322 |
| DND1P1     | -3.0943251 | 0.00470783 | 0.05879205 |
| LINC01554  | -2.4900743 | 0.00471171 | 0.05880734 |
| LINC01293  | -3.4905734 | 0.00471473 | 0.05881181 |
| NPAS4      | -3.0306185 | 0.0047191  | 0.05882039 |
| GABARAPL2  | 1.27211276 | 0.00472073 | 0.05882039 |
| FOXN3P1    | -4.1236851 | 0.00473734 | 0.05889915 |
| NDFIP1     | 1.43453338 | 0.0047377  | 0.05889915 |
| CELF2-AS2  | -3.8884449 | 0.00473191 | 0.05889915 |
| PLIN4      | -1.8340401 | 0.00473426 | 0.05889915 |
| GPR174     | 1.94746632 | 0.0047408  | 0.05889957 |
| LYSMD1     | -1.505281  | 0.00474305 | 0.05889957 |
| ACSL4      | 1.09459457 | 0.00474681 | 0.05890921 |
| LEPR       | 1.77655851 | 0.00474915 | 0.05890921 |
| RNF183     | -2.4026644 | 0.00475368 | 0.05893233 |
| B3GAT2     | -3.1227672 | 0.00475741 | 0.05894552 |
| PSME1      | 1.19931797 | 0.00476414 | 0.05899194 |
| MARK2P10   | -4.6748061 | 0.00476714 | 0.05899194 |
| LILRB2     | 1.53606527 | 0.00476915 | 0.05899194 |
| RNU5B-1    | 2.85288751 | 0.00477714 | 0.0590577  |
| KRT16P2    | -2.1503323 | 0.00479069 | 0.05912613 |
| RNASE7     | -4.0339664 | 0.00478741 | 0.05912613 |
| ALDH3B1    | 1.31774005 | 0.00479027 | 0.05912613 |
| MIRLET7BHG | -1.2077679 | 0.00481284 | 0.05930834 |
| PPP4R4     | -1.950472  | 0.00481349 | 0.05930834 |
| HERC5      | 1.68006522 | 0.00481302 | 0.05930834 |
| PPP6C      | 1.39869413 | 0.00482335 | 0.05933064 |
| GNPDA2     | 1.51004254 | 0.00482168 | 0.05933064 |
| OPRD1      | -2.3027829 | 0.00481925 | 0.05933064 |
| ABI3BP     | 1.95601451 | 0.00483196 | 0.05937293 |
| RPL23AP20  | -3.5566232 | 0.00483215 | 0.05937293 |
| SPATA31C1  | -2.5516352 | 0.00485199 | 0.05953433 |
| EPPK1      | -1.7082971 | 0.00485294 | 0.05953433 |
| ENPP7      | -2.8452921 | 0.00485336 | 0.05953433 |

|            |            |            |            |
|------------|------------|------------|------------|
| CCL21      | 1.72135353 | 0.00485735 | 0.05955028 |
| PAUPAR     | -3.0062557 | 0.00486697 | 0.05963517 |
| BTG1       | 1.38246901 | 0.00487271 | 0.05963954 |
| NMNAT3     | -1.3964984 | 0.00487071 | 0.05963954 |
| C8orf74    | -3.910796  | 0.00488776 | 0.05975757 |
| CSRNP3     | -1.4124184 | 0.00488508 | 0.05975757 |
| CPB1       | -2.8818026 | 0.00489439 | 0.05980564 |
| DAZAP2     | 1.24852578 | 0.00491322 | 0.05996947 |
| YBX2P2     | -2.2638126 | 0.00491303 | 0.05996947 |
| P2RY10     | 2.15414448 | 0.00493049 | 0.06008072 |
| TBX1       | -1.7448362 | 0.0049317  | 0.06008072 |
| TMED7      | 1.29300149 | 0.00493319 | 0.06008072 |
| HRAT92     | -2.1495399 | 0.00493166 | 0.06008072 |
| SERPINA13P | -4.7664607 | 0.00493678 | 0.06009137 |
| AKAP3      | -2.5854276 | 0.00495259 | 0.06012757 |
| GPR149     | -2.221628  | 0.00494272 | 0.06012757 |
| LRRC25     | 2.09542575 | 0.00494642 | 0.06012757 |
| GCGR       | -3.3436642 | 0.00495133 | 0.06012757 |
| SBNO1-AS1  | -2.285767  | 0.00495334 | 0.06012757 |
| EAF2       | 2.48122317 | 0.00495809 | 0.06015219 |
| GCAWKR     | -2.0535389 | 0.0049627  | 0.06017509 |
| PRRG2      | -2.4946417 | 0.00496909 | 0.06020912 |
| TEX45      | -3.7693999 | 0.00497095 | 0.06020912 |
| CALHM1     | -3.3650496 | 0.00499276 | 0.06044024 |
| MGAT4FP    | -3.4433014 | 0.00500226 | 0.0605221  |
| TCF21      | 1.8570906  | 0.00501437 | 0.06053627 |
| TMEM30A    | 1.21524457 | 0.00501188 | 0.06053627 |
| SP100      | 1.34091908 | 0.00500942 | 0.06053627 |
| TP53TG3D   | -3.7114491 | 0.00500868 | 0.06053627 |
| PRLHR      | -3.1175034 | 0.00502858 | 0.06067478 |
| SI         | -5.394557  | 0.00506273 | 0.06094052 |
| LINC02028  | -2.3264285 | 0.00506438 | 0.06094052 |
| ACSM2B     | -2.2101197 | 0.00506222 | 0.06094052 |
| ECE2       | -4.9812737 | 0.00506344 | 0.06094052 |
| RNU1-1     | -7.5961013 | 0.00506387 | 0.06094052 |
| CALML3-AS1 | -2.2349158 | 0.00506928 | 0.06096046 |
| FEM1C      | 1.20180099 | 0.00507154 | 0.06096046 |
| APC2       | -2.3764884 | 0.0050799  | 0.06099459 |
| ROPN1      | -3.2631946 | 0.00507956 | 0.06099459 |
| P3H4       | -1.3845988 | 0.00509353 | 0.06112512 |
| ZMAT4      | -2.6519024 | 0.00510236 | 0.06118206 |
| BST2       | 1.24436919 | 0.0051038  | 0.06118206 |

|             |            |            |            |
|-------------|------------|------------|------------|
| MARCHF10-DT | -4.1984181 | 0.00512583 | 0.06141285 |
| SASH3       | 1.76643392 | 0.00512878 | 0.06141486 |
| IGF2BP1     | -2.1855011 | 0.00513452 | 0.06145039 |
| SERPINE1    | 1.4226165  | 0.00515551 | 0.06166829 |
| LY6G6D      | -4.6922975 | 0.00516628 | 0.06176371 |
| HS3ST2      | 2.32889469 | 0.00517133 | 0.06179065 |
| KRT18P36    | -3.9791567 | 0.00518086 | 0.06183779 |
| VIPR1       | 1.30298325 | 0.00517953 | 0.06183779 |
| PABPN1P1    | -4.9073884 | 0.00518987 | 0.06191197 |
| B3GNT4      | -2.5527474 | 0.00519522 | 0.0619424  |
| NDUFB1      | 1.47163309 | 0.00519861 | 0.06194942 |
| KCNG1       | -2.1503325 | 0.00520417 | 0.06198231 |
| SP140       | 1.54300696 | 0.00521276 | 0.06205123 |
| FNDC5       | -2.8415354 | 0.00521605 | 0.06205696 |
| SLC30A10    | -3.2837593 | 0.00523425 | 0.0622401  |
| PTOV1-AS1   | -1.5008475 | 0.0052505  | 0.0623662  |
| PCDHB1      | -2.195603  | 0.00524914 | 0.0623662  |
| SCN8A       | -1.6406843 | 0.0052606  | 0.06245265 |
| RBM19       | -1.1909458 | 0.00526379 | 0.06245709 |
| CRYBG2      | -2.2743176 | 0.00528345 | 0.06265678 |
| LINC01305   | -2.8643975 | 0.00529167 | 0.06272055 |
| LINC00958   | -2.2569434 | 0.0052992  | 0.06274267 |
| GJC1        | -1.2887189 | 0.00529769 | 0.06274267 |
| FIBIN       | 1.76132671 | 0.00530341 | 0.06275896 |
| CFC1B       | -4.527258  | 0.00531202 | 0.06282717 |
| TMPRSS11F   | -2.7950434 | 0.00533837 | 0.06310513 |
| XRCC2       | -1.4765655 | 0.0053494  | 0.06320174 |
| NDE1P2      | -3.3126735 | 0.00536387 | 0.06330509 |
| PSMB2       | 1.43618672 | 0.00536257 | 0.06330509 |
| LINC00560   | -3.2749634 | 0.00538526 | 0.06335481 |
| SHROOM3     | 1.29945248 | 0.00538223 | 0.06335481 |
| NOX5        | -2.3013201 | 0.0053808  | 0.06335481 |
| SALRNA3     | -2.9774771 | 0.00538475 | 0.06335481 |
| ASPN        | 1.75021796 | 0.00537452 | 0.06335481 |
| DIAPH1      | 1.14171914 | 0.00538437 | 0.06335481 |
| DNAJB3      | -4.2255093 | 0.00539167 | 0.06339656 |
| SSU72P3     | -4.1718993 | 0.00539622 | 0.0634163  |
| TGFBR3L     | -5.3737704 | 0.0053998  | 0.06342476 |
| LOXL1-AS1   | -1.6652216 | 0.00540445 | 0.06344568 |
| GABPA       | 1.41781964 | 0.00541181 | 0.06347964 |
| SEPTIN7P7   | -3.877324  | 0.00541556 | 0.06347964 |
| ACTL8       | -4.2019173 | 0.00541595 | 0.06347964 |

|           |            |            |            |
|-----------|------------|------------|------------|
| RPL30     | 1.35856618 | 0.00542898 | 0.06356499 |
| SPN       | 1.62431659 | 0.00542705 | 0.06356499 |
| HMGB1P45  | -4.0989387 | 0.00544666 | 0.06373827 |
| PRMT5-AS1 | -2.5122653 | 0.00546434 | 0.06374854 |
| AOC3      | 1.53321277 | 0.00545771 | 0.06374854 |
| SERPINA10 | -3.5537369 | 0.0054677  | 0.06374854 |
| LSP1      | 1.61128104 | 0.00546639 | 0.06374854 |
| TRPM3     | -1.971534  | 0.00545085 | 0.06374854 |
| CLIC5     | 1.49791928 | 0.00546391 | 0.06374854 |
| MRE11P1   | -3.7153081 | 0.00545417 | 0.06374854 |
| XKR5      | -3.1431513 | 0.0054759  | 0.06375232 |
| AGGF1P1   | -2.0327218 | 0.00547667 | 0.06375232 |
| BTN3A2    | 1.31613142 | 0.00547225 | 0.06375232 |
| DLX5      | -1.6831899 | 0.00549143 | 0.06375644 |
| ESYT3     | 1.35782059 | 0.00548856 | 0.06375644 |
| EIF3E     | 1.34041624 | 0.00548284 | 0.06375644 |
| CALHM3    | -4.3273499 | 0.00548693 | 0.06375644 |
| SUSD4     | -1.4953542 | 0.00548677 | 0.06375644 |
| ATP6V1E2  | -1.4928144 | 0.00549563 | 0.06377179 |
| GATA3     | 1.87771594 | 0.00550404 | 0.06383591 |
| CDX2      | -3.5378018 | 0.00551271 | 0.06390301 |
| SLC38A3   | -3.9245577 | 0.00554337 | 0.06422478 |
| LAMB3     | -1.6318672 | 0.00554939 | 0.06426081 |
| ALLC      | -4.0986177 | 0.00557021 | 0.06446824 |
| LINC02902 | -3.3411287 | 0.00557511 | 0.06449122 |
| DMRT1     | -3.6908002 | 0.00558125 | 0.06452848 |
| C16orf82  | -3.5826942 | 0.00558604 | 0.06453121 |
| OR2L5     | -4.5397144 | 0.00558732 | 0.06453121 |
| RPL4P2    | -4.12838   | 0.00559616 | 0.06459959 |
| ABCA9-AS1 | -4.5696507 | 0.00560443 | 0.06463532 |
| RBMX2P5   | -3.3534723 | 0.0056051  | 0.06463532 |
| EXOC5     | 1.31563503 | 0.00563285 | 0.06475285 |
| FERMT1    | -1.6759454 | 0.00562406 | 0.06475285 |
| LINC01553 | -2.6746538 | 0.00562687 | 0.06475285 |
| SALL1P1   | -3.6714964 | 0.00563064 | 0.06475285 |
| VCAN      | 1.19721412 | 0.00562237 | 0.06475285 |
| PAX3      | -3.1489993 | 0.00562987 | 0.06475285 |
| DDX43P2   | -3.2927686 | 0.00564057 | 0.0647633  |
| ST13P15   | -1.8155626 | 0.00564253 | 0.0647633  |
| NEUROD6   | -3.843808  | 0.00563671 | 0.0647633  |
| ATP6V1B1  | -2.3018436 | 0.00565184 | 0.06476933 |
| OR6B1     | -2.6741275 | 0.00564727 | 0.06476933 |

|             |            |            |            |
|-------------|------------|------------|------------|
| PITX2       | -2.6730175 | 0.00565006 | 0.06476933 |
| LINC02394   | -5.0812227 | 0.00566953 | 0.06493842 |
| HTR2C       | -3.4452342 | 0.00568355 | 0.06504865 |
| CSPG4P10    | -1.4951868 | 0.00568797 | 0.06504865 |
| NEK7        | 1.76091204 | 0.0056878  | 0.06504865 |
| FAM47C      | -3.3723495 | 0.00570576 | 0.06512894 |
| RPL13P6     | -4.9533016 | 0.00570623 | 0.06512894 |
| FBN1        | 1.09698012 | 0.00570677 | 0.06512894 |
| EPS8L2      | -1.287721  | 0.00570056 | 0.06512894 |
| LINC00365   | -2.5967091 | 0.00572052 | 0.06521864 |
| PRKAR1A     | 1.19522817 | 0.00571817 | 0.06521864 |
| NEK4P2      | -4.3264947 | 0.00573367 | 0.06533312 |
| SAPCD2      | -1.7399493 | 0.00573647 | 0.06533312 |
| LINC00710   | -3.7392789 | 0.00573988 | 0.06533835 |
| SLC12A5     | -2.5701053 | 0.00575711 | 0.06545351 |
| RANP6       | -4.2128395 | 0.00576473 | 0.06545351 |
| TP1P2       | -2.4070646 | 0.00576496 | 0.06545351 |
| MZB1        | 1.69156842 | 0.00576774 | 0.06545351 |
| LOX         | 1.29675435 | 0.00576317 | 0.06545351 |
| IGKV1-33    | 4.37782907 | 0.00575601 | 0.06545351 |
| VGLL3       | 1.3879272  | 0.00577409 | 0.065492   |
| SNAP25-AS1  | -3.0683009 | 0.00577991 | 0.06552444 |
| RCSD1       | 1.46973544 | 0.00580332 | 0.06575614 |
| LPP-AS2     | -1.3708594 | 0.00580768 | 0.06577187 |
| DNAJC27-AS1 | -2.2600894 | 0.00581716 | 0.06583656 |
| FCGR2C      | 1.64058643 | 0.00581935 | 0.06583656 |
| MALT1       | 1.17983404 | 0.00583499 | 0.06584523 |
| NCOA7       | 1.29538853 | 0.00583325 | 0.06584523 |
| GSN-AS1     | -1.9113554 | 0.00582901 | 0.06584523 |
| OGDHL       | -2.7588022 | 0.00583372 | 0.06584523 |
| HOXB3       | -1.2631324 | 0.00583424 | 0.06584523 |
| COPS4       | 1.63722755 | 0.00583903 | 0.06585725 |
| LHCGR       | -2.3680826 | 0.00585373 | 0.06598938 |
| RALBP1P1    | -3.1384619 | 0.00585731 | 0.06599609 |
| TM4SF4      | -4.5182313 | 0.0058751  | 0.06616291 |
| UBE2L6      | 1.35316249 | 0.00588424 | 0.06621339 |
| COX17       | 1.54407472 | 0.00588557 | 0.06621339 |
| SERPINB6    | 1.18489284 | 0.00589705 | 0.06630883 |
| AKR1B1P1    | -4.2709582 | 0.00590044 | 0.06631332 |
| MZF1-AS1    | -1.5764788 | 0.00591626 | 0.06645102 |
| SUMO1       | 1.49140697 | 0.0059187  | 0.06645102 |
| S1PR5       | -1.6960341 | 0.00594427 | 0.06670422 |

|            |            |            |            |
|------------|------------|------------|------------|
| RPS3AP25   | -3.8401472 | 0.00596657 | 0.06692053 |
| ARPC1B     | 1.33664799 | 0.00598208 | 0.06706047 |
| NFKB1      | 1.12767169 | 0.00599157 | 0.06707853 |
| CACNA1A    | -2.0858926 | 0.00598792 | 0.06707853 |
| DOCK10     | 1.4244421  | 0.00599278 | 0.06707853 |
| GLRX       | 1.49083746 | 0.00599927 | 0.06710035 |
| SBSN       | -2.896505  | 0.0060008  | 0.06710035 |
| CDY2A      | -3.8044627 | 0.00602811 | 0.06716823 |
| SLCO3A1    | -1.3058408 | 0.00602623 | 0.06716823 |
| CRY1       | 1.36924798 | 0.00602    | 0.06716823 |
| MAP3K10    | -1.406233  | 0.00601262 | 0.06716823 |
| RPS3AP50   | -4.0862784 | 0.00601824 | 0.06716823 |
| ANKRD13C   | 1.27856804 | 0.00602316 | 0.06716823 |
| CASP4LP    | 1.59839168 | 0.00602219 | 0.06716823 |
| KRT42P     | -2.3573843 | 0.00603234 | 0.06718151 |
| TRIM16     | -1.4249701 | 0.00603748 | 0.06720498 |
| IGBP1P2    | -2.799053  | 0.00604402 | 0.06723243 |
| PRKCB      | 1.64380357 | 0.00604603 | 0.06723243 |
| ZAN        | -2.4848832 | 0.00607815 | 0.06755564 |
| HSP90AB7P  | -3.6764669 | 0.00608638 | 0.0676104  |
| RPL36AL    | 1.27654863 | 0.00609529 | 0.0676104  |
| PGLYRP2    | -3.0739567 | 0.00609397 | 0.0676104  |
| PITRM1-AS1 | -2.5055154 | 0.00609237 | 0.0676104  |
| ELL2       | 1.19324956 | 0.0061166  | 0.06781279 |
| CABP5      | -3.9790472 | 0.00613284 | 0.0679587  |
| OR2T1      | -3.7424742 | 0.00613642 | 0.06796433 |
| CHRN4      | -2.9036078 | 0.0061446  | 0.06798694 |
| SYT13      | -2.7024576 | 0.00614428 | 0.06798694 |
| AGTR2      | 4.00932823 | 0.00615811 | 0.06810237 |
| RPL29P30   | -3.1309939 | 0.00618997 | 0.06838631 |
| AHCYL2     | 1.1947602  | 0.00618917 | 0.06838631 |
| TMEM170B   | 1.30427595 | 0.00620019 | 0.06846506 |
| GPR33      | -4.3076324 | 0.00620489 | 0.06848278 |
| CSF2RB     | 1.43678314 | 0.00620861 | 0.06848971 |
| PRSS51     | -3.0173123 | 0.00621705 | 0.06850123 |
| GRAMD4P7   | -5.1991584 | 0.00622823 | 0.06850123 |
| CKMT1B     | -2.1238973 | 0.00622114 | 0.06850123 |
| ARF6       | 1.09483118 | 0.00621584 | 0.06850123 |
| RECQL      | 1.365361   | 0.00622483 | 0.06850123 |
| FCGR2B     | 1.4285143  | 0.00622524 | 0.06850123 |
| KRT18P13   | -3.6225525 | 0.00623155 | 0.06850368 |
| SCRT2      | -3.0438534 | 0.00624138 | 0.06857089 |



|           |            |            |            |
|-----------|------------|------------|------------|
| RPS12P26  | -2.2696894 | 0.00624386 | 0.06857089 |
| LY75      | 1.48821525 | 0.00625372 | 0.06864517 |
| PIP5K1P1  | -4.2777962 | 0.00625828 | 0.06866116 |
| LINC01250 | -4.2086282 | 0.00626357 | 0.06868516 |
| MKI67P1   | -3.9722142 | 0.00627035 | 0.06872534 |
| POU3F2    | -3.0281705 | 0.00628936 | 0.06885519 |
| TUBB3P1   | -3.0545245 | 0.00628587 | 0.06885519 |
| IFI6      | 1.43354524 | 0.00629153 | 0.06885519 |
| TSPAN5-DT | -1.722691  | 0.00630301 | 0.06887872 |
| OXGR1     | -2.5530203 | 0.00630152 | 0.06887872 |
| RBP4      | 4.711676   | 0.00629885 | 0.06887872 |
| MESTIT1   | -2.8325441 | 0.00631356 | 0.06895996 |
| OR2A5     | -2.4562878 | 0.00631766 | 0.06897064 |
| LINC01255 | -4.8551578 | 0.00632581 | 0.06901017 |
| POTEH-AS1 | -3.1700363 | 0.00632752 | 0.06901017 |
| DDX6P2    | -5.163193  | 0.0063351  | 0.06902117 |
| MIR155HG  | 2.75180864 | 0.00634162 | 0.06902117 |
| MAGIX     | -1.6550256 | 0.00633283 | 0.06902117 |
| MIR122HG  | -2.9806464 | 0.00634412 | 0.06902117 |
| SLC35G5   | -3.4332658 | 0.00633922 | 0.06902117 |
| MKRN9P    | -2.9422516 | 0.00635451 | 0.06910022 |
| UPRT      | 1.8656142  | 0.0063806  | 0.06931581 |
| IFITM1    | 1.31250189 | 0.00638032 | 0.06931581 |
| KRT17P2   | -4.2547988 | 0.00639582 | 0.06944708 |
| DDX43P1   | -2.8972717 | 0.00639987 | 0.06945695 |
| GPR1-AS   | -2.675083  | 0.00641922 | 0.06963284 |
| DDI1      | -3.3876348 | 0.00642938 | 0.06970889 |
| LINC02334 | -2.6656655 | 0.00645253 | 0.06972012 |
| PNCK      | -2.2836489 | 0.0064477  | 0.06972012 |
| GLIPR2    | 1.38491815 | 0.0064431  | 0.06972012 |
| DLX6      | -1.9370637 | 0.00644649 | 0.06972012 |
| LINC00927 | -3.7622246 | 0.00645146 | 0.06972012 |
| RAB15     | -1.2956337 | 0.00643981 | 0.06972012 |
| PTCHD3    | -4.0755741 | 0.00645563 | 0.06972012 |
| VWCE      | -2.0019389 | 0.00643512 | 0.06972012 |
| EIF4A1    | 1.504642   | 0.00646113 | 0.06974557 |
| OSBPL9    | 1.19042731 | 0.00647536 | 0.06986503 |
| FAM174C   | -1.604498  | 0.00648322 | 0.06991577 |
| ARMC1     | 1.33973841 | 0.00649189 | 0.06997517 |
| AIM2      | 1.57119094 | 0.00649514 | 0.06997612 |
| IGLV8-61  | 2.76170116 | 0.00651421 | 0.07001116 |
| CACNA1G   | -1.8052367 | 0.00650806 | 0.07001116 |

|             |            |            |            |
|-------------|------------|------------|------------|
| CELP        | -3.2279623 | 0.00651307 | 0.07001116 |
| GDI2P1      | -3.8994621 | 0.00650734 | 0.07001116 |
| TMEM167B-DT | -2.0368674 | 0.00651244 | 0.07001116 |
| PPP1R26-AS1 | -1.8771735 | 0.00654253 | 0.07021325 |
| TMEM14EP    | 3.1406378  | 0.0065376  | 0.07021325 |
| CHAF1A      | -1.3306276 | 0.00653966 | 0.07021325 |
| C5AR1       | 1.56103055 | 0.00655378 | 0.07026585 |
| CCPG1       | 1.07831826 | 0.0065515  | 0.07026585 |
| MTND4P26    | -3.8358002 | 0.00657262 | 0.07039957 |
| HNRNPA1P6   | -3.3315997 | 0.00657021 | 0.07039957 |
| ANKRD20A4P  | -3.0287618 | 0.00659044 | 0.07042983 |
| TNFRSF9     | 1.72627399 | 0.00657995 | 0.07042983 |
| ADGRL4      | 1.79390809 | 0.00659136 | 0.07042983 |
| SKP1        | 1.19798396 | 0.00659133 | 0.07042983 |
| LYSMD3      | 1.23841374 | 0.0065852  | 0.07042983 |
| UBL3        | 1.30732456 | 0.0066107  | 0.07056831 |
| PSMA5       | 1.23792184 | 0.00660981 | 0.07056831 |
| CARD16      | 1.586304   | 0.00661501 | 0.07058034 |
| SGTB        | 1.39383057 | 0.00663708 | 0.07078164 |
| SH3BP5      | 1.27332878 | 0.00664356 | 0.07081659 |
| PNMA6E      | -3.1621977 | 0.00665494 | 0.07090377 |
| KRT8P47     | -3.5343112 | 0.00665843 | 0.07090689 |
| ZNF831      | 1.51512653 | 0.00666889 | 0.07098408 |
| PRSS40A     | -3.0031157 | 0.00667839 | 0.07105097 |
| KREMEN2     | -2.9686145 | 0.00669304 | 0.0711385  |
| TEX19       | -3.3934076 | 0.0066923  | 0.0711385  |
| PPP1R26P2   | -2.8990432 | 0.00670225 | 0.07118587 |
| HMGB1P33    | -3.4462287 | 0.00670393 | 0.07118587 |
| SCN9A       | -1.3000045 | 0.0067434  | 0.07157063 |
| LINC00402   | 2.27769614 | 0.00675583 | 0.07166816 |
| NCF1        | 1.58941266 | 0.00676293 | 0.07169491 |
| RAB40B      | -1.3253026 | 0.00676483 | 0.07169491 |
| CHGA        | -2.3696978 | 0.00677838 | 0.07179108 |
| WDR64       | -2.1617462 | 0.00678039 | 0.07179108 |
| IFNA17      | -4.4379092 | 0.00680512 | 0.07201845 |
| MAGEA11     | -3.1491877 | 0.00682948 | 0.07206072 |
| BMS1P8      | -3.9393351 | 0.00682268 | 0.07206072 |
| MPC1        | 1.64453588 | 0.00683064 | 0.07206072 |
| SLC28A2     | -2.8575946 | 0.00682149 | 0.07206072 |
| NPY4R       | -4.5792748 | 0.00682474 | 0.07206072 |
| MXRA7P1     | -2.0195606 | 0.00682029 | 0.07206072 |
| LINC01341   | -1.5798664 | 0.00683191 | 0.07206072 |

|            |            |            |            |
|------------|------------|------------|------------|
| NAP1L1     | 1.45103605 | 0.00684606 | 0.07216066 |
| GRIK5      | -1.7478568 | 0.00684791 | 0.07216066 |
| HOXC-AS3   | -3.2692825 | 0.0068608  | 0.0722277  |
| WNT10A     | -1.8609182 | 0.00685854 | 0.0722277  |
| SPEM3      | -2.9790851 | 0.0068683  | 0.07227225 |
| IFIT5      | 1.3602225  | 0.0068856  | 0.07241988 |
| HS3ST4     | -3.4422259 | 0.00689523 | 0.07244453 |
| ANAPC15P2  | -5.1886949 | 0.00689166 | 0.07244453 |
| CELSR3     | -1.5731801 | 0.00689886 | 0.07244453 |
| KRBOX1-AS1 | -3.9287828 | 0.00690104 | 0.07244453 |
| MS4A2      | 1.67684554 | 0.00692034 | 0.0725783  |
| SNORD10    | 1.44484428 | 0.0069194  | 0.0725783  |
| SIX3       | -3.0598322 | 0.00692713 | 0.07261511 |
| NDUFB4P11  | -2.8959798 | 0.0069318  | 0.0726296  |
| LINC02709  | -2.6513367 | 0.00694745 | 0.07272476 |
| HK3        | 1.77271064 | 0.00694612 | 0.07272476 |
| IAPP       | -3.766562  | 0.00695278 | 0.07274611 |
| COL6A4P1   | -2.4751751 | 0.00696729 | 0.07282906 |
| COL4A6     | -1.6072449 | 0.00696594 | 0.07282906 |
| ATG9B      | -1.6449708 | 0.00698472 | 0.07297679 |
| KCNQ1OT1   | -1.1083029 | 0.00699898 | 0.07309128 |
| ARHGEF39   | -1.840778  | 0.00700523 | 0.07312207 |
| DNAJA1P1   | -3.0443976 | 0.00704045 | 0.07334238 |
| CTAGE12P   | -3.1693524 | 0.00703267 | 0.07334238 |
| VEGFA      | -1.4463353 | 0.00704291 | 0.07334238 |
| GJA5       | 1.36424267 | 0.00703363 | 0.07334238 |
| HSPB9      | -2.9476085 | 0.00704055 | 0.07334238 |
| SNX18P8    | -3.4248778 | 0.00704885 | 0.07335093 |
| LHFPL3-AS2 | 1.81850242 | 0.00705036 | 0.07335093 |
| ASTN1      | -2.3180617 | 0.00705457 | 0.07336025 |
| TGM1       | -2.1104453 | 0.00706467 | 0.07336187 |
| TMPRSS11A  | -3.0061916 | 0.00706054 | 0.07336187 |
| SCGB3A1    | 1.79643679 | 0.00706219 | 0.07336187 |
| PROX1-AS1  | -2.3701664 | 0.00707232 | 0.07339548 |
| MYO15A     | -1.7112592 | 0.00707454 | 0.07339548 |
| ITGAL      | 1.77904356 | 0.00707806 | 0.07339759 |
| C16orf74   | -1.8479094 | 0.00708759 | 0.07346195 |
| ELF2P3     | -4.1713615 | 0.00709446 | 0.07349879 |
| PUS1       | -1.2849717 | 0.00711232 | 0.07364932 |
| HOMER2P2   | -3.3837576 | 0.00712169 | 0.07371183 |
| ACTG1P13   | -4.5352475 | 0.00713333 | 0.07379778 |
| BAGE2      | -2.8850165 | 0.00715212 | 0.07388854 |

|           |            |            |            |
|-----------|------------|------------|------------|
| TMPRSS2   | 1.30752876 | 0.00714741 | 0.07388854 |
| MGC15885  | -3.5469372 | 0.00714911 | 0.07388854 |
| OR4K13    | -2.8651691 | 0.00716587 | 0.0739961  |
| CCDC74B   | -1.5874254 | 0.00717739 | 0.07408043 |
| TRPM2     | 1.42481416 | 0.00719074 | 0.07418362 |
| RBM17P3   | -2.9197155 | 0.00719788 | 0.07419376 |
| TIGD3     | -2.8755685 | 0.00719843 | 0.07419376 |
| FAM47B    | -4.638288  | 0.00720967 | 0.07424053 |
| SETP7     | -4.0918405 | 0.00720794 | 0.07424053 |
| RPS3AP34  | -1.971971  | 0.00722054 | 0.07427372 |
| BASP1     | 1.30095795 | 0.00722297 | 0.07427372 |
| ZNF692    | -1.2387422 | 0.00722187 | 0.07427372 |
| RECQL4    | -1.5560288 | 0.00724095 | 0.07442409 |
| SLCO1A2   | -2.058776  | 0.00724934 | 0.07447573 |
| NELL1     | -2.2128404 | 0.00726578 | 0.07455216 |
| IGHV3-53  | 2.00299073 | 0.00726728 | 0.07455216 |
| RAB5A     | 1.20947895 | 0.00726294 | 0.07455216 |
| ATP8A1    | 1.37934127 | 0.00727363 | 0.07455216 |
| SRRM5     | -1.8066871 | 0.0072725  | 0.07455216 |
| CD38      | 1.68408676 | 0.00729384 | 0.0746972  |
| CYP4V2    | 1.22965415 | 0.00729453 | 0.0746972  |
| PLN       | 1.66526135 | 0.00730766 | 0.07479699 |
| KIF2A     | 1.12242022 | 0.00732229 | 0.07491212 |
| HOXB-AS2  | -4.1206121 | 0.00733588 | 0.0750165  |
| CYYR1     | 1.74190269 | 0.00734898 | 0.0750288  |
| SH3GLB1   | 1.28910498 | 0.00734658 | 0.0750288  |
| TIGD5     | -1.5739155 | 0.00735065 | 0.0750288  |
| GTF2B     | 1.37393969 | 0.007346   | 0.0750288  |
| LINC01108 | -2.9724102 | 0.0074043  | 0.07533318 |
| LINC01630 | -2.493636  | 0.00740392 | 0.07533318 |
| MAS1      | -2.4686085 | 0.007399   | 0.07533318 |
| SLC6A2    | -3.5231439 | 0.00739907 | 0.07533318 |
| IGKV3-20  | 3.9766807  | 0.00738581 | 0.07533318 |
| ACTN2     | -2.1082728 | 0.0073875  | 0.07533318 |
| CD55      | 1.31224692 | 0.00739687 | 0.07533318 |
| PTGS2     | 1.70366395 | 0.00742013 | 0.0754596  |
| PGR-AS1   | -4.3852393 | 0.00742949 | 0.07548536 |
| FAM166A   | -3.4889906 | 0.00742908 | 0.07548536 |
| TMEM79    | -1.692435  | 0.00743357 | 0.07549222 |
| TCAM1P    | -2.6806578 | 0.00746073 | 0.07572284 |
| RPL22     | 1.24024175 | 0.00746313 | 0.07572284 |
| BASP1-AS1 | -2.3050768 | 0.00747541 | 0.07581275 |

|            |            |            |            |
|------------|------------|------------|------------|
| OSBPL8     | 1.08190048 | 0.00749255 | 0.07595171 |
| CST9       | -3.8853705 | 0.0074964  | 0.07595598 |
| TAF1L      | -2.1530276 | 0.00750101 | 0.07596786 |
| LMNTD2-AS1 | -1.5368432 | 0.0075137  | 0.07606163 |
| KLHL33     | -1.8042738 | 0.0075296  | 0.07609519 |
| PPFIA1P1   | -3.8470462 | 0.0075283  | 0.07609519 |
| HMGB3P6    | -3.0935357 | 0.00753287 | 0.07609519 |
| LPCAT2BP   | -3.9484679 | 0.00752365 | 0.07609519 |
| PDE11A     | -2.0078569 | 0.00753421 | 0.07609519 |
| IZUMO1     | -2.3951533 | 0.0075396  | 0.07611487 |
| GPR158     | -2.66719   | 0.00755171 | 0.0762024  |
| ALDH2      | 1.22161177 | 0.00755992 | 0.07625046 |
| LINC02193  | -1.7939124 | 0.00756405 | 0.07625736 |
| PACSIN3    | -1.5305687 | 0.00758258 | 0.07640939 |
| TMEM71     | 2.13088633 | 0.00759345 | 0.07646843 |
| CASP1      | 1.46715751 | 0.00759535 | 0.07646843 |
| TMCO1-AS1  | -2.0482798 | 0.00760027 | 0.07648316 |
| MED28P3    | -5.1541996 | 0.00761027 | 0.07651417 |
| TIMP2      | 1.12414659 | 0.00761027 | 0.07651417 |
| JDP2       | 1.16513052 | 0.0076196  | 0.07653841 |
| RIC3-DT    | -3.6804055 | 0.00761647 | 0.07653841 |
| GEMIN8P4   | -2.5292933 | 0.00763    | 0.07660807 |
| CCNB1IP1   | -1.3529173 | 0.00765522 | 0.07672391 |
| STRC       | -1.6568477 | 0.00765387 | 0.07672391 |
| ANTXR2     | 1.17350188 | 0.00765887 | 0.07672391 |
| SHCBP1L    | -3.7390439 | 0.00764865 | 0.07672391 |
| CTSK       | 1.16648573 | 0.00765772 | 0.07672391 |
| ADRB3      | -3.4110346 | 0.00766598 | 0.07676042 |
| VPS33B-DT  | -3.334848  | 0.00766976 | 0.07676117 |
| IFNG       | 2.95923698 | 0.007673   | 0.07676117 |
| MINDY3     | 1.55556318 | 0.00769393 | 0.07693584 |
| NUTM2A     | -2.1095705 | 0.00770672 | 0.0770289  |
| SFRP1      | -1.4901787 | 0.00772505 | 0.07712011 |
| ARRB1      | 1.38073277 | 0.00772733 | 0.07712011 |
| SLAMF7     | 1.64781253 | 0.0077284  | 0.07712011 |
| STYXL2     | -2.0821792 | 0.00773323 | 0.07712011 |
| SLC2A1     | -1.4583621 | 0.00773327 | 0.07712011 |
| ITPKA      | -2.6025164 | 0.00774509 | 0.07720323 |
| DPT        | 1.27888146 | 0.00777882 | 0.07750454 |
| KCTD9      | 1.24436963 | 0.00778965 | 0.07757748 |
| HOTAIR     | -3.4667265 | 0.00779793 | 0.07760466 |
| FCGR2A     | 1.24199271 | 0.00779939 | 0.07760466 |

|            |            |            |            |
|------------|------------|------------|------------|
| SPARCL1    | 1.4658052  | 0.00781314 | 0.07767156 |
| RTCA-AS1   | 2.62830311 | 0.00781313 | 0.07767156 |
| MAN1B1-DT  | -2.0609897 | 0.00782057 | 0.07767562 |
| TAGLN      | 1.31377478 | 0.00781977 | 0.07767562 |
| RAB6C-AS1  | -3.5500391 | 0.00782941 | 0.07769371 |
| IGKV2-24   | 2.35189211 | 0.00782603 | 0.07769371 |
| VSIG10     | -1.2925424 | 0.00783505 | 0.07771482 |
| MOB4       | 1.19702901 | 0.00784474 | 0.07777612 |
| ADGRF5P2   | -3.6198558 | 0.00785616 | 0.07785446 |
| PRRT4      | -3.8760641 | 0.00786569 | 0.07791401 |
| MED15P5    | -4.7767723 | 0.00787055 | 0.07792727 |
| PKDREJ     | -2.2218727 | 0.00788616 | 0.07801198 |
| FAM78A     | 1.38467174 | 0.00788554 | 0.07801198 |
| DUX4L52    | -3.5758489 | 0.00789501 | 0.07802978 |
| NFE2L1-DT  | -1.6737529 | 0.00789397 | 0.07802978 |
| IKZF3      | 1.58719394 | 0.00790375 | 0.07808133 |
| SLC9A3-AS1 | -1.3833849 | 0.00791275 | 0.07813533 |
| KLHL6      | 1.40553141 | 0.0079188  | 0.07816017 |
| LINC01016  | -1.9864269 | 0.00792595 | 0.07819583 |
| HCG9       | -3.5482232 | 0.00793127 | 0.07821344 |
| HAS3       | -1.3369231 | 0.00794201 | 0.0782845  |
| SENP7      | 1.50142699 | 0.00794746 | 0.07830337 |
| LINC01998  | -3.6515981 | 0.00797077 | 0.07849807 |
| GTF3C6     | 1.28412034 | 0.0080005  | 0.07875578 |
| ZEB1-AS1   | -1.4135601 | 0.0080078  | 0.0787926  |
| IGHV4-61   | 2.39645757 | 0.00801231 | 0.07880199 |
| LONP1      | -1.2512584 | 0.00802615 | 0.07890299 |
| POLR3GP2   | -3.4139711 | 0.00804006 | 0.07896955 |
| TIMP1      | 1.49055929 | 0.008038   | 0.07896955 |
| NCF1B      | 1.76616718 | 0.00806063 | 0.07913646 |
| LAPTM4A    | 1.27122823 | 0.0080681  | 0.07913961 |
| HSPA5P1    | -4.5419767 | 0.00806516 | 0.07913961 |
| RPS13      | 1.41272447 | 0.00807528 | 0.07917495 |
| CA5B       | 1.61146888 | 0.0080804  | 0.07919005 |
| SYT16      | -2.0852689 | 0.00808617 | 0.07921154 |
| ETS1-AS1   | -3.8252198 | 0.00809749 | 0.07928734 |
| RIMS4      | -2.1686368 | 0.00812203 | 0.07946505 |
| LILRA6     | 1.75087286 | 0.00812282 | 0.07946505 |
| KRT18P1    | -3.2773441 | 0.00813772 | 0.07957556 |
| PIKFYVE    | 1.26937843 | 0.00814517 | 0.07959742 |
| HS2ST1     | 1.1544883  | 0.00814714 | 0.07959742 |
| IL10RA     | 1.64135255 | 0.0081645  | 0.07969666 |

|            |            |            |            |
|------------|------------|------------|------------|
| IQCJ       | -2.7111522 | 0.00816415 | 0.07969666 |
| PARP1P1    | -3.3349725 | 0.00817108 | 0.07972571 |
| NEURL1     | -2.4603117 | 0.00817848 | 0.07976271 |
| GP1BB      | -2.5670324 | 0.00820407 | 0.07994181 |
| PPM1L-DT   | -1.9686799 | 0.00820206 | 0.07994181 |
| LIMCH1     | 1.28263418 | 0.00823581 | 0.08018051 |
| USP33      | 1.127047   | 0.00823367 | 0.08018051 |
| SCEL       | 1.31113563 | 0.00826941 | 0.08040148 |
| RHBDL3     | -2.1608091 | 0.00826397 | 0.08040148 |
| SPCS2      | 1.47918187 | 0.00826759 | 0.08040148 |
| OXA1L-DT   | -2.7086595 | 0.00828339 | 0.08040198 |
| CST1       | -2.2854286 | 0.00828763 | 0.08040198 |
| MKRN7P     | -2.7619741 | 0.00827792 | 0.08040198 |
| IGHV3-72   | 4.23853614 | 0.00828501 | 0.08040198 |
| GTF2IP13   | -1.2689925 | 0.00827562 | 0.08040198 |
| FOXS1      | -3.065124  | 0.00831005 | 0.08058416 |
| NOVA1      | -1.7229683 | 0.00832941 | 0.08070308 |
| SYT14P1    | -3.9839331 | 0.00832961 | 0.08070308 |
| CSNK1G3    | 1.11370148 | 0.00835705 | 0.08093356 |
| OR1M1      | -4.0569664 | 0.00836112 | 0.08093758 |
| LINC01602  | -4.1966557 | 0.00836503 | 0.08094    |
| ADIPOQ-AS1 | -2.8037931 | 0.0083794  | 0.08100818 |
| TTC1       | 1.24567266 | 0.00837723 | 0.08100818 |
| CICP18     | -1.46691   | 0.00839208 | 0.08109532 |
| DBIL5P     | -1.6318851 | 0.00841746 | 0.08130507 |
| NMNAT1P4   | -3.8154526 | 0.00843139 | 0.08135919 |
| FER1L5     | -1.7489106 | 0.00842749 | 0.08135919 |
| LCK        | 1.76545645 | 0.00843409 | 0.08135919 |
| BARX1-DT   | -3.468806  | 0.00845087 | 0.08137915 |
| FAM223B    | -5.481795  | 0.00844695 | 0.08137915 |
| RAB32      | 1.83097636 | 0.00844392 | 0.08137915 |
| CLEC17A    | 4.57113274 | 0.00844766 | 0.08137915 |
| KIF7       | -1.5967861 | 0.00845798 | 0.08141216 |
| DNASE1     | -1.1906404 | 0.00848415 | 0.08162856 |
| BEND7      | -1.2470113 | 0.00850228 | 0.08176745 |
| RPS10P16   | -4.5124818 | 0.00852049 | 0.08190703 |
| THRAP3P3   | -1.9882063 | 0.00852855 | 0.08194469 |
| PAQR5-DT   | -1.8771048 | 0.00853552 | 0.08194469 |
| CCT7P1     | -4.7523266 | 0.00853543 | 0.08194469 |
| HMGB3P31   | -3.2929735 | 0.00856402 | 0.08207212 |
| TCN2       | 1.44956468 | 0.00857185 | 0.08207212 |
| NOS3       | -1.4054704 | 0.00856365 | 0.08207212 |

|           |            |            |            |
|-----------|------------|------------|------------|
| TP73      | -1.684932  | 0.00856273 | 0.08207212 |
| NKAIN1    | -2.9314625 | 0.00857284 | 0.08207212 |
| PLA2G4B   | -1.7040081 | 0.00857475 | 0.08207212 |
| EFHD1     | 2.25572955 | 0.00856473 | 0.08207212 |
| HMGB1P24  | -1.8627788 | 0.00858006 | 0.08208737 |
| MYH7B     | -1.761451  | 0.00859007 | 0.08211301 |
| ZNF652P1  | -2.849096  | 0.00859016 | 0.08211301 |
| CNIH1     | 1.62585669 | 0.00859424 | 0.08211652 |
| HSFX1     | -3.6703053 | 0.00860029 | 0.08213891 |
| SYNGR1    | -1.2913387 | 0.00860534 | 0.08214572 |
| LINC-PINT | 1.14639205 | 0.00860843 | 0.08214572 |
| LINC01297 | -3.1497112 | 0.00861997 | 0.08222039 |
| ZBTB7C    | -1.4544063 | 0.00864436 | 0.08234658 |
| TMX1      | 1.28714783 | 0.00863873 | 0.08234658 |
| ACTG1P9   | -3.382464  | 0.00864232 | 0.08234658 |
| TENT5C    | 1.56545084 | 0.00865688 | 0.08243037 |
| TOPORSLP  | -2.8990459 | 0.00867618 | 0.08244689 |
| CUL4AP1   | -3.6795489 | 0.00866236 | 0.08244689 |
| PGAM1P8   | -2.0308723 | 0.00867331 | 0.08244689 |
| RBMS3-AS2 | -4.2703889 | 0.00867725 | 0.08244689 |
| COL1A2    | 1.1912906  | 0.00867351 | 0.08244689 |
| SLC8A1    | 1.32459611 | 0.00868179 | 0.08245466 |
| CHKA      | 1.22704434 | 0.00870472 | 0.08254541 |
| PDLIM3    | 1.24320887 | 0.00870527 | 0.08254541 |
| RCAN3     | 1.08324225 | 0.00870627 | 0.08254541 |
| ITGA9-AS1 | -1.5572764 | 0.00869999 | 0.08254541 |
| FCMR      | 1.75974351 | 0.00871003 | 0.08254575 |
| COP1P1    | -3.3801221 | 0.0087309  | 0.08256666 |
| RN7SL413P | -3.6406008 | 0.00873036 | 0.08256666 |
| MAGED4    | -1.9012164 | 0.00872142 | 0.08256666 |
| OR4K17    | -2.9449474 | 0.00872357 | 0.08256666 |
| COL5A2    | 1.16761695 | 0.00871821 | 0.08256666 |
| IGF2BP3   | -1.7830278 | 0.00875194 | 0.08273028 |
| PHC2      | 1.09878406 | 0.00877125 | 0.08287745 |
| TP53AIP1  | -3.0670247 | 0.00878637 | 0.08298488 |
| RPS27L    | 1.18534399 | 0.00881299 | 0.08320082 |
| HOXA-AS3  | -1.9615074 | 0.00882392 | 0.08326844 |
| DNAJC5B   | 1.92092787 | 0.00883157 | 0.08330515 |
| AKR1C8P   | -2.5297308 | 0.00885131 | 0.08345576 |
| MEOX2     | 1.6914277  | 0.00888127 | 0.08347334 |
| GDF3      | -3.768927  | 0.00886785 | 0.08347334 |
| LEPROTL1  | 1.1188178  | 0.00886555 | 0.08347334 |



|                        |            |            |            |
|------------------------|------------|------------|------------|
| NPM1P23                | -3.3805672 | 0.00887881 | 0.08347334 |
| CALM3                  | 1.10499685 | 0.00888335 | 0.08347334 |
| CEP57L1P1              | -4.0906758 | 0.00887515 | 0.08347334 |
| RNASEK-C17orf49        | -2.7565248 | 0.00888234 | 0.08347334 |
| MGAT5B                 | -2.3337448 | 0.00887091 | 0.08347334 |
| FAM238C                | -1.7311636 | 0.0088959  | 0.0835492  |
| DOCK3                  | -1.4330191 | 0.00889898 | 0.0835492  |
| PHOX2A                 | -3.1378064 | 0.00890857 | 0.08360377 |
| SPTLC2                 | 1.13854874 | 0.00891796 | 0.0836564  |
| SPON1                  | 1.49264432 | 0.00893038 | 0.08366657 |
| AMN                    | -2.2067802 | 0.00892642 | 0.08366657 |
| OR51M1                 | -3.8596209 | 0.00892868 | 0.08366657 |
| HOMEZ                  | -1.2196947 | 0.00893464 | 0.08367103 |
| IGF1                   | 1.42855692 | 0.00894893 | 0.08368807 |
| GAD1                   | -2.1518402 | 0.0089504  | 0.08368807 |
| ABCB6                  | -1.4740322 | 0.00895159 | 0.08368807 |
| ARPC5                  | 1.13533361 | 0.00894087 | 0.08368807 |
| C18orf32               | 1.26600746 | 0.00897801 | 0.08389965 |
| JAK2                   | 1.33788903 | 0.00899104 | 0.08398592 |
| LINC01934              | 1.71514143 | 0.0089972  | 0.08400799 |
| LILRB5                 | 1.59107893 | 0.0090285  | 0.08426474 |
| FBN2                   | -1.1430517 | 0.00904515 | 0.08434898 |
| PLEKHG5                | -1.1584413 | 0.00904181 | 0.08434898 |
| OFD1P17                | -2.6591001 | 0.00906687 | 0.08451593 |
| PLXDC2                 | 1.36715292 | 0.00909225 | 0.08468119 |
| ELOAP1                 | -4.0786791 | 0.0090897  | 0.08468119 |
| H2AL3                  | -4.8146402 | 0.00910118 | 0.08472868 |
| CADPS2                 | 1.16326099 | 0.0091183  | 0.08485234 |
| CADM1                  | 1.33275445 | 0.00913053 | 0.08493039 |
| RIMBP3                 | -1.6690833 | 0.00913894 | 0.08497296 |
| CRH                    | -2.7144836 | 0.00914675 | 0.08500982 |
| DTX2P1-UPK3BP1-PMS2P11 | -1.1469642 | 0.00916089 | 0.08506983 |
| HNRNPA1P16             | -1.6675385 | 0.0091605  | 0.08506983 |
| POMP                   | 1.52978797 | 0.00916487 | 0.08507105 |
| CTAGE16P               | -3.4808758 | 0.00918335 | 0.08515241 |
| RPL9                   | 1.33828736 | 0.00918637 | 0.08515241 |
| SSH2                   | 1.06626938 | 0.00918656 | 0.08515241 |
| DYNLL2-DT              | -2.23153   | 0.00918903 | 0.08515241 |
| SNX19P2                | -3.3831236 | 0.00922331 | 0.08533494 |
| DBF4P1                 | -4.1370434 | 0.00922707 | 0.08533494 |
| SOX21-AS1              | -1.9476479 | 0.009228   | 0.08533494 |
| GASAL1                 | -1.844026  | 0.00922279 | 0.08533494 |

|            |            |            |            |
|------------|------------|------------|------------|
| FAM83A-AS1 | -4.2975795 | 0.00922144 | 0.08533494 |
| IGHV3-48   | 1.84204679 | 0.00924123 | 0.0853859  |
| CICP14     | -3.1783845 | 0.00924057 | 0.0853859  |
| HS6ST3     | -2.2633868 | 0.00925102 | 0.08540497 |
| HMGB1P25   | -3.8686608 | 0.00924807 | 0.08540497 |
| PNMA6F     | -4.4666095 | 0.0092596  | 0.085413   |
| TSKS       | -2.7414828 | 0.00925857 | 0.085413   |
| UBTFL7     | -4.7770235 | 0.00928804 | 0.08563959 |
| PCAT5      | -3.3786832 | 0.00930786 | 0.08575393 |
| DAPP1      | 1.45561893 | 0.00931207 | 0.08575393 |
| XIAPP2     | -3.506423  | 0.00931043 | 0.08575393 |
| TMEM239    | -2.7169984 | 0.00933003 | 0.08578763 |
| GSG1L      | -2.4928425 | 0.00933123 | 0.08578763 |
| NKD2       | -1.4346928 | 0.00932636 | 0.08578763 |
| RPL22P12   | -4.1406095 | 0.00932342 | 0.08578763 |
| GXYLT2     | 1.49158288 | 0.00933881 | 0.08582164 |
| CCDC168    | -2.0248019 | 0.00935913 | 0.08597265 |
| WASHC4     | 1.02099777 | 0.00937371 | 0.0860118  |
| IL33       | 1.76971803 | 0.00936978 | 0.0860118  |
| GPD1L      | 1.1606306  | 0.00937505 | 0.0860118  |
| CCL4L2     | 1.9501543  | 0.00938326 | 0.08605144 |
| LINC01287  | -3.1590118 | 0.00940899 | 0.0860734  |
| FOXD4L1    | -3.8935726 | 0.00940218 | 0.0860734  |
| KRT82      | -3.2344305 | 0.00940034 | 0.0860734  |
| NR4A1      | 1.37352194 | 0.00940101 | 0.0860734  |
| PPP1R16A   | -1.4554458 | 0.00940669 | 0.0860734  |
| IL32       | 1.33954643 | 0.00939772 | 0.0860734  |
| PP7080     | -1.9217948 | 0.00942116 | 0.0861491  |
| TPD52L3    | -2.6453891 | 0.00945802 | 0.08645049 |
| ARHGEF38   | 1.28510956 | 0.0094723  | 0.08650948 |
| MNX1       | -2.6330292 | 0.00946929 | 0.08650948 |
| NFE2L3P1   | -3.0933671 | 0.00948189 | 0.08656137 |
| DDX53      | -3.364763  | 0.0094937  | 0.08663344 |
| USP6       | -1.9850053 | 0.00950654 | 0.08664344 |
| OLFM1      | -1.9111145 | 0.00949997 | 0.08664344 |
| SIX3-AS1   | -4.3410489 | 0.00950405 | 0.08664344 |
| NLRC3      | 1.64772974 | 0.00951716 | 0.08670453 |
| C2orf78    | -2.5633632 | 0.00953258 | 0.08680921 |
| HMGB1P37   | -3.4189395 | 0.00953731 | 0.08681655 |
| PES1P2     | -2.4306929 | 0.00955768 | 0.08693052 |
| LINC02857  | -2.9008139 | 0.00955399 | 0.08693052 |
| TNNT1      | -2.4812642 | 0.00956563 | 0.08696702 |

|             |            |            |            |
|-------------|------------|------------|------------|
| BCDIN3D-AS1 | -2.1053589 | 0.00958362 | 0.08709483 |
| KRT18P67    | -4.2506383 | 0.00959233 | 0.08713818 |
| IL6R-AS1    | -2.6114538 | 0.00962806 | 0.08742692 |
| VWA5B2      | -2.4568513 | 0.00963227 | 0.0874292  |
| ATP13A4-AS1 | -4.2050168 | 0.00966172 | 0.08760262 |
| ISCU        | 1.16827998 | 0.00965782 | 0.08760262 |
| SLC16A13    | -1.606516  | 0.00966325 | 0.08760262 |
| EFS         | -1.4475474 | 0.00968527 | 0.08773039 |
| GNAI2       | 1.14216741 | 0.00968141 | 0.08773039 |
| RTRAF       | 1.457      | 0.00972207 | 0.08774053 |
| FNBP1       | 1.13653764 | 0.00970621 | 0.08774053 |
| SNORA24     | 2.98071751 | 0.00971259 | 0.08774053 |
| UBE2N       | 1.28345759 | 0.00970118 | 0.08774053 |
| EOMES       | 1.91473333 | 0.00972132 | 0.08774053 |
| HSPE1P18    | 4.35525935 | 0.009695   | 0.08774053 |
| ZNF285B     | -3.5077541 | 0.00969269 | 0.08774053 |
| APBA2       | -1.179546  | 0.00971851 | 0.08774053 |
| ZNF296      | -2.0571573 | 0.00971368 | 0.08774053 |
| ANXA6       | 1.28253856 | 0.00973035 | 0.08777845 |
| RGMA        | -1.6497418 | 0.00973775 | 0.08777845 |
| BCLAF1P1    | -2.5313747 | 0.00974214 | 0.08777845 |
| SP110       | 1.35686155 | 0.0097385  | 0.08777845 |
| OR2T5       | -8.7352904 | 0.00975013 | 0.08781463 |
| HNRNPA1P69  | -3.7749195 | 0.00976224 | 0.08788794 |
| NKX2-3      | -3.8563298 | 0.00977351 | 0.08794044 |
| ZNF436-AS1  | -1.606138  | 0.00977602 | 0.08794044 |
| ENTPD6      | -1.1616317 | 0.00980912 | 0.08819174 |
| TMEM140     | 1.50930117 | 0.00981192 | 0.08819174 |
| LINC00336   | -3.0842759 | 0.00982274 | 0.08825315 |
| CIITA       | 1.40546257 | 0.00982834 | 0.0882676  |
| OMD         | 1.90994075 | 0.00985689 | 0.08848181 |
| YBX1P9      | -3.334641  | 0.00986019 | 0.08848181 |
| GPR78       | -2.0588279 | 0.00987656 | 0.08857033 |
| IGHV1-46    | 2.59973646 | 0.00987806 | 0.08857033 |
| BUB1B       | -1.4141808 | 0.00989622 | 0.08866128 |
| CALM1       | 1.2928327  | 0.00989409 | 0.08866128 |
| GJD2        | -3.562622  | 0.00990854 | 0.08873577 |
| C6orf223    | -2.1032429 | 0.00993833 | 0.08896656 |
| MCTP1       | 1.16507834 | 0.00994806 | 0.08901766 |
| PPP1R16B    | 1.41895837 | 0.00995337 | 0.0890292  |
| EBAG9       | 1.31740416 | 0.00995805 | 0.08903505 |
| KRT18P23    | -3.3699624 | 0.00996779 | 0.08906998 |

|            |            |            |            |
|------------|------------|------------|------------|
| SCN5A      | -2.1849836 | 0.00997001 | 0.08906998 |
| FOXD2      | -2.4567592 | 0.00997622 | 0.08908947 |
| ZNF826P    | 1.71439473 | 0.00999173 | 0.08919197 |
| FAM217A    | -4.0236793 | 0.00999599 | 0.08919408 |
| CTBS       | 1.27154403 | 0.01000059 | 0.08919911 |
| SETP1      | -2.9322827 | 0.01000841 | 0.08922725 |
| KLC2       | -1.2949542 | 0.01001584 | 0.08922725 |
| ZNF540     | 2.27787123 | 0.01001436 | 0.08922725 |
| EDEM1      | 1.12470871 | 0.01005541 | 0.08954374 |
| PABPC1P2   | -4.1346609 | 0.01006665 | 0.0896078  |
| SLAIN1     | 1.71986908 | 0.01007671 | 0.08966124 |
| SEPTIN7    | 1.21620691 | 0.01008104 | 0.08966376 |
| FGFR1OP2P1 | -4.1142088 | 0.01008625 | 0.08967406 |
| IL2RB      | 1.44082186 | 0.0101076  | 0.08968552 |
| LBH        | 1.12761679 | 0.01010781 | 0.08968552 |
| EEF1DP1    | -3.0859654 | 0.01009658 | 0.08968552 |
| TNK2-AS1   | -2.1659447 | 0.01010673 | 0.08968552 |
| RPSA       | 1.19007098 | 0.01009317 | 0.08968552 |
| FGD5P1     | -2.2588789 | 0.0101159  | 0.08972135 |
| COMMD8     | 1.90059803 | 0.01013528 | 0.08982666 |
| AZI2       | 1.41854524 | 0.01013589 | 0.08982666 |
| TMEM65     | 1.24812399 | 0.01014869 | 0.08990404 |
| TATDN2P1   | -3.5263259 | 0.01016119 | 0.0899788  |
| TNKS2      | 1.07202896 | 0.01016741 | 0.08999783 |
| CDH2       | 1.86917251 | 0.01017732 | 0.09004959 |
| SNRPD1     | 1.18636652 | 0.01020532 | 0.09014201 |
| MAMDC2     | 1.87734913 | 0.01020814 | 0.09014201 |
| DNM1P34    | -4.2118127 | 0.01020062 | 0.09014201 |
| STXBPL5L   | -1.9433185 | 0.01019957 | 0.09014201 |
| MUC19      | -2.3222503 | 0.01019285 | 0.09014201 |
| PRM2       | -4.0418153 | 0.01022365 | 0.09017109 |
| TAS2R40    | -4.8838186 | 0.01021693 | 0.09017109 |
| CD300A     | 1.32121009 | 0.01022053 | 0.09017109 |
| HOXC12     | -3.0250006 | 0.0102354  | 0.09020949 |
| OLFML2B    | 1.24804406 | 0.01023616 | 0.09020949 |
| SETP20     | -2.342605  | 0.01024774 | 0.0902756  |
| CLDN19     | -3.1873593 | 0.01025341 | 0.0902896  |
| LGALS9     | 1.26240104 | 0.010301   | 0.09047379 |
| RAP2A      | 1.17911317 | 0.01030284 | 0.09047379 |
| CZIB-DT    | -2.1700998 | 0.01030295 | 0.09047379 |
| OLFML3     | 1.3010265  | 0.01029798 | 0.09047379 |
| OR51F2     | -4.7917281 | 0.01028877 | 0.09047379 |

|            |            |            |            |
|------------|------------|------------|------------|
| CICP26     | -3.6439707 | 0.01028655 | 0.09047379 |
| PIMREGP1   | -4.080874  | 0.01030257 | 0.09047379 |
| IDI1P3     | -3.9568587 | 0.0103164  | 0.09052202 |
| HOXB9      | -2.7367688 | 0.0103248  | 0.09052202 |
| DNAJA1P4   | -4.6682513 | 0.01032276 | 0.09052202 |
| FKBP14-AS1 | -2.6709288 | 0.01032397 | 0.09052202 |
| CCDC74A    | -1.7808647 | 0.01033087 | 0.09053938 |
| IGHV2-5    | 2.2811153  | 0.01033845 | 0.09056991 |
| LINC00643  | -2.7494062 | 0.01035212 | 0.09061787 |
| TBCA       | 1.35932138 | 0.01035117 | 0.09061787 |
| TMBIM6     | 1.06159835 | 0.0103867  | 0.09088466 |
| SLC6A10P   | -3.3066759 | 0.01039251 | 0.09088716 |
| ADGRA1-AS1 | -3.625674  | 0.0103952  | 0.09088716 |
| EPOP       | -1.6805021 | 0.01040339 | 0.09092282 |
| HERC4      | 1.07102424 | 0.01041244 | 0.09096596 |
| RPL4P5     | -2.5411354 | 0.01041788 | 0.09097762 |
| SERINC4    | -2.5697876 | 0.01045651 | 0.09127897 |
| OR4F17     | -2.323296  | 0.01047187 | 0.09137696 |
| FAM186A    | -2.0543662 | 0.01048505 | 0.0914559  |
| ELMOD3     | -1.0936259 | 0.01052779 | 0.09179255 |
| OR4Q3      | -2.4548022 | 0.01056924 | 0.09208683 |
| CTXN3      | -3.4262442 | 0.01056986 | 0.09208683 |
| MXRA5      | 0.99789922 | 0.01059092 | 0.09209904 |
| STT3B      | 1.28177897 | 0.0105937  | 0.09209904 |
| TMEM14C    | 1.39270339 | 0.01059624 | 0.09209904 |
| RARRES2    | 1.21965648 | 0.01058098 | 0.09209904 |
| NACA       | 1.11770537 | 0.01058726 | 0.09209904 |
| CD86       | 1.61696879 | 0.01057766 | 0.09209904 |
| HOXC6      | -1.6206608 | 0.01060764 | 0.09216195 |
| MKRN8P     | -3.0488455 | 0.01063688 | 0.09237971 |
| EN1        | -2.8008334 | 0.01065136 | 0.09246918 |
| SRGAP2C    | 1.06597184 | 0.01065558 | 0.09246955 |
| MAPRE2     | 1.31340957 | 0.01066618 | 0.09252522 |
| LINC01931  | -4.1810347 | 0.01067451 | 0.09256124 |
| IGLV1-47   | 3.68521341 | 0.01068356 | 0.09260337 |
| RN7SL674P  | 2.11192599 | 0.01069005 | 0.09262339 |
| ZNF880     | 1.33115504 | 0.01069589 | 0.09263596 |
| NCF1C      | 1.84394319 | 0.01069987 | 0.09263596 |
| ST13P21    | -3.331226  | 0.01071976 | 0.09277184 |
| THEMIS     | 1.58542577 | 0.01072655 | 0.09279431 |
| SLC16A6    | 1.61520842 | 0.01073123 | 0.09279849 |
| SQOR       | 1.12835835 | 0.01074479 | 0.09287947 |

|           |            |            |            |
|-----------|------------|------------|------------|
| C4orf33   | 1.47313826 | 0.01074954 | 0.09288422 |
| ZNF718    | 1.52032959 | 0.0107613  | 0.09294961 |
| HOMER2P1  | -3.2177875 | 0.01078379 | 0.09310751 |
| SLC35G3   | -3.8797579 | 0.01080276 | 0.0932349  |
| SERINC3   | 1.04085439 | 0.01081528 | 0.09329483 |
| LINC01280 | -3.441973  | 0.01081814 | 0.09329483 |
| HADHAP2   | -2.6726351 | 0.01084068 | 0.09341642 |
| TBC1D2B   | 1.06881188 | 0.01083833 | 0.09341642 |
| ABCC3     | -1.172099  | 0.0108557  | 0.09347965 |
| TMEM151A  | -3.4411951 | 0.01085646 | 0.09347965 |
| ASNSP6    | -2.8998003 | 0.01089697 | 0.09379189 |
| TMPOP2    | -2.9802636 | 0.01090627 | 0.09383547 |
| NSFP1     | 8.59428936 | 0.01095305 | 0.09420137 |
| ACTBL2    | -3.8018362 | 0.01097547 | 0.09435749 |
| BNIP3L    | 1.33659857 | 0.01100046 | 0.09453557 |
| MIR9-3HG  | -1.6561598 | 0.01101005 | 0.09458129 |
| TMEM132B  | -1.9162561 | 0.0110403  | 0.09480436 |
| BZW1P1    | -3.4328645 | 0.01105499 | 0.09489366 |
| BCL11A    | -1.1301394 | 0.01107658 | 0.0950421  |
| EEF1GP2   | -3.7439243 | 0.01108928 | 0.09511425 |
| SEPTIN5   | -1.4388218 | 0.01112919 | 0.09512134 |
| OSTC      | 1.270141   | 0.0111271  | 0.09512134 |
| IFNWP15   | -4.2225335 | 0.01109971 | 0.09512134 |
| CCNG2     | 1.17574496 | 0.01111746 | 0.09512134 |
| TAF11L11  | -3.5207458 | 0.01111175 | 0.09512134 |
| LINC01579 | -3.2574995 | 0.01112924 | 0.09512134 |
| LMOD2     | -3.6645031 | 0.01112414 | 0.09512134 |
| CD27      | 1.7984007  | 0.01112767 | 0.09512134 |
| KIAA0513  | 1.15529551 | 0.0111255  | 0.09512134 |
| PDE4B     | 1.51971233 | 0.0111331  | 0.09512134 |
| CXCL5     | 2.03561733 | 0.01114283 | 0.09516777 |
| WFIKKN2   | -2.8514808 | 0.01116544 | 0.09517719 |
| HEXD-IT1  | -1.5039012 | 0.01115062 | 0.09517719 |
| RPL12P38  | -2.5028927 | 0.01116518 | 0.09517719 |
| HMGB1P9   | -3.3723808 | 0.01115762 | 0.09517719 |
| PCAT6     | -2.402847  | 0.01116219 | 0.09517719 |
| ZNF79     | -1.2245968 | 0.01117627 | 0.09518793 |
| LRP8      | -1.3103559 | 0.01117155 | 0.09518793 |
| ANKRD18B  | -2.1896024 | 0.01118021 | 0.09518793 |
| COX6C     | 1.33798883 | 0.0111839  | 0.09518793 |
| LINC02280 | -1.7745048 | 0.01121093 | 0.09534458 |
| CRYZ      | 1.19536327 | 0.01120818 | 0.09534458 |

|             |            |            |            |
|-------------|------------|------------|------------|
| RAX         | -2.7485078 | 0.01123513 | 0.09539327 |
| SPATA31D2P  | -2.3515858 | 0.01122115 | 0.09539327 |
| CD36        | 1.31397348 | 0.01123462 | 0.09539327 |
| TSSK1A      | -3.9668053 | 0.01124191 | 0.09539327 |
| PTCH1       | -1.0981136 | 0.01122577 | 0.09539327 |
| RRM2B       | 1.02816728 | 0.01124252 | 0.09539327 |
| GRM3        | -3.2356129 | 0.01124762 | 0.09539998 |
| CENPCP1     | -2.4826668 | 0.01125491 | 0.09542527 |
| ACTR3BP1    | -4.3986032 | 0.01126217 | 0.09545021 |
| RBBP4       | 0.99670235 | 0.01127304 | 0.0955058  |
| RAPGEF4-AS1 | -2.7618716 | 0.01128424 | 0.09552748 |
| SPI1        | 1.31184486 | 0.01128117 | 0.09552748 |
| LINC01563   | -4.0288739 | 0.0112909  | 0.09554733 |
| HACD4       | 1.28488548 | 0.01132493 | 0.09576209 |
| LRRTM1      | -2.2847343 | 0.01132293 | 0.09576209 |
| KLF15       | 1.65830528 | 0.01134253 | 0.09587428 |
| LINC01443   | -4.2404605 | 0.01136746 | 0.0960249  |
| GABRA1      | -3.230035  | 0.01136903 | 0.0960249  |
| C22orf31    | -3.8693864 | 0.01137541 | 0.09604213 |
| LACTB       | 1.14608641 | 0.01139144 | 0.09614079 |
| SLC11A2     | 0.98254762 | 0.01140258 | 0.09619816 |
| LINC01230   | -2.7158741 | 0.01141524 | 0.09626827 |
| CYP17A1     | -2.6327872 | 0.01143842 | 0.09633477 |
| HELLPAR     | -1.5463721 | 0.01143522 | 0.09633477 |
| ERH         | 1.1628286  | 0.0114292  | 0.09633477 |
| SDK1        | -1.2948646 | 0.01144054 | 0.09633477 |
| UAP1-DT     | -4.2703407 | 0.0114622  | 0.09648039 |
| UBE2O       | -1.0946273 | 0.01148047 | 0.0965975  |
| HIKESHI     | 1.46485273 | 0.01149056 | 0.09660886 |
| LINC02767   | -1.6844504 | 0.01148671 | 0.09660886 |
| TMEM167A    | 1.05974738 | 0.01152972 | 0.09690136 |
| SAMD9L      | 1.37663357 | 0.01153739 | 0.09692895 |
| ASPSCR1     | -1.0411276 | 0.01155702 | 0.0970003  |
| XXYL1       | -1.2098282 | 0.01155903 | 0.0970003  |
| IPCEF1      | 1.48940927 | 0.01155691 | 0.0970003  |
| VMP1        | 1.11586693 | 0.01156564 | 0.09701899 |
| LINC01141   | -3.7951365 | 0.01157881 | 0.09709265 |
| FOXD4       | -2.9948114 | 0.01158839 | 0.09713615 |
| PLGLB2      | -1.7240016 | 0.01159783 | 0.09714174 |
| WDR48       | 1.11446754 | 0.01159537 | 0.09714174 |
| FAM204A     | 1.33139268 | 0.01160895 | 0.09716126 |
| CHST11      | 1.28778557 | 0.01160776 | 0.09716126 |

|              |            |            |            |
|--------------|------------|------------|------------|
| MIR181A1HG   | 1.43783374 | 0.01162529 | 0.09726127 |
| LYST         | 1.12988826 | 0.01162989 | 0.09726296 |
| CCL8         | 2.7561176  | 0.01166026 | 0.09733629 |
| ACTG1P22     | -2.5809902 | 0.01165003 | 0.09733629 |
| CD6          | 1.65386458 | 0.01165277 | 0.09733629 |
| GUCY2C       | -3.9479244 | 0.01166065 | 0.09733629 |
| KNG1         | -2.2813526 | 0.01166022 | 0.09733629 |
| USP53        | 1.02276193 | 0.01166631 | 0.09734686 |
| RNF145       | 1.18016554 | 0.01168253 | 0.09744546 |
| BLOC1S2      | 1.33479276 | 0.01169705 | 0.09752975 |
| EDC3         | -1.2057986 | 0.01172201 | 0.09763646 |
| ST13P10      | -2.7203707 | 0.01172749 | 0.09763646 |
| SUDS3P1      | -1.8468016 | 0.01172676 | 0.09763646 |
| RPL22P24     | -3.3033769 | 0.01172413 | 0.09763646 |
| GABARAP      | 1.06796078 | 0.01174292 | 0.09772814 |
| PABPC1P13    | -3.5309209 | 0.0117535  | 0.09777942 |
| HIC2         | -1.1736751 | 0.01176542 | 0.097805   |
| SLC22A31     | 2.54893757 | 0.01176183 | 0.097805   |
| ELDR         | -2.883685  | 0.0117806  | 0.09789443 |
| LINC00652    | -3.7304429 | 0.01179238 | 0.09791882 |
| PHF11        | 1.16485227 | 0.01178819 | 0.09791882 |
| SACM1L       | 1.19307795 | 0.01180827 | 0.09801395 |
| BMS1P4-AGAP5 | 8.5066061  | 0.01182863 | 0.09813388 |
| CXCL9        | 1.66145664 | 0.01183602 | 0.09813388 |
| IGKV1D-16    | 4.30807911 | 0.01183241 | 0.09813388 |
| ATP5MG       | 1.04911615 | 0.01185211 | 0.09823049 |
| LARP4P       | -1.9642729 | 0.0118608  | 0.09826572 |
| PLEKHA2      | 1.19863461 | 0.01187061 | 0.09831014 |
| METTL27      | -2.0329838 | 0.01188237 | 0.09835211 |
| ZNF750       | -1.4775619 | 0.01188456 | 0.09835211 |
| FGF9         | -2.0997969 | 0.01190306 | 0.09846831 |
| RNF149       | 1.20408193 | 0.01192385 | 0.09859975 |
| FZD10-AS1    | -1.6250721 | 0.01192786 | 0.09859975 |
| PARK7        | 1.18604856 | 0.01193285 | 0.09860421 |
| ATP5PF       | 1.21410381 | 0.01195524 | 0.09875234 |
| FABP5P7      | 3.16564386 | 0.01197515 | 0.09887991 |
| IL13RA1      | 1.0066201  | 0.01198847 | 0.09895298 |
| DDX50P2      | -3.6690005 | 0.01200455 | 0.09904877 |
| C15orf48     | 2.20606595 | 0.01201734 | 0.09911729 |
| SCIMP        | 1.42057212 | 0.01204485 | 0.09912376 |
| HOXC9        | -1.7593495 | 0.01203199 | 0.09912376 |
| NCLP2        | -3.3143043 | 0.01203977 | 0.09912376 |



|             |            |            |            |
|-------------|------------|------------|------------|
| LINC02068   | -1.9602436 | 0.01203917 | 0.09912376 |
| GDF11       | -1.1983554 | 0.0120315  | 0.09912376 |
| MUC20P1     | -1.260832  | 0.012045   | 0.09912376 |
| TMEM63C     | -1.7529211 | 0.01206419 | 0.09924476 |
| FAM186B     | -2.0092201 | 0.01212624 | 0.09945945 |
| CCDC90B-AS1 | -2.8698052 | 0.01212316 | 0.09945945 |
| KRT8P43     | -3.3943193 | 0.01210443 | 0.09945945 |
| NFKBIA      | 1.03590868 | 0.01211616 | 0.09945945 |
| RPH3A       | -2.2894064 | 0.01212071 | 0.09945945 |
| DRD4        | -3.0401935 | 0.01210239 | 0.09945945 |
| ZSCAN31     | -1.6868341 | 0.01211479 | 0.09945945 |
| HRNR        | -1.878788  | 0.01210042 | 0.09945945 |
| KREMEN1     | -1.4445678 | 0.01214041 | 0.09953873 |
| LINC02503   | -2.6809959 | 0.01215688 | 0.09959519 |
| SEPHS1P7    | -4.9423587 | 0.01216032 | 0.09959519 |
| POTEJ       | -4.5856954 | 0.01216079 | 0.09959519 |
| PAG1        | 1.41717271 | 0.01220413 | 0.09991313 |
